# Supplementary material for: Constraints on Sandstone-Type Uranium Deposits by the Tectonic Uplift and Denudation Process in the Eastern Junggar Basin, Northwest China: Evidence from Apatite Fission Track and Detrital Zircon U-Pb Ages
Source: MDPI journal article supplement (doi:10.3390/min12070905), 2022-07-19
Supplement: s1 [file s1]

Table S1. LA-ICP-MS detrital zircon U-Pb data of the samples.

| Sample   | Content (μg/g)    |                  | <sup>232</sup> Th/ <sup>238</sup> U | Isotope ratio                        |         |                                     |         |                                     |         |                                      |         | Ages (Ma)                            |     |                                     |    |                                     |    |
|----------|-------------------|------------------|-------------------------------------|--------------------------------------|---------|-------------------------------------|---------|-------------------------------------|---------|--------------------------------------|---------|--------------------------------------|-----|-------------------------------------|----|-------------------------------------|----|
|          | <sup>232</sup> Th | <sup>238</sup> U |                                     | <sup>207</sup> Pb/ <sup>206</sup> Pb | 1σ      | <sup>207</sup> Pb/ <sup>235</sup> U | 1σ      | <sup>206</sup> Pb/ <sup>238</sup> U | 1σ      | <sup>208</sup> Pb/ <sup>232</sup> Th | 1σ      | <sup>207</sup> Pb/ <sup>206</sup> Pb | 1σ  | <sup>207</sup> Pb/ <sup>235</sup> U | 1σ | <sup>206</sup> Pb/ <sup>238</sup> U | 1σ |
| KT-01    |                   |                  |                                     |                                      |         |                                     |         |                                     |         |                                      |         |                                      |     |                                     |    |                                     |    |
| KT-01-1  | 293               | 164              | 1.787                               | 0.05072                              | 0.00031 | 0.35797                             | 0.00421 | 0.05121                             | 0.00059 | 0.01433                              | 0.00021 | 228                                  | 12  | 311                                 | 3  | 322                                 | 4  |
| KT-01-2  | 117               | 61               | 1.932                               | 0.05452                              | 0.00265 | 0.41083                             | 0.02212 | 0.05441                             | 0.00031 | 0.01577                              | 0.00021 | 393                                  | 112 | 349                                 | 16 | 342                                 | 2  |
| KT-01-3  | 349               | 128              | 2.737                               | 0.05303                              | 0.00036 | 0.38553                             | 0.00423 | 0.05265                             | 0.00032 | 0.01582                              | 0.00018 | 330                                  | 14  | 331                                 | 3  | 331                                 | 2  |
| KT-01-4  | 79                | 27               | 2.997                               | 0.05244                              | 0.00049 | 0.41580                             | 0.00434 | 0.05751                             | 0.00032 | 0.01778                              | 0.00017 | 305                                  | 14  | 353                                 | 3  | 360                                 | 2  |
| KT-01-5  | 119               | 38               | 3.125                               | 0.05268                              | 0.00025 | 0.40330                             | 0.00320 | 0.05549                             | 0.00030 | 0.01650                              | 0.00013 | 315                                  | 9   | 344                                 | 2  | 348                                 | 2  |
| KT-01-6  | 194               | 98               | 1.977                               | 0.05302                              | 0.00033 | 0.37654                             | 0.00396 | 0.05145                             | 0.00031 | 0.01527                              | 0.00013 | 329                                  | 13  | 324                                 | 3  | 323                                 | 2  |
| KT-01-7  | 1075              | 423              | 2.542                               | 0.05484                              | 0.00028 | 0.35701                             | 0.00464 | 0.04713                             | 0.00046 | 0.01477                              | 0.00021 | 406                                  | 14  | 310                                 | 3  | 297                                 | 3  |
| KT-01-8  | 195               | 207              | 0.945                               | 0.05268                              | 0.00028 | 0.36638                             | 0.00365 | 0.05041                             | 0.00040 | 0.01497                              | 0.00015 | 315                                  | 10  | 317                                 | 3  | 317                                 | 2  |
| KT-01-9  | 196               | 67               | 2.920                               | 0.05238                              | 0.00027 | 0.34397                             | 0.00314 | 0.04764                             | 0.00039 | 0.01449                              | 0.00015 | 302                                  | 9   | 300                                 | 2  | 300                                 | 2  |
| KT-01-10 | 637               | 204              | 3.125                               | 0.05242                              | 0.00018 | 0.34478                             | 0.00304 | 0.04771                             | 0.00041 | 0.01459                              | 0.00016 | 304                                  | 9   | 301                                 | 2  | 300                                 | 3  |
| KT-01-11 | 571               | 181              | 3.150                               | 0.05256                              | 0.00017 | 0.35712                             | 0.00303 | 0.04927                             | 0.00040 | 0.01523                              | 0.00013 | 310                                  | 9   | 310                                 | 2  | 310                                 | 2  |
| KT-01-12 | 197               | 153              | 1.286                               | 0.05178                              | 0.00025 | 0.31689                             | 0.00240 | 0.04438                             | 0.00028 | 0.01330                              | 0.00010 | 276                                  | 8   | 280                                 | 2  | 280                                 | 2  |
| KT-01-13 | 543               | 181              | 2.996                               | 0.05258                              | 0.00016 | 0.36222                             | 0.00243 | 0.04995                             | 0.00030 | 0.01532                              | 0.00012 | 311                                  | 7   | 314                                 | 2  | 314                                 | 2  |
| KT-01-14 | 940               | 355              | 2.644                               | 0.05519                              | 0.00019 | 0.34161                             | 0.00291 | 0.04488                             | 0.00035 | 0.01421                              | 0.00015 | 420                                  | 8   | 298                                 | 2  | 283                                 | 2  |
| KT-01-15 | 217               | 118              | 1.844                               | 0.05338                              | 0.00025 | 0.36649                             | 0.00250 | 0.04979                             | 0.00025 | 0.01559                              | 0.00010 | 345                                  | 7   | 317                                 | 2  | 313                                 | 2  |
| KT-01-16 | 431               | 138              | 3.116                               | 0.05260                              | 0.00019 | 0.36082                             | 0.00266 | 0.04974                             | 0.00032 | 0.01540                              | 0.00013 | 312                                  | 7   | 313                                 | 2  | 313                                 | 2  |
| KT-01-17 | 342               | 131              | 2.605                               | 0.05326                              | 0.00021 | 0.38418                             | 0.00320 | 0.05229                             | 0.00034 | 0.01620                              | 0.00014 | 340                                  | 9   | 330                                 | 2  | 329                                 | 2  |
| KT-01-18 | 446               | 169              | 2.644                               | 0.05268                              | 0.00018 | 0.34469                             | 0.00235 | 0.04744                             | 0.00027 | 0.01439                              | 0.00010 | 315                                  | 7   | 301                                 | 2  | 299                                 | 2  |
| KT-01-19 | 189               | 85               | 2.207                               | 0.05307                              | 0.00028 | 0.37787                             | 0.00245 | 0.05163                             | 0.00019 | 0.01581                              | 0.00010 | 332                                  | 8   | 325                                 | 2  | 325                                 | 1  |
| KT-01-20 | 535               | 298              | 1.792                               | 0.05213                              | 0.00018 | 0.32996                             | 0.00234 | 0.04590                             | 0.00029 | 0.01354                              | 0.00011 | 291                                  | 7   | 290                                 | 2  | 289                                 | 2  |
| KT-01-21 | 186               | 76               | 2.464                               | 0.05236                              | 0.00028 | 0.34109                             | 0.00287 | 0.04724                             | 0.00032 | 0.01398                              | 0.00012 | 301                                  | 9   | 298                                 | 2  | 298                                 | 2  |
| KT-01-22 | 102               | 38               | 2.728                               | 0.05403                              | 0.00039 | 0.41146                             | 0.00282 | 0.05529                             | 0.00034 | 0.01820                              | 0.00017 | 372                                  | 7   | 350                                 | 2  | 347                                 | 2  |

| Sample   | Content (μg/g)    |                  | $^{232}\text{Th}/^{238}\text{U}$ | Isotope ratio                     |         |                                  |         |                                  |         |                                   |         | Ages (Ma)                         |    |                                  |    |                                  |    |
|----------|-------------------|------------------|----------------------------------|-----------------------------------|---------|----------------------------------|---------|----------------------------------|---------|-----------------------------------|---------|-----------------------------------|----|----------------------------------|----|----------------------------------|----|
|          | $^{232}\text{Th}$ | $^{238}\text{U}$ |                                  | $^{207}\text{Pb}/^{206}\text{Pb}$ | 1σ      | $^{207}\text{Pb}/^{235}\text{U}$ | 1σ      | $^{206}\text{Pb}/^{238}\text{U}$ | 1σ      | $^{208}\text{Pb}/^{232}\text{Th}$ | 1σ      | $^{207}\text{Pb}/^{206}\text{Pb}$ | 1σ | $^{207}\text{Pb}/^{235}\text{U}$ | 1σ | $^{206}\text{Pb}/^{238}\text{U}$ | 1σ |
| KT-01-23 | 556               | 449              | 1.239                            | 0.05305                           | 0.00046 | 0.37304                          | 0.00473 | 0.05092                          | 0.00031 | 0.01593                           | 0.00018 | 331                               | 18 | 322                              | 4  | 320                              | 2  |
| KT-01-24 | 187               | 77               | 2.441                            | 0.05168                           | 0.00027 | 0.35106                          | 0.00246 | 0.04925                          | 0.00025 | 0.01432                           | 0.00011 | 271                               | 8  | 306                              | 2  | 310                              | 2  |
| KT-01-25 | 658               | 218              | 3.021                            | 0.05359                           | 0.00016 | 0.36511                          | 0.00218 | 0.04940                          | 0.00030 | 0.01503                           | 0.00010 | 354                               | 6  | 316                              | 2  | 311                              | 2  |
| KT-01-26 | 255               | 135              | 1.886                            | 0.05425                           | 0.00024 | 0.48632                          | 0.00388 | 0.06500                          | 0.00047 | 0.01900                           | 0.00016 | 382                               | 8  | 402                              | 3  | 406                              | 3  |
| KT-01-27 | 510               | 202              | 2.520                            | 0.05653                           | 0.00059 | 0.37145                          | 0.00667 | 0.04756                          | 0.00056 | 0.01538                           | 0.00032 | 473                               | 20 | 321                              | 5  | 300                              | 3  |
| KT-01-28 | 1189              | 455              | 2.612                            | 0.05991                           | 0.00188 | 0.31946                          | 0.00923 | 0.03867                          | 0.00047 | 0.01195                           | 0.00015 | 600                               | 69 | 281                              | 7  | 245                              | 3  |
| KT-01-29 | 247               | 176              | 1.405                            | 0.05299                           | 0.00027 | 0.36656                          | 0.00327 | 0.05016                          | 0.00037 | 0.01477                           | 0.00016 | 328                               | 9  | 317                              | 2  | 315                              | 2  |
| KT-01-30 | 379               | 137              | 2.775                            | 0.05275                           | 0.00021 | 0.37061                          | 0.00311 | 0.05095                          | 0.00038 | 0.01581                           | 0.00014 | 318                               | 9  | 320                              | 2  | 320                              | 2  |
| KT-01-31 | 169               | 60               | 2.819                            | 0.05215                           | 0.00028 | 0.36064                          | 0.00298 | 0.05013                          | 0.00029 | 0.01553                           | 0.00014 | 292                               | 9  | 313                              | 2  | 315                              | 2  |
| KT-01-32 | 423               | 152              | 2.777                            | 0.05331                           | 0.00020 | 0.36818                          | 0.00245 | 0.05008                          | 0.00027 | 0.01558                           | 0.00012 | 342                               | 7  | 318                              | 2  | 315                              | 2  |
| KT-01-33 | 607               | 180              | 3.373                            | 0.05271                           | 0.00071 | 0.35047                          | 0.00408 | 0.04822                          | 0.00032 | 0.01512                           | 0.00010 | 316                               | 31 | 305                              | 3  | 304                              | 2  |
| KT-01-34 | 301               | 89               | 3.398                            | 0.05326                           | 0.00025 | 0.37155                          | 0.00236 | 0.05059                          | 0.00026 | 0.01599                           | 0.00011 | 340                               | 7  | 321                              | 2  | 318                              | 2  |
| KT-01-35 | 1174              | 880              | 1.334                            | 0.05624                           | 0.00060 | 0.37119                          | 0.00559 | 0.04777                          | 0.00037 | 0.01469                           | 0.00015 | 462                               | 20 | 321                              | 4  | 301                              | 2  |
| KT-01-36 | 124               | 41               | 3.024                            | 0.05354                           | 0.00034 | 0.36977                          | 0.00283 | 0.05009                          | 0.00024 | 0.01701                           | 0.00015 | 352                               | 9  | 319                              | 2  | 315                              | 1  |
| KT-01-37 | 344               | 136              | 2.531                            | 0.05385                           | 0.00030 | 0.39379                          | 0.00265 | 0.05305                          | 0.00028 | 0.01641                           | 0.00013 | 365                               | 7  | 337                              | 2  | 333                              | 2  |
| KT-01-38 | 265               | 101              | 2.636                            | 0.05541                           | 0.00052 | 0.37056                          | 0.00703 | 0.04830                          | 0.00056 | 0.01517                           | 0.00028 | 429                               | 23 | 320                              | 5  | 304                              | 3  |
| KT-01-39 | 86                | 39               | 2.190                            | 0.05625                           | 0.00036 | 0.56397                          | 0.00443 | 0.07274                          | 0.00042 | 0.02228                           | 0.00018 | 462                               | 8  | 454                              | 3  | 453                              | 3  |
| KT-01-40 | 425               | 150              | 2.842                            | 0.05179                           | 0.00020 | 0.36337                          | 0.00368 | 0.05090                          | 0.00051 | 0.01542                           | 0.00019 | 276                               | 11 | 315                              | 3  | 320                              | 3  |
| KT-01-41 | 348               | 123              | 2.825                            | 0.05177                           | 0.00023 | 0.36884                          | 0.00258 | 0.05168                          | 0.00027 | 0.01554                           | 0.00013 | 275                               | 8  | 319                              | 2  | 325                              | 2  |
| KT-01-42 | 473               | 147              | 3.213                            | 0.05142                           | 0.00022 | 0.37952                          | 0.00309 | 0.05354                          | 0.00036 | 0.01594                           | 0.00016 | 260                               | 8  | 327                              | 2  | 336                              | 2  |
| KT-01-43 | 241               | 176              | 1.370                            | 0.05216                           | 0.00027 | 0.39220                          | 0.00380 | 0.05452                          | 0.00042 | 0.01602                           | 0.00016 | 292                               | 10 | 336                              | 3  | 342                              | 3  |
| KT-01-44 | 241               | 58               | 4.134                            | 0.06397                           | 0.00066 | 0.49326                          | 0.00449 | 0.05599                          | 0.00027 | 0.02719                           | 0.00054 | 741                               | 11 | 407                              | 3  | 351                              | 2  |
| KT-01-45 | 303               | 119              | 2.539                            | 0.05322                           | 0.00021 | 0.40493                          | 0.00224 | 0.05517                          | 0.00021 | 0.01686                           | 0.00017 | 338                               | 6  | 345                              | 2  | 346                              | 1  |
| KT-01-46 | 691               | 289              | 2.390                            | 0.05570                           | 0.00063 | 0.40034                          | 0.00429 | 0.05213                          | 0.00018 | 0.01624                           | 0.00006 | 440                               | 26 | 342                              | 3  | 328                              | 1  |

| Sample   | Content (μg/g)    |                  | <sup>232</sup> Th/ <sup>238</sup> U | Isotope ratio                        |         |                                     |         |                                     |         |                                      |         | Ages (Ma)                            |     |                                     |    |                                     |    |
|----------|-------------------|------------------|-------------------------------------|--------------------------------------|---------|-------------------------------------|---------|-------------------------------------|---------|--------------------------------------|---------|--------------------------------------|-----|-------------------------------------|----|-------------------------------------|----|
|          | <sup>232</sup> Th | <sup>238</sup> U |                                     | <sup>207</sup> Pb/ <sup>206</sup> Pb | 1σ      | <sup>207</sup> Pb/ <sup>235</sup> U | 1σ      | <sup>206</sup> Pb/ <sup>238</sup> U | 1σ      | <sup>208</sup> Pb/ <sup>232</sup> Th | 1σ      | <sup>207</sup> Pb/ <sup>206</sup> Pb | 1σ  | <sup>207</sup> Pb/ <sup>235</sup> U | 1σ | <sup>206</sup> Pb/ <sup>238</sup> U | 1σ |
| KT-01-47 | 665               | 227              | 2.934                               | 0.05275                              | 0.00015 | 0.36921                             | 0.00310 | 0.05074                             | 0.00039 | 0.01588                              | 0.00016 | 318                                  | 9   | 319                                 | 2  | 319                                 | 2  |
| KT-01-48 | 699               | 249              | 2.811                               | 0.05316                              | 0.00026 | 0.36859                             | 0.00350 | 0.05025                             | 0.00037 | 0.01585                              | 0.00017 | 336                                  | 10  | 319                                 | 3  | 316                                 | 2  |
| KT-01-49 | 187               | 40               | 4.725                               | 0.05591                              | 0.00037 | 0.47306                             | 0.00437 | 0.06133                             | 0.00031 | 0.02954                              | 0.00052 | 449                                  | 12  | 393                                 | 3  | 384                                 | 2  |
| KT-01-50 | 332               | 116              | 2.859                               | 0.05290                              | 0.00023 | 0.38112                             | 0.00352 | 0.05223                             | 0.00039 | 0.01665                              | 0.00017 | 324                                  | 10  | 328                                 | 3  | 328                                 | 2  |
| KT-01-51 | 24                | 12               | 2.020                               | 0.05320                              | 0.00073 | 0.40342                             | 0.00557 | 0.05510                             | 0.00043 | 0.01705                              | 0.00020 | 337                                  | 18  | 344                                 | 4  | 346                                 | 3  |
| KT-01-52 | 158               | 138              | 1.145                               | 0.05243                              | 0.00028 | 0.38906                             | 0.00398 | 0.05384                             | 0.00049 | 0.01644                              | 0.00024 | 304                                  | 10  | 334                                 | 3  | 338                                 | 3  |
| KT-01-53 | 482               | 140              | 3.451                               | 0.05191                              | 0.00022 | 0.39547                             | 0.00358 | 0.05527                             | 0.00042 | 0.01729                              | 0.00018 | 281                                  | 9   | 338                                 | 3  | 347                                 | 3  |
| KT-01-54 | 93                | 66               | 1.398                               | 0.05369                              | 0.00187 | 0.43921                             | 0.01944 | 0.05898                             | 0.00054 | 0.01824                              | 0.00028 | 358                                  | 84  | 370                                 | 14 | 369                                 | 3  |
| KT-01-55 | 403               | 153              | 2.625                               | 0.05575                              | 0.00188 | 0.40549                             | 0.01258 | 0.05275                             | 0.00069 | 0.01643                              | 0.00020 | 443                                  | 77  | 346                                 | 9  | 331                                 | 4  |
| KT-01-56 | 538               | 331              | 1.625                               | 0.05363                              | 0.00028 | 0.39534                             | 0.00244 | 0.05348                             | 0.00022 | 0.01583                              | 0.00013 | 355                                  | 7   | 338                                 | 2  | 336                                 | 1  |
| KT-01-57 | 1278              | 698              | 1.832                               | 0.06004                              | 0.00419 | 0.30693                             | 0.01798 | 0.03708                             | 0.00140 | 0.01145                              | 0.00042 | 605                                  | 155 | 272                                 | 14 | 235                                 | 9  |
| KT-01-58 | 306               | 174              | 1.755                               | 0.05062                              | 0.00029 | 0.37509                             | 0.00509 | 0.05373                             | 0.00068 | 0.01641                              | 0.00030 | 223                                  | 14  | 323                                 | 4  | 337                                 | 4  |
| KT-01-59 | 102               | 40               | 2.560                               | 0.05057                              | 0.00041 | 0.36169                             | 0.00440 | 0.05183                             | 0.00047 | 0.01563                              | 0.00025 | 221                                  | 13  | 313                                 | 3  | 326                                 | 3  |
| KT-01-60 | 60                | 27               | 2.238                               | 0.05359                              | 0.00051 | 0.47745                             | 0.00569 | 0.06453                             | 0.00047 | 0.01936                              | 0.00025 | 354                                  | 14  | 396                                 | 4  | 403                                 | 3  |
| KT-01-61 | 306               | 348              | 0.879                               | 0.05055                              | 0.00034 | 0.38470                             | 0.00387 | 0.05512                             | 0.00045 | 0.01595                              | 0.00021 | 221                                  | 11  | 330                                 | 3  | 346                                 | 3  |
| KT-01-62 | 365               | 123              | 2.977                               | 0.05052                              | 0.00030 | 0.34903                             | 0.00318 | 0.05006                             | 0.00037 | 0.01479                              | 0.00019 | 219                                  | 10  | 304                                 | 2  | 315                                 | 2  |
| KT-01-63 | 528               | 197              | 2.679                               | 0.05661                              | 0.00059 | 0.36857                             | 0.00356 | 0.04722                             | 0.00018 | 0.01468                              | 0.00005 | 476                                  | 24  | 319                                 | 3  | 297                                 | 1  |
| KT-01-64 | 533               | 196              | 2.714                               | 0.05043                              | 0.00023 | 0.37228                             | 0.00257 | 0.05351                             | 0.00035 | 0.01597                              | 0.00015 | 215                                  | 7   | 321                                 | 2  | 336                                 | 2  |
| KT-01-65 | 276               | 108              | 2.555                               | 0.05293                              | 0.00065 | 0.41081                             | 0.00685 | 0.05613                             | 0.00041 | 0.01774                              | 0.00029 | 326                                  | 25  | 349                                 | 5  | 352                                 | 2  |
| KT-01-66 | 387               | 139              | 2.779                               | 0.05026                              | 0.00022 | 0.35919                             | 0.00436 | 0.05179                             | 0.00057 | 0.01536                              | 0.00022 | 207                                  | 13  | 312                                 | 3  | 325                                 | 3  |
| KT-01-67 | 201               | 54               | 3.708                               | 0.05333                              | 0.00054 | 0.39828                             | 0.00496 | 0.05410                             | 0.00030 | 0.01698                              | 0.00029 | 343                                  | 18  | 340                                 | 4  | 340                                 | 2  |
| KT-01-68 | 226               | 53               | 4.244                               | 0.05186                              | 0.00034 | 0.34853                             | 0.00236 | 0.04879                             | 0.00037 | 0.01511                              | 0.00011 | 279                                  | 8   | 304                                 | 2  | 307                                 | 2  |
| KT-01-69 | 532               | 179              | 2.973                               | 0.05232                              | 0.00029 | 0.37215                             | 0.00297 | 0.05164                             | 0.00050 | 0.01598                              | 0.00016 | 300                                  | 10  | 321                                 | 2  | 325                                 | 3  |
| KT-01-70 | 394               | 415              | 0.949                               | 0.05153                              | 0.00021 | 0.36107                             | 0.00228 | 0.05079                             | 0.00025 | 0.01471                              | 0.00008 | 264                                  | 7   | 313                                 | 2  | 319                                 | 2  |

| Sample   | Content (μg/g)    |                  | <sup>232</sup> Th/ <sup>238</sup> U | Isotope ratio                        |         |                                     |         |                                     |         |                                      |         | Ages (Ma)                            |     |                                     |     |                                     |     |
|----------|-------------------|------------------|-------------------------------------|--------------------------------------|---------|-------------------------------------|---------|-------------------------------------|---------|--------------------------------------|---------|--------------------------------------|-----|-------------------------------------|-----|-------------------------------------|-----|
|          | <sup>232</sup> Th | <sup>238</sup> U |                                     | <sup>207</sup> Pb/ <sup>206</sup> Pb | 1σ      | <sup>207</sup> Pb/ <sup>235</sup> U | 1σ      | <sup>206</sup> Pb/ <sup>238</sup> U | 1σ      | <sup>208</sup> Pb/ <sup>232</sup> Th | 1σ      | <sup>207</sup> Pb/ <sup>206</sup> Pb | 1σ  | <sup>207</sup> Pb/ <sup>235</sup> U | 1σ  | <sup>206</sup> Pb/ <sup>238</sup> U | 1σ  |
| KT-01-71 | 413               | 131              | 3.145                               | 0.05115                              | 0.00018 | 0.34151                             | 0.00188 | 0.04840                             | 0.00021 | 0.01469                              | 0.00009 | 248                                  | 6   | 298                                 | 1   | 305                                 | 1   |
| KT-01-72 | 168               | 63               | 2.676                               | 0.05149                              | 0.00027 | 0.37017                             | 0.00376 | 0.05215                             | 0.00051 | 0.01724                              | 0.00016 | 263                                  | 10  | 320                                 | 3   | 328                                 | 3   |
| KT-01-73 | 87                | 55               | 1.583                               | 0.05261                              | 0.00030 | 0.40450                             | 0.00424 | 0.05578                             | 0.00052 | 0.01764                              | 0.00024 | 312                                  | 11  | 345                                 | 3   | 350                                 | 3   |
| KT-01-74 | 598               | 176              | 3.405                               | 0.05361                              | 0.00018 | 0.38068                             | 0.00351 | 0.05147                             | 0.00038 | 0.01641                              | 0.00020 | 355                                  | 10  | 328                                 | 3   | 324                                 | 2   |
| KT-01-75 | 221               | 97               | 2.287                               | 0.05193                              | 0.00024 | 0.36946                             | 0.00335 | 0.05161                             | 0.00042 | 0.01547                              | 0.00014 | 282                                  | 9   | 319                                 | 2   | 324                                 | 3   |
| KT-01-76 | 548               | 183              | 3.000                               | 0.05200                              | 0.00015 | 0.36163                             | 0.00262 | 0.05044                             | 0.00033 | 0.01540                              | 0.00013 | 285                                  | 7   | 313                                 | 2   | 317                                 | 2   |
| KT-01-77 | 255               | 122              | 2.091                               | 0.05543                              | 0.00165 | 0.37216                             | 0.01043 | 0.04869                             | 0.00048 | 0.01518                              | 0.00013 | 430                                  | 68  | 321                                 | 8   | 306                                 | 3   |
| KT-01-78 | 188               | 66               | 2.851                               | 0.05278                              | 0.00026 | 0.36207                             | 0.00269 | 0.04974                             | 0.00026 | 0.01479                              | 0.00013 | 319                                  | 8   | 314                                 | 2   | 313                                 | 2   |
| KT-01-79 | 426               | 124              | 3.431                               | 0.05250                              | 0.00018 | 0.35656                             | 0.00228 | 0.04924                             | 0.00028 | 0.01504                              | 0.00011 | 307                                  | 7   | 310                                 | 2   | 310                                 | 2   |
| KT-01-80 | 139               | 49               | 2.813                               | 0.05345                              | 0.00040 | 0.38429                             | 0.00299 | 0.05215                             | 0.00029 | 0.01647                              | 0.00013 | 348                                  | 9   | 330                                 | 2   | 328                                 | 2   |
| KT-01-81 | 439               | 156              | 2.814                               | 0.05203                              | 0.00022 | 0.34973                             | 0.00224 | 0.04875                             | 0.00032 | 0.01441                              | 0.00012 | 287                                  | 7   | 305                                 | 2   | 307                                 | 2   |
| KT-01-82 | 1                 | 0                | 51.784                              | 0.15663                              | 0.04544 | 2.65934                             | 2.45534 | 0.15367                             | 0.12494 | 0.12734                              | 0.09479 | 2420                                 | 968 | 1317                                | 681 | 921                                 | 698 |
| KT-01-83 | 361               | 154              | 2.347                               | 0.05116                              | 0.00027 | 0.33596                             | 0.00396 | 0.04759                             | 0.00051 | 0.01378                              | 0.00020 | 248                                  | 12  | 294                                 | 3   | 300                                 | 3   |
| KT-01-84 | 616               | 227              | 2.711                               | 0.05380                              | 0.00041 | 0.35954                             | 0.00491 | 0.04834                             | 0.00042 | 0.01466                              | 0.00025 | 363                                  | 16  | 312                                 | 4   | 304                                 | 3   |
| KT-01-85 | 121               | 46               | 2.631                               | 0.05333                              | 0.00235 | 0.38769                             | 0.01575 | 0.05286                             | 0.00053 | 0.01702                              | 0.00036 | 343                                  | 74  | 333                                 | 12  | 332                                 | 3   |
| KT-01-86 | 501               | 173              | 2.888                               | 0.05085                              | 0.00033 | 0.32905                             | 0.00320 | 0.04688                             | 0.00034 | 0.01317                              | 0.00016 | 234                                  | 11  | 289                                 | 2   | 295                                 | 2   |
| KT-01-87 | 705               | 282              | 2.498                               | 0.05083                              | 0.00025 | 0.32840                             | 0.00215 | 0.04683                             | 0.00025 | 0.01315                              | 0.00013 | 233                                  | 7   | 288                                 | 2   | 295                                 | 2   |
| KT-01-88 | 465               | 134              | 3.461                               | 0.05170                              | 0.00024 | 0.34872                             | 0.00490 | 0.04889                             | 0.00066 | 0.01426                              | 0.00023 | 272                                  | 15  | 304                                 | 4   | 308                                 | 4   |
| KT-01-89 | 356               | 100              | 3.549                               | 0.05422                              | 0.00057 | 0.33163                             | 0.00287 | 0.04436                             | 0.00026 | 0.01387                              | 0.00008 | 380                                  | 24  | 291                                 | 2   | 280                                 | 2   |
| KT-01-90 | 601               | 216              | 2.788                               | 0.06104                              | 0.00101 | 0.38629                             | 0.00597 | 0.04590                             | 0.00027 | 0.01415                              | 0.00008 | 641                                  | 36  | 332                                 | 4   | 289                                 | 2   |
| KT-01-91 | 238               | 85               | 2.818                               | 0.05243                              | 0.00022 | 0.34324                             | 0.00348 | 0.04748                             | 0.00046 | 0.01458                              | 0.00020 | 304                                  | 10  | 300                                 | 3   | 299                                 | 3   |
| KT-01-92 | 460               | 167              | 2.764                               | 0.05328                              | 0.00020 | 0.35318                             | 0.00263 | 0.04805                             | 0.00026 | 0.01487                              | 0.00012 | 341                                  | 8   | 307                                 | 2   | 303                                 | 2   |
| KT-01-93 | 242               | 79               | 3.077                               | 0.05303                              | 0.00024 | 0.35935                             | 0.00209 | 0.04914                             | 0.00020 | 0.01520                              | 0.00008 | 330                                  | 6   | 312                                 | 2   | 309                                 | 1   |
| KT-01-94 | 71                | 23               | 3.133                               | 0.05223                              | 0.00075 | 0.34867                             | 0.00465 | 0.04842                             | 0.00026 | 0.01520                              | 0.00007 | 296                                  | 33  | 304                                 | 3   | 305                                 | 2   |

| Sample   | Content (μg/g)    |                  | <sup>232</sup> Th/ <sup>238</sup> U | Isotope ratio                        |         |                                     |         |                                     |         |                                      |         | Ages (Ma)                            |    |                                     |    |                                     |    |
|----------|-------------------|------------------|-------------------------------------|--------------------------------------|---------|-------------------------------------|---------|-------------------------------------|---------|--------------------------------------|---------|--------------------------------------|----|-------------------------------------|----|-------------------------------------|----|
|          | <sup>232</sup> Th | <sup>238</sup> U |                                     | <sup>207</sup> Pb/ <sup>206</sup> Pb | 1σ      | <sup>207</sup> Pb/ <sup>235</sup> U | 1σ      | <sup>206</sup> Pb/ <sup>238</sup> U | 1σ      | <sup>208</sup> Pb/ <sup>232</sup> Th | 1σ      | <sup>207</sup> Pb/ <sup>206</sup> Pb | 1σ | <sup>207</sup> Pb/ <sup>235</sup> U | 1σ | <sup>206</sup> Pb/ <sup>238</sup> U | 1σ |
| KT-01-95 | 442               | 149              | 2.965                               | 0.05456                              | 0.00020 | 0.37134                             | 0.00163 | 0.04936                             | 0.00017 | 0.01545                              | 0.00008 | 394                                  | 5  | 321                                 | 1  | 311                                 | 1  |
| KT-02    |                   |                  |                                     |                                      |         |                                     |         |                                     |         |                                      |         |                                      |    |                                     |    |                                     |    |
| KT-02-1  | 88                | 46               | 1.905                               | 0.05297                              | 0.00039 | 0.37222                             | 0.00696 | 0.05094                             | 0.00054 | 0.01552                              | 0.00014 | 327                                  | 12 | 321                                 | 3  | 320                                 | 2  |
| KT-02-2  | 102               | 34               | 2.963                               | 0.05444                              | 0.00028 | 0.49177                             | 0.00742 | 0.06549                             | 0.00078 | 0.02067                              | 0.00020 | 389                                  | 8  | 406                                 | 3  | 409                                 | 2  |
| KT-02-3  | 107               | 55               | 1.939                               | 0.05176                              | 0.00039 | 0.31382                             | 0.00522 | 0.04397                             | 0.00044 | 0.01365                              | 0.00012 | 275                                  | 10 | 277                                 | 2  | 277                                 | 1  |
| KT-02-4  | 149               | 108              | 1.387                               | 0.05304                              | 0.00035 | 0.40700                             | 0.00764 | 0.05563                             | 0.00078 | 0.01746                              | 0.00016 | 330                                  | 10 | 347                                 | 3  | 349                                 | 2  |
| KT-02-5  | 261               | 195              | 1.335                               | 0.05199                              | 0.00027 | 0.36502                             | 0.01070 | 0.05089                             | 0.00138 | 0.01644                              | 0.00031 | 285                                  | 15 | 316                                 | 4  | 320                                 | 4  |
| KT-02-6  | 162               | 64               | 2.552                               | 0.05546                              | 0.00032 | 0.52772                             | 0.00608 | 0.06899                             | 0.00044 | 0.02160                              | 0.00016 | 431                                  | 7  | 430                                 | 2  | 430                                 | 1  |
| KT-02-7  | 104               | 59               | 1.770                               | 0.05290                              | 0.00041 | 0.37746                             | 0.00852 | 0.05174                             | 0.00094 | 0.01593                              | 0.00018 | 324                                  | 12 | 325                                 | 3  | 325                                 | 3  |
| KT-02-8  | 138               | 83               | 1.674                               | 0.05723                              | 0.00032 | 0.64272                             | 0.01334 | 0.08140                             | 0.00146 | 0.02577                              | 0.00031 | 500                                  | 10 | 504                                 | 4  | 504                                 | 4  |
| KT-02-9  | 103               | 79               | 1.314                               | 0.05224                              | 0.00036 | 0.30871                             | 0.00592 | 0.04283                             | 0.00054 | 0.01343                              | 0.00014 | 296                                  | 11 | 273                                 | 2  | 270                                 | 2  |
| KT-02-10 | 85                | 33               | 2.580                               | 0.05238                              | 0.00045 | 0.34817                             | 0.00708 | 0.04817                             | 0.00054 | 0.01482                              | 0.00015 | 302                                  | 13 | 303                                 | 3  | 303                                 | 2  |
| KT-02-11 | 387               | 198              | 1.955                               | 0.05476                              | 0.00030 | 0.49473                             | 0.01002 | 0.06549                             | 0.00116 | 0.02039                              | 0.00024 | 402                                  | 10 | 408                                 | 3  | 409                                 | 3  |
| KT-02-12 | 66                | 39               | 1.675                               | 0.05520                              | 0.00043 | 0.54862                             | 0.01354 | 0.07207                             | 0.00150 | 0.02339                              | 0.00035 | 420                                  | 12 | 444                                 | 4  | 449                                 | 4  |
| KT-02-13 | 50                | 48               | 1.038                               | 0.05171                              | 0.00060 | 0.32953                             | 0.00958 | 0.04618                             | 0.00076 | 0.01427                              | 0.00015 | 273                                  | 19 | 289                                 | 4  | 291                                 | 2  |
| KT-02-14 | 408               | 281              | 1.451                               | 0.05233                              | 0.00027 | 0.32276                             | 0.00582 | 0.04471                             | 0.00068 | 0.01376                              | 0.00014 | 300                                  | 9  | 284                                 | 2  | 282                                 | 2  |
| KT-02-15 | 109               | 69               | 1.578                               | 0.05485                              | 0.00037 | 0.48606                             | 0.00826 | 0.06424                             | 0.00068 | 0.01999                              | 0.00016 | 406                                  | 10 | 402                                 | 3  | 401                                 | 2  |
| KT-02-16 | 94                | 40               | 2.380                               | 0.05263                              | 0.00042 | 0.32071                             | 0.00632 | 0.04417                             | 0.00052 | 0.01410                              | 0.00012 | 313                                  | 12 | 282                                 | 2  | 279                                 | 2  |
| KT-02-17 | 83                | 44               | 1.901                               | 0.05237                              | 0.00045 | 0.39397                             | 0.00730 | 0.05458                             | 0.00066 | 0.01708                              | 0.00015 | 302                                  | 11 | 337                                 | 3  | 343                                 | 2  |
| KT-02-18 | 75                | 65               | 1.155                               | 0.05275                              | 0.00048 | 0.36717                             | 0.00776 | 0.05051                             | 0.00076 | 0.01572                              | 0.00016 | 318                                  | 12 | 318                                 | 3  | 318                                 | 2  |
| KT-02-19 | 318               | 133              | 2.381                               | 0.05606                              | 0.00023 | 0.52080                             | 0.00564 | 0.06735                             | 0.00054 | 0.02096                              | 0.00013 | 455                                  | 6  | 426                                 | 2  | 420                                 | 2  |
| KT-02-20 | 69                | 39               | 1.772                               | 0.05447                              | 0.00037 | 0.45523                             | 0.00994 | 0.06057                             | 0.00094 | 0.01998                              | 0.00025 | 390                                  | 12 | 381                                 | 3  | 379                                 | 3  |
| KT-02-21 | 69                | 40               | 1.724                               | 0.05277                              | 0.00056 | 0.33347                             | 0.00722 | 0.04586                             | 0.00050 | 0.01459                              | 0.00012 | 319                                  | 15 | 292                                 | 3  | 289                                 | 2  |
| KT-02-22 | 165               | 81               | 2.024                               | 0.05238                              | 0.00033 | 0.36911                             | 0.00604 | 0.05111                             | 0.00062 | 0.01594                              | 0.00013 | 302                                  | 9  | 319                                 | 2  | 321                                 | 2  |

| Sample   | Content (μg/g)    |                  | <sup>232</sup> Th/ <sup>238</sup> U | Isotope ratio                        |         |                                     |         |                                     |         |                                      |         | Ages (Ma)                            |    |                                     |    |                                     |    |
|----------|-------------------|------------------|-------------------------------------|--------------------------------------|---------|-------------------------------------|---------|-------------------------------------|---------|--------------------------------------|---------|--------------------------------------|----|-------------------------------------|----|-------------------------------------|----|
|          | <sup>232</sup> Th | <sup>238</sup> U |                                     | <sup>207</sup> Pb/ <sup>206</sup> Pb | 1σ      | <sup>207</sup> Pb/ <sup>235</sup> U | 1σ      | <sup>206</sup> Pb/ <sup>238</sup> U | 1σ      | <sup>208</sup> Pb/ <sup>232</sup> Th | 1σ      | <sup>207</sup> Pb/ <sup>206</sup> Pb | 1σ | <sup>207</sup> Pb/ <sup>235</sup> U | 1σ | <sup>206</sup> Pb/ <sup>238</sup> U | 1σ |
| KT-02-23 | 251               | 92               | 2.734                               | 0.05493                              | 0.00028 | 0.49823                             | 0.01014 | 0.06574                             | 0.00108 | 0.02038                              | 0.00021 | 409                                  | 10 | 411                                 | 3  | 410                                 | 3  |
| KT-02-24 | 262               | 362              | 0.725                               | 0.05177                              | 0.00029 | 0.32720                             | 0.00570 | 0.04582                             | 0.00056 | 0.01424                              | 0.00011 | 275                                  | 10 | 287                                 | 2  | 289                                 | 2  |
| KT-02-25 | 166               | 71               | 2.328                               | 0.05497                              | 0.00031 | 0.49701                             | 0.00984 | 0.06555                             | 0.00104 | 0.02021                              | 0.00022 | 411                                  | 10 | 410                                 | 3  | 409                                 | 3  |
| KT-02-26 | 57                | 51               | 1.122                               | 0.05479                              | 0.00047 | 0.49932                             | 0.01082 | 0.06608                             | 0.00086 | 0.02097                              | 0.00017 | 404                                  | 13 | 411                                 | 4  | 412                                 | 3  |
| KT-02-27 | 58                | 39               | 1.499                               | 0.05465                              | 0.00047 | 0.47692                             | 0.00968 | 0.06329                             | 0.00076 | 0.01963                              | 0.00018 | 398                                  | 13 | 396                                 | 3  | 396                                 | 2  |
| KT-02-28 | 30                | 17               | 1.801                               | 0.05138                              | 0.00085 | 0.32055                             | 0.01048 | 0.04517                             | 0.00076 | 0.01488                              | 0.00021 | 258                                  | 22 | 282                                 | 4  | 285                                 | 2  |
| KT-02-29 | 45                | 20               | 2.255                               | 0.05219                              | 0.00057 | 0.33233                             | 0.00788 | 0.04623                             | 0.00070 | 0.01498                              | 0.00018 | 294                                  | 14 | 291                                 | 3  | 291                                 | 2  |
| KT-02-30 | 260               | 43               | 6.013                               | 0.05145                              | 0.00029 | 0.32722                             | 0.00604 | 0.04612                             | 0.00070 | 0.01513                              | 0.00018 | 261                                  | 10 | 287                                 | 2  | 291                                 | 2  |
| KT-02-31 | 105               | 62               | 1.708                               | 0.05471                              | 0.00036 | 0.48495                             | 0.01126 | 0.06424                             | 0.00110 | 0.02039                              | 0.00021 | 400                                  | 12 | 401                                 | 4  | 401                                 | 3  |
| KT-02-32 | 240               | 113              | 2.128                               | 0.05241                              | 0.00027 | 0.35555                             | 0.00626 | 0.04920                             | 0.00074 | 0.01525                              | 0.00016 | 303                                  | 9  | 309                                 | 2  | 310                                 | 2  |
| KT-02-33 | 68                | 34               | 2.020                               | 0.05615                              | 0.00035 | 0.61867                             | 0.00840 | 0.07992                             | 0.00068 | 0.02319                              | 0.00020 | 458                                  | 8  | 489                                 | 3  | 496                                 | 2  |
| KT-02-34 | 41                | 33               | 1.244                               | 0.05185                              | 0.00064 | 0.31894                             | 0.01102 | 0.04459                             | 0.00098 | 0.01421                              | 0.00021 | 279                                  | 21 | 281                                 | 4  | 281                                 | 3  |
| KT-02-35 | 103               | 69               | 1.485                               | 0.05424                              | 0.00035 | 0.46097                             | 0.00770 | 0.06163                             | 0.00070 | 0.01950                              | 0.00016 | 381                                  | 9  | 385                                 | 3  | 386                                 | 2  |
| KT-02-36 | 66                | 41               | 1.609                               | 0.05484                              | 0.00045 | 0.49102                             | 0.00988 | 0.06497                             | 0.00100 | 0.02067                              | 0.00019 | 406                                  | 11 | 406                                 | 3  | 406                                 | 3  |
| KT-02-37 | 237               | 111              | 2.125                               | 0.05469                              | 0.00026 | 0.51393                             | 0.00594 | 0.06814                             | 0.00042 | 0.02128                              | 0.00012 | 400                                  | 8  | 421                                 | 2  | 425                                 | 1  |
| KT-02-38 | 199               | 111              | 1.783                               | 0.05288                              | 0.00028 | 0.37859                             | 0.00892 | 0.05188                             | 0.00098 | 0.01706                              | 0.00025 | 324                                  | 12 | 326                                 | 3  | 326                                 | 3  |
| KT-02-39 | 199               | 197              | 1.012                               | 0.05543                              | 0.00025 | 0.49876                             | 0.00722 | 0.06525                             | 0.00080 | 0.02015                              | 0.00014 | 430                                  | 7  | 411                                 | 2  | 407                                 | 2  |
| KT-02-40 | 70                | 56               | 1.261                               | 0.05470                              | 0.00043 | 0.48171                             | 0.00796 | 0.06391                             | 0.00078 | 0.02068                              | 0.00018 | 400                                  | 9  | 399                                 | 3  | 399                                 | 2  |
| KT-02-41 | 142               | 92               | 1.538                               | 0.05494                              | 0.00032 | 0.49788                             | 0.00860 | 0.06575                             | 0.00102 | 0.02005                              | 0.00021 | 410                                  | 9  | 410                                 | 3  | 411                                 | 3  |
| KT-02-42 | 81                | 32               | 2.557                               | 0.05213                              | 0.00046 | 0.32417                             | 0.00714 | 0.04508                             | 0.00058 | 0.01457                              | 0.00014 | 291                                  | 14 | 285                                 | 3  | 284                                 | 2  |
| KT-02-43 | 78                | 40               | 1.946                               | 0.05246                              | 0.00043 | 0.34311                             | 0.00598 | 0.04746                             | 0.00054 | 0.01530                              | 0.00013 | 306                                  | 10 | 300                                 | 2  | 299                                 | 2  |
| KT-02-44 | 106               | 79               | 1.352                               | 0.05223                              | 0.00053 | 0.33396                             | 0.00844 | 0.04641                             | 0.00084 | 0.01469                              | 0.00018 | 295                                  | 14 | 293                                 | 3  | 292                                 | 3  |
| KT-02-45 | 131               | 59               | 2.213                               | 0.05497                              | 0.00032 | 0.48759                             | 0.00838 | 0.06430                             | 0.00072 | 0.02068                              | 0.00018 | 411                                  | 10 | 403                                 | 3  | 402                                 | 2  |
| KT-02-46 | 186               | 45               | 4.105                               | 0.05194                              | 0.00027 | 0.32101                             | 0.00914 | 0.04482                             | 0.00120 | 0.01421                              | 0.00025 | 283                                  | 15 | 283                                 | 4  | 283                                 | 4  |

| Sample   | Content (μg/g)    |                  | <sup>232</sup> Th/ <sup>238</sup> U | Isotope ratio                        |         |                                     |         |                                     |         |                                      |         | Ages (Ma)                            |    |                                     |    |                                     |    |
|----------|-------------------|------------------|-------------------------------------|--------------------------------------|---------|-------------------------------------|---------|-------------------------------------|---------|--------------------------------------|---------|--------------------------------------|----|-------------------------------------|----|-------------------------------------|----|
|          | <sup>232</sup> Th | <sup>238</sup> U |                                     | <sup>207</sup> Pb/ <sup>206</sup> Pb | 1σ      | <sup>207</sup> Pb/ <sup>235</sup> U | 1σ      | <sup>206</sup> Pb/ <sup>238</sup> U | 1σ      | <sup>208</sup> Pb/ <sup>232</sup> Th | 1σ      | <sup>207</sup> Pb/ <sup>206</sup> Pb | 1σ | <sup>207</sup> Pb/ <sup>235</sup> U | 1σ | <sup>206</sup> Pb/ <sup>238</sup> U | 1σ |
| KT-02-47 | 77                | 48               | 1.622                               | 0.05517                              | 0.00040 | 0.51143                             | 0.00950 | 0.06725                             | 0.00094 | 0.02137                              | 0.00021 | 419                                  | 10 | 419                                 | 3  | 420                                 | 3  |
| KT-02-48 | 168               | 113              | 1.478                               | 0.05561                              | 0.00047 | 0.53678                             | 0.00898 | 0.07006                             | 0.00076 | 0.02200                              | 0.00018 | 437                                  | 10 | 436                                 | 3  | 437                                 | 2  |
| KT-02-49 | 393               | 94               | 4.181                               | 0.05521                              | 0.00022 | 0.51353                             | 0.00786 | 0.06746                             | 0.00090 | 0.02153                              | 0.00021 | 421                                  | 8  | 421                                 | 3  | 421                                 | 3  |
| KT-02-50 | 114               | 49               | 2.335                               | 0.05289                              | 0.00041 | 0.34870                             | 0.00674 | 0.04781                             | 0.00052 | 0.01516                              | 0.00014 | 324                                  | 12 | 304                                 | 3  | 301                                 | 2  |
| KT-02-51 | 212               | 108              | 1.961                               | 0.05309                              | 0.00034 | 0.38549                             | 0.00622 | 0.05265                             | 0.00050 | 0.01642                              | 0.00013 | 333                                  | 10 | 331                                 | 2  | 331                                 | 2  |
| KT-02-52 | 81                | 110              | 0.743                               | 0.05208                              | 0.00060 | 0.30826                             | 0.00770 | 0.04295                             | 0.00056 | 0.01379                              | 0.00012 | 289                                  | 17 | 273                                 | 3  | 271                                 | 2  |
| KT-02-53 | 239               | 122              | 1.954                               | 0.05499                              | 0.00028 | 0.49775                             | 0.00716 | 0.06565                             | 0.00070 | 0.02063                              | 0.00018 | 412                                  | 8  | 410                                 | 2  | 410                                 | 2  |
| KT-02-54 | 398               | 153              | 2.607                               | 0.05245                              | 0.00021 | 0.32396                             | 0.00438 | 0.04479                             | 0.00050 | 0.01406                              | 0.00010 | 305                                  | 7  | 285                                 | 2  | 282                                 | 2  |
| KT-02-55 | 294               | 135              | 2.175                               | 0.05244                              | 0.00028 | 0.34405                             | 0.00472 | 0.04758                             | 0.00044 | 0.01507                              | 0.00010 | 305                                  | 8  | 300                                 | 2  | 300                                 | 1  |
| KT-02-56 | 109               | 86               | 1.256                               | 0.05164                              | 0.00045 | 0.30310                             | 0.00598 | 0.04259                             | 0.00054 | 0.01380                              | 0.00013 | 269                                  | 12 | 269                                 | 2  | 269                                 | 2  |
| KT-02-57 | 119               | 132              | 0.901                               | 0.05328                              | 0.00043 | 0.36329                             | 0.00682 | 0.04946                             | 0.00058 | 0.01573                              | 0.00012 | 341                                  | 11 | 315                                 | 3  | 311                                 | 2  |
| KT-02-58 | 180               | 129              | 1.404                               | 0.05524                              | 0.00038 | 0.51814                             | 0.01074 | 0.06806                             | 0.00124 | 0.02090                              | 0.00021 | 422                                  | 10 | 424                                 | 4  | 424                                 | 4  |
| KT-02-59 | 234               | 51               | 4.582                               | 0.05307                              | 0.00030 | 0.36952                             | 0.00602 | 0.05048                             | 0.00058 | 0.01556                              | 0.00013 | 332                                  | 9  | 319                                 | 2  | 317                                 | 2  |
| KT-02-60 | 184               | 49               | 3.737                               | 0.05496                              | 0.00101 | 0.49419                             | 0.01602 | 0.06521                             | 0.00112 | 0.02035                              | 0.00016 | 411                                  | 42 | 408                                 | 5  | 407                                 | 3  |
| KT-02-61 | 85                | 60               | 1.412                               | 0.05539                              | 0.00048 | 0.50450                             | 0.01114 | 0.06604                             | 0.00092 | 0.02175                              | 0.00017 | 428                                  | 13 | 415                                 | 4  | 412                                 | 3  |
| KT-02-62 | 347               | 174              | 1.996                               | 0.05207                              | 0.00024 | 0.33133                             | 0.00514 | 0.04613                             | 0.00060 | 0.01456                              | 0.00012 | 289                                  | 8  | 291                                 | 2  | 291                                 | 2  |
| KT-02-63 | 178               | 93               | 1.919                               | 0.05217                              | 0.00034 | 0.33205                             | 0.00594 | 0.04616                             | 0.00064 | 0.01473                              | 0.00013 | 293                                  | 9  | 291                                 | 2  | 291                                 | 2  |
| KT-02-64 | 63                | 40               | 1.569                               | 0.05181                              | 0.00052 | 0.31145                             | 0.00732 | 0.04362                             | 0.00072 | 0.01378                              | 0.00017 | 277                                  | 13 | 275                                 | 3  | 275                                 | 2  |
| KT-02-65 | 70                | 27               | 2.598                               | 0.05294                              | 0.00056 | 0.34884                             | 0.00712 | 0.04781                             | 0.00046 | 0.01541                              | 0.00014 | 326                                  | 14 | 304                                 | 3  | 301                                 | 1  |
| KT-02-66 | 92                | 71               | 1.286                               | 0.05266                              | 0.00053 | 0.32975                             | 0.00810 | 0.04541                             | 0.00070 | 0.01441                              | 0.00015 | 314                                  | 15 | 289                                 | 3  | 286                                 | 2  |
| KT-02-67 | 105               | 189              | 0.554                               | 0.05263                              | 0.00046 | 0.31729                             | 0.00598 | 0.04373                             | 0.00046 | 0.01344                              | 0.00009 | 313                                  | 12 | 280                                 | 2  | 276                                 | 1  |
| KT-02-68 | 39                | 10               | 3.823                               | 0.05804                              | 0.00058 | 0.68318                             | 0.01550 | 0.08542                             | 0.00142 | 0.02702                              | 0.00045 | 531                                  | 12 | 529                                 | 5  | 528                                 | 4  |
| KT-02-69 | 296               | 166              | 1.776                               | 0.05237                              | 0.00030 | 0.34240                             | 0.00696 | 0.04738                             | 0.00076 | 0.01449                              | 0.00015 | 302                                  | 11 | 299                                 | 3  | 298                                 | 2  |
| KT-02-70 | 99                | 78               | 1.265                               | 0.05671                              | 0.00039 | 0.60111                             | 0.01064 | 0.07684                             | 0.00084 | 0.02351                              | 0.00016 | 480                                  | 10 | 478                                 | 3  | 477                                 | 3  |

| Sample   | Content (μg/g)    |                  | <sup>232</sup> Th/ <sup>238</sup> U | Isotope ratio                        |         |                                     |         |                                     |         |                                      |         | Ages (Ma)                            |    |                                     |    |                                     |    |
|----------|-------------------|------------------|-------------------------------------|--------------------------------------|---------|-------------------------------------|---------|-------------------------------------|---------|--------------------------------------|---------|--------------------------------------|----|-------------------------------------|----|-------------------------------------|----|
|          | <sup>232</sup> Th | <sup>238</sup> U |                                     | <sup>207</sup> Pb/ <sup>206</sup> Pb | 1σ      | <sup>207</sup> Pb/ <sup>235</sup> U | 1σ      | <sup>206</sup> Pb/ <sup>238</sup> U | 1σ      | <sup>208</sup> Pb/ <sup>232</sup> Th | 1σ      | <sup>207</sup> Pb/ <sup>206</sup> Pb | 1σ | <sup>207</sup> Pb/ <sup>235</sup> U | 1σ | <sup>206</sup> Pb/ <sup>238</sup> U | 1σ |
| KT-02-71 | 77                | 31               | 2.486                               | 0.05262                              | 0.00060 | 0.37634                             | 0.01244 | 0.05177                             | 0.00102 | 0.01723                              | 0.00024 | 312                                  | 20 | 324                                 | 5  | 325                                 | 3  |
| KT-02-72 | 328               | 51               | 6.428                               | 0.05419                              | 0.00029 | 0.46180                             | 0.01002 | 0.06179                             | 0.00120 | 0.01906                              | 0.00022 | 379                                  | 11 | 386                                 | 3  | 386                                 | 4  |
| KT-02-73 | 114               | 50               | 2.280                               | 0.05494                              | 0.00036 | 0.49286                             | 0.00846 | 0.06505                             | 0.00080 | 0.02090                              | 0.00017 | 410                                  | 9  | 407                                 | 3  | 406                                 | 2  |
| KT-02-74 | 63                | 40               | 1.583                               | 0.05306                              | 0.00065 | 0.32760                             | 0.01442 | 0.04469                             | 0.00138 | 0.01478                              | 0.00027 | 331                                  | 24 | 288                                 | 6  | 282                                 | 4  |
| KT-02-75 | 327               | 155              | 2.109                               | 0.05490                              | 0.00024 | 0.49766                             | 0.00898 | 0.06573                             | 0.00108 | 0.02067                              | 0.00020 | 408                                  | 9  | 410                                 | 3  | 410                                 | 3  |
| KT-02-76 | 55                | 43               | 1.280                               | 0.06762                              | 0.00044 | 1.30596                             | 0.02096 | 0.14002                             | 0.00138 | 0.04211                              | 0.00031 | 857                                  | 9  | 848                                 | 5  | 845                                 | 4  |
| KT-02-77 | 597               | 480              | 1.245                               | 0.05350                              | 0.00023 | 0.32766                             | 0.00488 | 0.04440                             | 0.00048 | 0.01357                              | 0.00009 | 350                                  | 8  | 288                                 | 2  | 280                                 | 1  |
| KT-02-78 | 282               | 164              | 1.719                               | 0.05562                              | 0.00028 | 0.50713                             | 0.00720 | 0.06613                             | 0.00080 | 0.02097                              | 0.00016 | 437                                  | 7  | 417                                 | 2  | 413                                 | 2  |
| KT-02-79 | 217               | 78               | 2.767                               | 0.05277                              | 0.00032 | 0.35118                             | 0.00514 | 0.04826                             | 0.00044 | 0.01614                              | 0.00013 | 319                                  | 9  | 306                                 | 2  | 304                                 | 1  |
| KT-02-80 | 80                | 75               | 1.065                               | 0.05260                              | 0.00049 | 0.31041                             | 0.00658 | 0.04279                             | 0.00046 | 0.01391                              | 0.00011 | 312                                  | 15 | 274                                 | 3  | 270                                 | 1  |
| KT-02-81 | 328               | 185              | 1.771                               | 0.05504                              | 0.00027 | 0.47901                             | 0.00640 | 0.06310                             | 0.00062 | 0.01961                              | 0.00015 | 414                                  | 7  | 397                                 | 2  | 394                                 | 2  |
| KT-02-82 | 217               | 106              | 2.057                               | 0.05308                              | 0.00034 | 0.35091                             | 0.00594 | 0.04794                             | 0.00060 | 0.01524                              | 0.00013 | 332                                  | 9  | 305                                 | 2  | 302                                 | 2  |
| KT-02-83 | 130               | 69               | 1.879                               | 0.05447                              | 0.00034 | 0.47103                             | 0.00842 | 0.06271                             | 0.00088 | 0.01968                              | 0.00023 | 390                                  | 9  | 392                                 | 3  | 392                                 | 3  |
| KT-02-84 | 344               | 160              | 2.149                               | 0.05485                              | 0.00090 | 0.46211                             | 0.01444 | 0.06111                             | 0.00060 | 0.01907                              | 0.00008 | 406                                  | 38 | 386                                 | 5  | 382                                 | 2  |
| KT-02-85 | 83                | 46               | 1.782                               | 0.05507                              | 0.00043 | 0.46908                             | 0.00854 | 0.06179                             | 0.00082 | 0.01896                              | 0.00017 | 415                                  | 10 | 391                                 | 3  | 387                                 | 2  |
| KT-02-86 | 31                | 17               | 1.804                               | 0.05141                              | 0.00137 | 0.29990                             | 0.01946 | 0.04216                             | 0.00076 | 0.01339                              | 0.00033 | 259                                  | 58 | 266                                 | 8  | 266                                 | 2  |
| KT-02-87 | 250               | 173              | 1.449                               | 0.05677                              | 0.00036 | 0.52715                             | 0.01418 | 0.06719                             | 0.00122 | 0.02179                              | 0.00029 | 483                                  | 15 | 430                                 | 5  | 419                                 | 4  |
| KT-02-88 | 182               | 224              | 0.816                               | 0.05178                              | 0.00034 | 0.29758                             | 0.00464 | 0.04166                             | 0.00040 | 0.01286                              | 0.00010 | 276                                  | 10 | 265                                 | 2  | 263                                 | 1  |
| KT-02-89 | 88                | 48               | 1.836                               | 0.05202                              | 0.00047 | 0.37981                             | 0.00838 | 0.05291                             | 0.00062 | 0.01602                              | 0.00016 | 286                                  | 15 | 327                                 | 3  | 332                                 | 2  |
| KT-02-90 | 101               | 54               | 1.881                               | 0.05283                              | 0.00050 | 0.30892                             | 0.00800 | 0.04235                             | 0.00064 | 0.01331                              | 0.00015 | 322                                  | 16 | 273                                 | 3  | 267                                 | 2  |
| KT-02-91 | 455               | 210              | 2.173                               | 0.05129                              | 0.00025 | 0.28888                             | 0.00462 | 0.04084                             | 0.00060 | 0.01249                              | 0.00013 | 254                                  | 8  | 258                                 | 2  | 258                                 | 2  |
| KT-02-92 | 46                | 37               | 1.273                               | 0.05342                              | 0.00070 | 0.31357                             | 0.01092 | 0.04260                             | 0.00112 | 0.01353                              | 0.00023 | 347                                  | 19 | 277                                 | 4  | 269                                 | 3  |
| KT-02-93 | 63                | 44               | 1.444                               | 0.05459                              | 0.00056 | 0.47801                             | 0.01252 | 0.06350                             | 0.00118 | 0.01987                              | 0.00027 | 395                                  | 14 | 397                                 | 4  | 397                                 | 4  |
| KT-02-94 | 148               | 89               | 1.672                               | 0.05251                              | 0.00041 | 0.31922                             | 0.00556 | 0.04408                             | 0.00046 | 0.01347                              | 0.00011 | 308                                  | 11 | 281                                 | 2  | 278                                 | 1  |



| Sample    | Content (μg/g)    |                  | <sup>232</sup> Th/ <sup>238</sup> U | Isotope ratio                        |         |                                     |         |                                     |         |                                      |         | Ages (Ma)                            |     |                                     |    |                                     |    |
|-----------|-------------------|------------------|-------------------------------------|--------------------------------------|---------|-------------------------------------|---------|-------------------------------------|---------|--------------------------------------|---------|--------------------------------------|-----|-------------------------------------|----|-------------------------------------|----|
|           | <sup>232</sup> Th | <sup>238</sup> U |                                     | <sup>207</sup> Pb/ <sup>206</sup> Pb | 1σ      | <sup>207</sup> Pb/ <sup>235</sup> U | 1σ      | <sup>206</sup> Pb/ <sup>238</sup> U | 1σ      | <sup>208</sup> Pb/ <sup>232</sup> Th | 1σ      | <sup>207</sup> Pb/ <sup>206</sup> Pb | 1σ  | <sup>207</sup> Pb/ <sup>235</sup> U | 1σ | <sup>206</sup> Pb/ <sup>238</sup> U | 1σ |
| KT-02-95  | 40                | 17               | 2.281                               | 0.05292                              | 0.00059 | 0.34251                             | 0.00898 | 0.04692                             | 0.00066 | 0.01498                              | 0.00022 | 325                                  | 17  | 299                                 | 3  | 296                                 | 2  |
| KT-02-96  | 472               | 151              | 3.128                               | 0.05453                              | 0.00024 | 0.47520                             | 0.00982 | 0.06317                             | 0.00122 | 0.01931                              | 0.00022 | 393                                  | 10  | 395                                 | 3  | 395                                 | 4  |
| KT-02-97  | 209               | 90               | 2.325                               | 0.05472                              | 0.00031 | 0.47174                             | 0.00666 | 0.06250                             | 0.00060 | 0.01969                              | 0.00017 | 401                                  | 8   | 392                                 | 2  | 391                                 | 2  |
| KT-02-98  | 193               | 111              | 1.732                               | 0.05449                              | 0.00034 | 0.45540                             | 0.00718 | 0.06059                             | 0.00062 | 0.01897                              | 0.00015 | 391                                  | 9   | 381                                 | 3  | 379                                 | 2  |
| KT-02-99  | 178               | 126              | 1.415                               | 0.05719                              | 0.00033 | 0.62683                             | 0.01400 | 0.07947                             | 0.00156 | 0.02487                              | 0.00033 | 499                                  | 11  | 494                                 | 4  | 493                                 | 5  |
| KT-02-100 | 77                | 82               | 0.943                               | 0.05232                              | 0.00063 | 0.31187                             | 0.00890 | 0.04320                             | 0.00058 | 0.01356                              | 0.00015 | 299                                  | 21  | 276                                 | 3  | 273                                 | 2  |
| KT-03     |                   |                  |                                     |                                      |         |                                     |         |                                     |         |                                      |         |                                      |     |                                     |    |                                     |    |
| KT-03-1   | 92                | 67               | 1.377                               | 0.05302                              | 0.00046 | 0.34327                             | 0.00666 | 0.04695                             | 0.00040 | 0.01430                              | 0.00009 | 330                                  | 14  | 300                                 | 3  | 296                                 | 1  |
| KT-03-2   | 38                | 25               | 1.500                               | 0.05254                              | 0.00069 | 0.30330                             | 0.00882 | 0.04186                             | 0.00060 | 0.01298                              | 0.00015 | 309                                  | 20  | 269                                 | 3  | 264                                 | 2  |
| KT-03-3   | 311               | 166              | 1.875                               | 0.05286                              | 0.00021 | 0.37149                             | 0.00580 | 0.05096                             | 0.00066 | 0.01593                              | 0.00014 | 323                                  | 8   | 321                                 | 2  | 320                                 | 2  |
| KT-03-4   | 35                | 23               | 1.526                               | 0.05494                              | 0.00078 | 0.37474                             | 0.01514 | 0.04937                             | 0.00080 | 0.01561                              | 0.00019 | 410                                  | 31  | 323                                 | 6  | 311                                 | 2  |
| KT-03-5   | 309               | 114              | 2.715                               | 0.05306                              | 0.00024 | 0.34336                             | 0.00432 | 0.04693                             | 0.00044 | 0.01446                              | 0.00010 | 331                                  | 7   | 300                                 | 2  | 296                                 | 1  |
| KT-03-6   | 44                | 23               | 1.887                               | 0.05661                              | 0.00049 | 0.54741                             | 0.01066 | 0.07015                             | 0.00084 | 0.02147                              | 0.00020 | 476                                  | 11  | 443                                 | 3  | 437                                 | 3  |
| KT-03-7   | 33                | 21               | 1.558                               | 0.05488                              | 0.00305 | 0.30911                             | 0.03392 | 0.04085                             | 0.00068 | 0.01275                              | 0.00007 | 407                                  | 128 | 273                                 | 13 | 258                                 | 2  |
| KT-03-8   | 43                | 38               | 1.143                               | 0.05370                              | 0.00067 | 0.36050                             | 0.01030 | 0.04867                             | 0.00060 | 0.01524                              | 0.00016 | 358                                  | 21  | 313                                 | 4  | 306                                 | 2  |
| KT-03-9   | 85                | 107              | 0.801                               | 0.05287                              | 0.00038 | 0.34736                             | 0.00658 | 0.04764                             | 0.00058 | 0.01473                              | 0.00013 | 323                                  | 11  | 303                                 | 2  | 300                                 | 2  |
| KT-03-10  | 171               | 102              | 1.676                               | 0.05233                              | 0.00030 | 0.33166                             | 0.00492 | 0.04596                             | 0.00044 | 0.01433                              | 0.00012 | 300                                  | 9   | 291                                 | 2  | 290                                 | 1  |
| KT-03-11  | 130               | 165              | 0.785                               | 0.05219                              | 0.00033 | 0.32497                             | 0.00562 | 0.04516                             | 0.00054 | 0.01394                              | 0.00013 | 294                                  | 10  | 286                                 | 2  | 285                                 | 2  |
| KT-03-12  | 61                | 21               | 2.927                               | 0.05324                              | 0.00058 | 0.35818                             | 0.00958 | 0.04877                             | 0.00066 | 0.01522                              | 0.00019 | 339                                  | 18  | 311                                 | 4  | 307                                 | 2  |
| KT-03-13  | 52                | 35               | 1.493                               | 0.05303                              | 0.00049 | 0.34441                             | 0.00732 | 0.04711                             | 0.00052 | 0.01468                              | 0.00014 | 330                                  | 14  | 301                                 | 3  | 297                                 | 2  |
| KT-03-14  | 161               | 153              | 1.056                               | 0.05329                              | 0.00026 | 0.39556                             | 0.00516 | 0.05384                             | 0.00050 | 0.01674                              | 0.00011 | 341                                  | 7   | 338                                 | 2  | 338                                 | 2  |
| KT-03-15  | 124               | 55               | 2.239                               | 0.05314                              | 0.00035 | 0.33625                             | 0.00622 | 0.04588                             | 0.00048 | 0.01443                              | 0.00013 | 335                                  | 12  | 294                                 | 2  | 289                                 | 1  |
| KT-03-16  | 144               | 174              | 0.829                               | 0.05267                              | 0.00033 | 0.33558                             | 0.00606 | 0.04620                             | 0.00058 | 0.01400                              | 0.00011 | 315                                  | 10  | 294                                 | 2  | 291                                 | 2  |
| KT-03-17  | 135               | 121              | 1.119                               | 0.05191                              | 0.00036 | 0.32362                             | 0.00596 | 0.04523                             | 0.00064 | 0.01390                              | 0.00013 | 282                                  | 10  | 285                                 | 2  | 285                                 | 2  |

| Sample   | Content (μg/g)    |                  | <sup>232</sup> Th/ <sup>238</sup> U | Isotope ratio                        |         |                                     |         |                                     |         |                                      |         | Ages (Ma)                            |    |                                     |    |                                     |    |
|----------|-------------------|------------------|-------------------------------------|--------------------------------------|---------|-------------------------------------|---------|-------------------------------------|---------|--------------------------------------|---------|--------------------------------------|----|-------------------------------------|----|-------------------------------------|----|
|          | <sup>232</sup> Th | <sup>238</sup> U |                                     | <sup>207</sup> Pb/ <sup>206</sup> Pb | 1σ      | <sup>207</sup> Pb/ <sup>235</sup> U | 1σ      | <sup>206</sup> Pb/ <sup>238</sup> U | 1σ      | <sup>208</sup> Pb/ <sup>232</sup> Th | 1σ      | <sup>207</sup> Pb/ <sup>206</sup> Pb | 1σ | <sup>207</sup> Pb/ <sup>235</sup> U | 1σ | <sup>206</sup> Pb/ <sup>238</sup> U | 1σ |
| KT-03-18 | 119               | 58               | 2.036                               | 0.05253                              | 0.00038 | 0.36477                             | 0.00796 | 0.05033                             | 0.00068 | 0.01508                              | 0.00016 | 309                                  | 13 | 316                                 | 3  | 317                                 | 2  |
| KT-03-19 | 107               | 64               | 1.666                               | 0.05332                              | 0.00038 | 0.40463                             | 0.01228 | 0.05502                             | 0.00144 | 0.01777                              | 0.00034 | 343                                  | 15 | 345                                 | 4  | 345                                 | 4  |
| KT-03-20 | 175               | 92               | 1.911                               | 0.05300                              | 0.00027 | 0.38343                             | 0.00558 | 0.05248                             | 0.00062 | 0.01644                              | 0.00014 | 329                                  | 8  | 330                                 | 2  | 330                                 | 2  |
| KT-03-21 | 54                | 49               | 1.098                               | 0.05440                              | 0.00059 | 0.37694                             | 0.00822 | 0.05028                             | 0.00050 | 0.01579                              | 0.00011 | 388                                  | 16 | 325                                 | 3  | 316                                 | 2  |
| KT-03-22 | 128               | 80               | 1.600                               | 0.05575                              | 0.00026 | 0.54183                             | 0.00740 | 0.07049                             | 0.00078 | 0.02142                              | 0.00017 | 442                                  | 7  | 440                                 | 2  | 439                                 | 2  |
| KT-03-23 | 85                | 79               | 1.072                               | 0.05382                              | 0.00048 | 0.35551                             | 0.00712 | 0.04793                             | 0.00066 | 0.01485                              | 0.00014 | 364                                  | 11 | 309                                 | 3  | 302                                 | 2  |
| KT-03-24 | 218               | 116              | 1.882                               | 0.05320                              | 0.00023 | 0.38480                             | 0.00606 | 0.05244                             | 0.00068 | 0.01619                              | 0.00014 | 337                                  | 8  | 331                                 | 2  | 329                                 | 2  |
| KT-03-25 | 49                | 32               | 1.515                               | 0.05263                              | 0.00045 | 0.35913                             | 0.00642 | 0.04949                             | 0.00040 | 0.01496                              | 0.00011 | 313                                  | 13 | 312                                 | 2  | 311                                 | 1  |
| KT-03-26 | 242               | 126              | 1.923                               | 0.05345                              | 0.00023 | 0.38903                             | 0.00636 | 0.05278                             | 0.00072 | 0.01633                              | 0.00014 | 348                                  | 8  | 334                                 | 2  | 332                                 | 2  |
| KT-03-27 | 104               | 125              | 0.839                               | 0.05363                              | 0.00043 | 0.33661                             | 0.00836 | 0.04550                             | 0.00082 | 0.01373                              | 0.00017 | 355                                  | 13 | 295                                 | 3  | 287                                 | 3  |
| KT-03-28 | 478               | 161              | 2.965                               | 0.05289                              | 0.00019 | 0.37484                             | 0.00416 | 0.05140                             | 0.00052 | 0.01615                              | 0.00011 | 324                                  | 6  | 323                                 | 2  | 323                                 | 2  |
| KT-03-29 | 61                | 43               | 1.411                               | 0.05362                              | 0.00045 | 0.34427                             | 0.00652 | 0.04659                             | 0.00056 | 0.01435                              | 0.00015 | 355                                  | 11 | 300                                 | 2  | 294                                 | 2  |
| KT-03-30 | 247               | 128              | 1.934                               | 0.05359                              | 0.00025 | 0.41268                             | 0.00766 | 0.05583                             | 0.00088 | 0.01755                              | 0.00017 | 354                                  | 9  | 351                                 | 3  | 350                                 | 3  |
| KT-03-31 | 55                | 43               | 1.264                               | 0.05353                              | 0.00038 | 0.38970                             | 0.00650 | 0.05282                             | 0.00062 | 0.01664                              | 0.00014 | 351                                  | 9  | 334                                 | 2  | 332                                 | 2  |
| KT-03-32 | 208               | 115              | 1.815                               | 0.05324                              | 0.00029 | 0.34936                             | 0.00824 | 0.04754                             | 0.00086 | 0.01482                              | 0.00019 | 339                                  | 12 | 304                                 | 3  | 299                                 | 3  |
| KT-03-33 | 87                | 57               | 1.534                               | 0.05517                              | 0.00034 | 0.51058                             | 0.00974 | 0.06710                             | 0.00096 | 0.02073                              | 0.00018 | 419                                  | 10 | 419                                 | 3  | 419                                 | 3  |
| KT-03-34 | 301               | 224              | 1.348                               | 0.05366                              | 0.00022 | 0.41969                             | 0.00872 | 0.05674                             | 0.00118 | 0.01732                              | 0.00022 | 357                                  | 11 | 356                                 | 3  | 356                                 | 4  |
| KT-03-35 | 196               | 51               | 3.839                               | 0.05270                              | 0.00037 | 0.34388                             | 0.01304 | 0.04731                             | 0.00164 | 0.01382                              | 0.00021 | 316                                  | 19 | 300                                 | 5  | 298                                 | 5  |
| KT-03-36 | 359               | 343              | 1.046                               | 0.05248                              | 0.00021 | 0.32010                             | 0.00600 | 0.04423                             | 0.00076 | 0.01331                              | 0.00015 | 306                                  | 10 | 282                                 | 2  | 279                                 | 2  |
| KT-03-37 | 249               | 81               | 3.090                               | 0.05274                              | 0.00021 | 0.38069                             | 0.00760 | 0.05233                             | 0.00094 | 0.01634                              | 0.00018 | 318                                  | 10 | 328                                 | 3  | 329                                 | 3  |
| KT-03-38 | 248               | 128              | 1.937                               | 0.05316                              | 0.00020 | 0.39086                             | 0.00910 | 0.05329                             | 0.00112 | 0.01641                              | 0.00021 | 336                                  | 12 | 335                                 | 3  | 335                                 | 3  |
| KT-03-39 | 111               | 53               | 2.074                               | 0.05379                              | 0.00034 | 0.41314                             | 0.00804 | 0.05572                             | 0.00094 | 0.01775                              | 0.00020 | 362                                  | 10 | 351                                 | 3  | 350                                 | 3  |
| KT-03-40 | 80                | 30               | 2.635                               | 0.05597                              | 0.00035 | 0.56646                             | 0.00940 | 0.07342                             | 0.00096 | 0.02271                              | 0.00021 | 451                                  | 8  | 456                                 | 3  | 457                                 | 3  |
| KT-03-41 | 140               | 59               | 2.388                               | 0.05293                              | 0.00034 | 0.37889                             | 0.01112 | 0.05194                             | 0.00148 | 0.01607                              | 0.00029 | 326                                  | 15 | 326                                 | 4  | 326                                 | 5  |

| Sample   | Content (μg/g)    |                  | <sup>232</sup> Th/ <sup>238</sup> U | Isotope ratio                        |         |                                     |         |                                     |         |                                      |         | Ages (Ma)                            |    |                                     |    |                                     |    |
|----------|-------------------|------------------|-------------------------------------|--------------------------------------|---------|-------------------------------------|---------|-------------------------------------|---------|--------------------------------------|---------|--------------------------------------|----|-------------------------------------|----|-------------------------------------|----|
|          | <sup>232</sup> Th | <sup>238</sup> U |                                     | <sup>207</sup> Pb/ <sup>206</sup> Pb | 1σ      | <sup>207</sup> Pb/ <sup>235</sup> U | 1σ      | <sup>206</sup> Pb/ <sup>238</sup> U | 1σ      | <sup>208</sup> Pb/ <sup>232</sup> Th | 1σ      | <sup>207</sup> Pb/ <sup>206</sup> Pb | 1σ | <sup>207</sup> Pb/ <sup>235</sup> U | 1σ | <sup>206</sup> Pb/ <sup>238</sup> U | 1σ |
| KT-03-42 | 460               | 162              | 2.839                               | 0.05292                              | 0.00018 | 0.37577                             | 0.00526 | 0.05149                             | 0.00066 | 0.01564                              | 0.00012 | 325                                  | 7  | 324                                 | 2  | 324                                 | 2  |
| KT-03-43 | 170               | 72               | 2.354                               | 0.05390                              | 0.00030 | 0.43586                             | 0.00968 | 0.05861                             | 0.00104 | 0.01864                              | 0.00024 | 367                                  | 11 | 367                                 | 3  | 367                                 | 3  |
| KT-03-44 | 215               | 143              | 1.500                               | 0.05273                              | 0.00024 | 0.36185                             | 0.00618 | 0.04979                             | 0.00084 | 0.01576                              | 0.00017 | 317                                  | 9  | 314                                 | 2  | 313                                 | 3  |
| KT-03-45 | 80                | 71               | 1.124                               | 0.05396                              | 0.00075 | 0.36744                             | 0.01418 | 0.04927                             | 0.00078 | 0.01539                              | 0.00016 | 369                                  | 29 | 318                                 | 5  | 310                                 | 2  |
| KT-03-46 | 46                | 50               | 0.924                               | 0.05364                              | 0.00043 | 0.39680                             | 0.00700 | 0.05365                             | 0.00048 | 0.01693                              | 0.00010 | 356                                  | 12 | 339                                 | 3  | 337                                 | 1  |
| KT-03-47 | 267               | 155              | 1.722                               | 0.05335                              | 0.00023 | 0.40729                             | 0.00670 | 0.05538                             | 0.00088 | 0.01753                              | 0.00019 | 344                                  | 8  | 347                                 | 2  | 347                                 | 3  |
| KT-03-48 | 129               | 62               | 2.073                               | 0.05589                              | 0.00028 | 0.55879                             | 0.01382 | 0.07243                             | 0.00142 | 0.02274                              | 0.00031 | 448                                  | 13 | 451                                 | 4  | 451                                 | 4  |
| KT-03-49 | 159               | 119              | 1.338                               | 0.05229                              | 0.00027 | 0.34142                             | 0.00732 | 0.04736                             | 0.00092 | 0.01460                              | 0.00017 | 298                                  | 11 | 298                                 | 3  | 298                                 | 3  |
| KT-03-50 | 45                | 47               | 0.954                               | 0.05301                              | 0.00057 | 0.33306                             | 0.01008 | 0.04555                             | 0.00094 | 0.01394                              | 0.00018 | 329                                  | 17 | 292                                 | 4  | 287                                 | 3  |
| KT-03-51 | 55                | 34               | 1.631                               | 0.05361                              | 0.00047 | 0.42573                             | 0.01068 | 0.05755                             | 0.00094 | 0.01825                              | 0.00024 | 355                                  | 15 | 360                                 | 4  | 361                                 | 3  |
| KT-03-52 | 176               | 96               | 1.835                               | 0.05322                              | 0.00027 | 0.36616                             | 0.00550 | 0.04989                             | 0.00060 | 0.01627                              | 0.00014 | 338                                  | 8  | 317                                 | 2  | 314                                 | 2  |
| KT-03-53 | 20                | 10               | 2.019                               | 0.05510                              | 0.00082 | 0.42904                             | 0.01302 | 0.05653                             | 0.00082 | 0.01783                              | 0.00021 | 416                                  | 21 | 362                                 | 5  | 354                                 | 2  |
| KT-03-54 | 107               | 64               | 1.671                               | 0.05233                              | 0.00040 | 0.36197                             | 0.00828 | 0.05017                             | 0.00090 | 0.01591                              | 0.00018 | 300                                  | 12 | 314                                 | 3  | 316                                 | 3  |
| KT-03-55 | 194               | 92               | 2.108                               | 0.05263                              | 0.00028 | 0.36064                             | 0.00636 | 0.04968                             | 0.00070 | 0.01558                              | 0.00014 | 313                                  | 9  | 313                                 | 2  | 313                                 | 2  |
| KT-03-56 | 75                | 70               | 1.072                               | 0.05387                              | 0.00044 | 0.42975                             | 0.00814 | 0.05784                             | 0.00060 | 0.01817                              | 0.00012 | 366                                  | 12 | 363                                 | 3  | 362                                 | 2  |
| KT-03-57 | 177               | 94               | 1.897                               | 0.05365                              | 0.00027 | 0.42539                             | 0.00516 | 0.05749                             | 0.00050 | 0.01840                              | 0.00010 | 356                                  | 7  | 360                                 | 2  | 360                                 | 1  |
| KT-03-58 | 323               | 186              | 1.733                               | 0.05351                              | 0.00019 | 0.40804                             | 0.00600 | 0.05529                             | 0.00076 | 0.01751                              | 0.00016 | 350                                  | 7  | 347                                 | 2  | 347                                 | 2  |
| KT-03-59 | 78                | 28               | 2.748                               | 0.05369                              | 0.00048 | 0.36295                             | 0.00830 | 0.04902                             | 0.00078 | 0.01559                              | 0.00019 | 358                                  | 13 | 314                                 | 3  | 309                                 | 2  |
| KT-03-60 | 53                | 17               | 3.035                               | 0.05454                              | 0.00060 | 0.43522                             | 0.01354 | 0.05787                             | 0.00134 | 0.01855                              | 0.00031 | 393                                  | 17 | 367                                 | 5  | 363                                 | 4  |
| KT-03-61 | 167               | 173              | 0.964                               | 0.05485                              | 0.00026 | 0.48471                             | 0.00620 | 0.06407                             | 0.00066 | 0.01988                              | 0.00013 | 406                                  | 7  | 401                                 | 2  | 400                                 | 2  |
| KT-03-62 | 64                | 42               | 1.538                               | 0.05301                              | 0.00043 | 0.34209                             | 0.00720 | 0.04680                             | 0.00068 | 0.01476                              | 0.00015 | 329                                  | 12 | 299                                 | 3  | 295                                 | 2  |
| KT-03-63 | 82                | 54               | 1.510                               | 0.05246                              | 0.00041 | 0.35094                             | 0.00728 | 0.04850                             | 0.00068 | 0.01513                              | 0.00013 | 306                                  | 12 | 305                                 | 3  | 305                                 | 2  |
| KT-03-64 | 8                 | 4                | 2.144                               | 0.05989                              | 0.00146 | 0.55047                             | 0.02998 | 0.06672                             | 0.00172 | 0.02141                              | 0.00069 | 600                                  | 37 | 445                                 | 10 | 416                                 | 5  |
| KT-03-65 | 51                | 22               | 2.340                               | 0.05384                              | 0.00060 | 0.42572                             | 0.01136 | 0.05732                             | 0.00086 | 0.01873                              | 0.00023 | 364                                  | 17 | 360                                 | 4  | 359                                 | 3  |

| Sample   | Content (μg/g)    |                  | <sup>232</sup> Th/ <sup>238</sup> U | Isotope ratio                        |         |                                     |         |                                     |         |                                      |         | Ages (Ma)                            |    |                                     |    |                                     |    |
|----------|-------------------|------------------|-------------------------------------|--------------------------------------|---------|-------------------------------------|---------|-------------------------------------|---------|--------------------------------------|---------|--------------------------------------|----|-------------------------------------|----|-------------------------------------|----|
|          | <sup>232</sup> Th | <sup>238</sup> U |                                     | <sup>207</sup> Pb/ <sup>206</sup> Pb | 1σ      | <sup>207</sup> Pb/ <sup>235</sup> U | 1σ      | <sup>206</sup> Pb/ <sup>238</sup> U | 1σ      | <sup>208</sup> Pb/ <sup>232</sup> Th | 1σ      | <sup>207</sup> Pb/ <sup>206</sup> Pb | 1σ | <sup>207</sup> Pb/ <sup>235</sup> U | 1σ | <sup>206</sup> Pb/ <sup>238</sup> U | 1σ |
| KT-03-66 | 92                | 76               | 1.214                               | 0.05367                              | 0.00036 | 0.40029                             | 0.00718 | 0.05407                             | 0.00074 | 0.01675                              | 0.00015 | 357                                  | 9  | 342                                 | 3  | 339                                 | 2  |
| KT-03-67 | 46                | 48               | 0.943                               | 0.05549                              | 0.00104 | 0.33017                             | 0.01392 | 0.04323                             | 0.00102 | 0.01318                              | 0.00018 | 432                                  | 26 | 290                                 | 5  | 273                                 | 3  |
| KT-03-68 | 69                | 36               | 1.915                               | 0.05383                              | 0.00037 | 0.42817                             | 0.00906 | 0.05765                             | 0.00090 | 0.01868                              | 0.00023 | 364                                  | 11 | 362                                 | 3  | 361                                 | 3  |
| KT-03-69 | 182               | 88               | 2.062                               | 0.05246                              | 0.00028 | 0.35388                             | 0.00776 | 0.04890                             | 0.00092 | 0.01554                              | 0.00020 | 305                                  | 11 | 308                                 | 3  | 308                                 | 3  |
| KT-03-70 | 121               | 98               | 1.243                               | 0.05345                              | 0.00036 | 0.35318                             | 0.00850 | 0.04790                             | 0.00096 | 0.01494                              | 0.00019 | 348                                  | 12 | 307                                 | 3  | 302                                 | 3  |
| KT-03-71 | 177               | 98               | 1.810                               | 0.05315                              | 0.00028 | 0.41108                             | 0.00840 | 0.05607                             | 0.00102 | 0.01769                              | 0.00021 | 335                                  | 10 | 350                                 | 3  | 352                                 | 3  |
| KT-03-72 | 91                | 62               | 1.475                               | 0.05507                              | 0.00049 | 0.41953                             | 0.00880 | 0.05527                             | 0.00080 | 0.01726                              | 0.00017 | 415                                  | 12 | 356                                 | 3  | 347                                 | 2  |
| KT-03-73 | 191               | 69               | 2.767                               | 0.05374                              | 0.00027 | 0.42490                             | 0.00578 | 0.05733                             | 0.00060 | 0.01799                              | 0.00013 | 360                                  | 7  | 360                                 | 2  | 359                                 | 2  |
| KT-03-74 | 137               | 68               | 2.007                               | 0.05285                              | 0.00027 | 0.36679                             | 0.00746 | 0.05031                             | 0.00086 | 0.01526                              | 0.00015 | 322                                  | 10 | 317                                 | 3  | 316                                 | 3  |
| KT-03-75 | 232               | 126              | 1.843                               | 0.05336                              | 0.00028 | 0.37445                             | 0.00996 | 0.05086                             | 0.00120 | 0.01561                              | 0.00024 | 344                                  | 13 | 323                                 | 4  | 320                                 | 4  |
| KT-03-76 | 50                | 34               | 1.472                               | 0.05332                              | 0.00052 | 0.33412                             | 0.00948 | 0.04541                             | 0.00084 | 0.01393                              | 0.00015 | 343                                  | 16 | 293                                 | 4  | 286                                 | 3  |
| KT-03-77 | 148               | 172              | 0.856                               | 0.05290                              | 0.00032 | 0.35542                             | 0.00562 | 0.04873                             | 0.00060 | 0.01463                              | 0.00012 | 324                                  | 8  | 309                                 | 2  | 307                                 | 2  |
| KT-03-78 | 239               | 234              | 1.024                               | 0.05227                              | 0.00022 | 0.33999                             | 0.00630 | 0.04717                             | 0.00084 | 0.01457                              | 0.00018 | 297                                  | 10 | 297                                 | 2  | 297                                 | 3  |
| KT-03-79 | 41                | 37               | 1.096                               | 0.05426                              | 0.00057 | 0.36826                             | 0.00956 | 0.04919                             | 0.00068 | 0.01501                              | 0.00014 | 382                                  | 17 | 318                                 | 4  | 310                                 | 2  |
| KT-03-80 | 120               | 80               | 1.496                               | 0.05354                              | 0.00032 | 0.41161                             | 0.00796 | 0.05573                             | 0.00084 | 0.01665                              | 0.00016 | 352                                  | 10 | 350                                 | 3  | 350                                 | 3  |
| KT-03-81 | 43                | 30               | 1.444                               | 0.05377                              | 0.00047 | 0.37571                             | 0.00818 | 0.05065                             | 0.00056 | 0.01561                              | 0.00013 | 361                                  | 15 | 324                                 | 3  | 319                                 | 2  |
| KT-03-82 | 299               | 111              | 2.703                               | 0.05385                              | 0.00025 | 0.38935                             | 0.00688 | 0.05241                             | 0.00070 | 0.01632                              | 0.00014 | 365                                  | 9  | 334                                 | 3  | 329                                 | 2  |
| KT-03-83 | 64                | 39               | 1.623                               | 0.05219                              | 0.00051 | 0.33852                             | 0.00810 | 0.04703                             | 0.00060 | 0.01398                              | 0.00013 | 294                                  | 16 | 296                                 | 3  | 296                                 | 2  |
| KT-03-84 | 205               | 99               | 2.077                               | 0.05218                              | 0.00026 | 0.33813                             | 0.00678 | 0.04700                             | 0.00086 | 0.01427                              | 0.00019 | 293                                  | 10 | 296                                 | 3  | 296                                 | 3  |
| KT-03-85 | 52                | 27               | 1.949                               | 0.05413                              | 0.00059 | 0.39751                             | 0.01410 | 0.05325                             | 0.00150 | 0.01616                              | 0.00028 | 377                                  | 18 | 340                                 | 5  | 334                                 | 5  |
| KT-03-86 | 191               | 85               | 2.246                               | 0.05468                              | 0.00027 | 0.51168                             | 0.01242 | 0.06786                             | 0.00152 | 0.02034                              | 0.00027 | 399                                  | 12 | 420                                 | 4  | 423                                 | 5  |
| KT-03-87 | 109               | 71               | 1.540                               | 0.05241                              | 0.00033 | 0.35397                             | 0.00988 | 0.04896                             | 0.00116 | 0.01488                              | 0.00023 | 303                                  | 14 | 308                                 | 4  | 308                                 | 4  |
| KT-03-88 | 92                | 71               | 1.306                               | 0.05259                              | 0.00040 | 0.35544                             | 0.00696 | 0.04902                             | 0.00064 | 0.01484                              | 0.00013 | 311                                  | 11 | 309                                 | 3  | 309                                 | 2  |
| KT-03-89 | 312               | 197              | 1.584                               | 0.05318                              | 0.00018 | 0.39197                             | 0.00572 | 0.05346                             | 0.00074 | 0.01628                              | 0.00014 | 336                                  | 7  | 336                                 | 2  | 336                                 | 2  |

| Sample   | Content (μg/g)    |                  | <sup>232</sup> Th/ <sup>238</sup> U | Isotope ratio                        |         |                                     |         |                                     |         |                                      |         | Ages (Ma)                            |    |                                     |    |                                     |    |
|----------|-------------------|------------------|-------------------------------------|--------------------------------------|---------|-------------------------------------|---------|-------------------------------------|---------|--------------------------------------|---------|--------------------------------------|----|-------------------------------------|----|-------------------------------------|----|
|          | <sup>232</sup> Th | <sup>238</sup> U |                                     | <sup>207</sup> Pb/ <sup>206</sup> Pb | 1σ      | <sup>207</sup> Pb/ <sup>235</sup> U | 1σ      | <sup>206</sup> Pb/ <sup>238</sup> U | 1σ      | <sup>208</sup> Pb/ <sup>232</sup> Th | 1σ      | <sup>207</sup> Pb/ <sup>206</sup> Pb | 1σ | <sup>207</sup> Pb/ <sup>235</sup> U | 1σ | <sup>206</sup> Pb/ <sup>238</sup> U | 1σ |
| KT-03-90 | 133               | 92               | 1.448                               | 0.05261                              | 0.00027 | 0.35089                             | 0.00730 | 0.04837                             | 0.00086 | 0.01523                              | 0.00017 | 312                                  | 11 | 305                                 | 3  | 304                                 | 3  |
| KT-03-91 | 233               | 117              | 1.993                               | 0.05277                              | 0.00021 | 0.39878                             | 0.00750 | 0.05478                             | 0.00082 | 0.01685                              | 0.00017 | 319                                  | 10 | 341                                 | 3  | 344                                 | 2  |
| KT-03-92 | 91                | 52               | 1.748                               | 0.05325                              | 0.00051 | 0.41835                             | 0.00982 | 0.05696                             | 0.00060 | 0.01791                              | 0.00019 | 340                                  | 17 | 355                                 | 4  | 357                                 | 2  |
| KT-03-93 | 304               | 127              | 2.384                               | 0.05449                              | 0.00031 | 0.44440                             | 0.01018 | 0.05909                             | 0.00098 | 0.01866                              | 0.00022 | 391                                  | 12 | 373                                 | 4  | 370                                 | 3  |
| KT-03-94 | 442               | 155              | 2.851                               | 0.05277                              | 0.00020 | 0.36915                             | 0.00818 | 0.05073                             | 0.00106 | 0.01569                              | 0.00023 | 319                                  | 11 | 319                                 | 3  | 319                                 | 3  |
| KT-03-95 | 49                | 57               | 0.858                               | 0.05548                              | 0.00057 | 0.38116                             | 0.00868 | 0.04981                             | 0.00046 | 0.01545                              | 0.00010 | 432                                  | 17 | 328                                 | 3  | 313                                 | 1  |
| KT-03-96 | 63                | 47               | 1.329                               | 0.05314                              | 0.00047 | 0.37777                             | 0.00702 | 0.05158                             | 0.00048 | 0.01628                              | 0.00011 | 335                                  | 13 | 325                                 | 3  | 324                                 | 1  |
| KT-05    |                   |                  |                                     |                                      |         |                                     |         |                                     |         |                                      |         |                                      |    |                                     |    |                                     |    |
| KT-05-1  | 136               | 183              | 0.746                               | 0.04966                              | 0.00048 | 0.19301                             | 0.00404 | 0.02819                             | 0.00020 | 0.00916                              | 0.00007 | 179                                  | 18 | 179                                 | 2  | 179                                 | 1  |
| KT-05-2  | 424               | 248              | 1.711                               | 0.05584                              | 0.00039 | 0.23793                             | 0.00406 | 0.03090                             | 0.00022 | 0.01027                              | 0.00007 | 446                                  | 13 | 217                                 | 2  | 196                                 | 1  |
| KT-05-3  | 251               | 89               | 2.816                               | 0.05149                              | 0.00034 | 0.29221                             | 0.00504 | 0.04116                             | 0.00042 | 0.01409                              | 0.00011 | 263                                  | 11 | 260                                 | 2  | 260                                 | 1  |
| KT-05-4  | 330               | 221              | 1.493                               | 0.05034                              | 0.00036 | 0.19430                             | 0.00504 | 0.02796                             | 0.00050 | 0.00907                              | 0.00011 | 211                                  | 15 | 180                                 | 2  | 178                                 | 2  |
| KT-05-5  | 304               | 200              | 1.523                               | 0.04967                              | 0.00034 | 0.19793                             | 0.00324 | 0.02889                             | 0.00020 | 0.00885                              | 0.00006 | 180                                  | 13 | 183                                 | 1  | 184                                 | 1  |
| KT-05-6  | 236               | 227              | 1.041                               | 0.04964                              | 0.00035 | 0.19067                             | 0.00362 | 0.02785                             | 0.00032 | 0.00854                              | 0.00008 | 178                                  | 12 | 177                                 | 2  | 177                                 | 1  |
| KT-05-7  | 194               | 180              | 1.079                               | 0.05541                              | 0.00025 | 0.54550                             | 0.01126 | 0.07143                             | 0.00142 | 0.02197                              | 0.00027 | 429                                  | 10 | 442                                 | 4  | 445                                 | 4  |
| KT-05-8  | 276               | 219              | 1.259                               | 0.05300                              | 0.00022 | 0.42340                             | 0.00466 | 0.05794                             | 0.00046 | 0.01830                              | 0.00013 | 329                                  | 6  | 358                                 | 2  | 363                                 | 1  |
| KT-05-9  | 373               | 250              | 1.488                               | 0.04965                              | 0.00025 | 0.18879                             | 0.00230 | 0.02758                             | 0.00018 | 0.00854                              | 0.00005 | 178                                  | 8  | 176                                 | 1  | 175                                 | 1  |
| KT-05-10 | 337               | 253              | 1.330                               | 0.04945                              | 0.00026 | 0.19515                             | 0.00242 | 0.02862                             | 0.00022 | 0.00901                              | 0.00006 | 169                                  | 7  | 181                                 | 1  | 182                                 | 1  |
| KT-05-11 | 176               | 112              | 1.577                               | 0.05009                              | 0.00041 | 0.20241                             | 0.00462 | 0.02931                             | 0.00046 | 0.00934                              | 0.00012 | 199                                  | 13 | 187                                 | 2  | 186                                 | 1  |
| KT-05-12 | 369               | 276              | 1.337                               | 0.04942                              | 0.00028 | 0.17646                             | 0.00382 | 0.02591                             | 0.00054 | 0.00790                              | 0.00011 | 168                                  | 11 | 165                                 | 2  | 165                                 | 2  |
| KT-05-13 | 563               | 281              | 2.004                               | 0.05864                              | 0.00046 | 0.54304                             | 0.01918 | 0.06690                             | 0.00150 | 0.02019                              | 0.00032 | 554                                  | 20 | 440                                 | 6  | 417                                 | 5  |
| KT-05-14 | 616               | 238              | 2.588                               | 0.05306                              | 0.00018 | 0.38483                             | 0.00748 | 0.05262                             | 0.00104 | 0.01618                              | 0.00019 | 331                                  | 10 | 331                                 | 3  | 331                                 | 3  |
| KT-05-15 | 321               | 120              | 2.671                               | 0.05369                              | 0.00022 | 0.42073                             | 0.00508 | 0.05685                             | 0.00064 | 0.01817                              | 0.00014 | 358                                  | 6  | 357                                 | 2  | 356                                 | 2  |
| KT-05-16 | 252               | 221              | 1.140                               | 0.05233                              | 0.00021 | 0.34063                             | 0.00608 | 0.04722                             | 0.00082 | 0.01452                              | 0.00013 | 300                                  | 9  | 298                                 | 2  | 297                                 | 3  |

| Sample   | Content (μg/g)    |                  | <sup>232</sup> Th/ <sup>238</sup> U | Isotope ratio                        |         |                                     |         |                                     |         |                                      |         | Ages (Ma)                            |    |                                     |    |                                     |    |
|----------|-------------------|------------------|-------------------------------------|--------------------------------------|---------|-------------------------------------|---------|-------------------------------------|---------|--------------------------------------|---------|--------------------------------------|----|-------------------------------------|----|-------------------------------------|----|
|          | <sup>232</sup> Th | <sup>238</sup> U |                                     | <sup>207</sup> Pb/ <sup>206</sup> Pb | 1σ      | <sup>207</sup> Pb/ <sup>235</sup> U | 1σ      | <sup>206</sup> Pb/ <sup>238</sup> U | 1σ      | <sup>208</sup> Pb/ <sup>232</sup> Th | 1σ      | <sup>207</sup> Pb/ <sup>206</sup> Pb | 1σ | <sup>207</sup> Pb/ <sup>235</sup> U | 1σ | <sup>206</sup> Pb/ <sup>238</sup> U | 1σ |
| KT-05-17 | 188               | 129              | 1.453                               | 0.05544                              | 0.00031 | 0.37242                             | 0.00912 | 0.04866                             | 0.00090 | 0.01673                              | 0.00028 | 430                                  | 13 | 321                                 | 3  | 306                                 | 3  |
| KT-05-18 | 173               | 72               | 2.398                               | 0.05033                              | 0.00040 | 0.22887                             | 0.00390 | 0.03298                             | 0.00022 | 0.01080                              | 0.00008 | 210                                  | 13 | 209                                 | 2  | 209                                 | 1  |
| KT-05-19 | 415               | 29               | 14.271                              | 0.06067                              | 0.00018 | 0.85462                             | 0.00798 | 0.10215                             | 0.00060 | 0.04611                              | 0.00038 | 627                                  | 5  | 627                                 | 2  | 627                                 | 2  |
| KT-05-20 | 326               | 262              | 1.244                               | 0.04943                              | 0.00031 | 0.17705                             | 0.00320 | 0.02598                             | 0.00036 | 0.00773                              | 0.00008 | 168                                  | 10 | 166                                 | 1  | 165                                 | 1  |
| KT-05-21 | 324               | 215              | 1.509                               | 0.04971                              | 0.00029 | 0.18860                             | 0.00446 | 0.02750                             | 0.00052 | 0.00851                              | 0.00010 | 181                                  | 13 | 175                                 | 2  | 175                                 | 2  |
| KT-05-22 | 162               | 61               | 2.670                               | 0.05706                              | 0.00026 | 0.62284                             | 0.01072 | 0.07923                             | 0.00142 | 0.02440                              | 0.00028 | 494                                  | 9  | 492                                 | 3  | 492                                 | 4  |
| KT-05-23 | 449               | 284              | 1.583                               | 0.05249                              | 0.00019 | 0.35198                             | 0.00682 | 0.04864                             | 0.00090 | 0.01529                              | 0.00018 | 307                                  | 10 | 306                                 | 3  | 306                                 | 3  |
| KT-05-24 | 426               | 197              | 2.167                               | 0.05151                              | 0.00021 | 0.29667                             | 0.00386 | 0.04177                             | 0.00044 | 0.01283                              | 0.00011 | 264                                  | 7  | 264                                 | 2  | 264                                 | 1  |
| KT-05-25 | 98                | 74               | 1.322                               | 0.05415                              | 0.00049 | 0.36990                             | 0.00792 | 0.04960                             | 0.00084 | 0.01531                              | 0.00018 | 377                                  | 11 | 320                                 | 3  | 312                                 | 3  |
| KT-05-26 | 219               | 101              | 2.172                               | 0.05284                              | 0.00027 | 0.37231                             | 0.00448 | 0.05110                             | 0.00038 | 0.07328                              | 0.00289 | 322                                  | 7  | 321                                 | 2  | 321                                 | 1  |
| KT-05-27 | 376               | 255              | 1.473                               | 0.05313                              | 0.00020 | 0.38468                             | 0.00380 | 0.05250                             | 0.00036 | 0.01578                              | 0.00009 | 335                                  | 5  | 330                                 | 1  | 330                                 | 1  |
| KT-05-28 | 220               | 167              | 1.315                               | 0.05257                              | 0.00026 | 0.35558                             | 0.00788 | 0.04907                             | 0.00104 | 0.01511                              | 0.00022 | 310                                  | 11 | 309                                 | 3  | 309                                 | 3  |
| KT-05-29 | 112               | 119              | 0.937                               | 0.05320                              | 0.00037 | 0.37894                             | 0.00696 | 0.05165                             | 0.00064 | 0.01582                              | 0.00011 | 338                                  | 11 | 326                                 | 3  | 325                                 | 2  |
| KT-05-30 | 663               | 288              | 2.301                               | 0.05247                              | 0.00019 | 0.34920                             | 0.00460 | 0.04825                             | 0.00046 | 0.01508                              | 0.00010 | 306                                  | 7  | 304                                 | 2  | 304                                 | 1  |
| KT-05-31 | 372               | 508              | 0.733                               | 0.05034                              | 0.00025 | 0.18790                             | 0.00240 | 0.02706                             | 0.00020 | 0.00801                              | 0.00005 | 211                                  | 8  | 175                                 | 1  | 172                                 | 1  |
| KT-05-32 | 281               | 195              | 1.442                               | 0.04920                              | 0.00026 | 0.18215                             | 0.00446 | 0.02685                             | 0.00062 | 0.00871                              | 0.00015 | 158                                  | 13 | 170                                 | 2  | 171                                 | 2  |
| KT-05-33 | 213               | 170              | 1.254                               | 0.05438                              | 0.00029 | 0.45329                             | 0.00552 | 0.06045                             | 0.00036 | 0.01876                              | 0.00010 | 387                                  | 8  | 380                                 | 2  | 378                                 | 1  |
| KT-05-34 | 369               | 355              | 1.040                               | 0.05772                              | 0.00016 | 0.66887                             | 0.00826 | 0.08402                             | 0.00088 | 0.02652                              | 0.00019 | 519                                  | 6  | 520                                 | 3  | 520                                 | 3  |
| KT-05-35 | 229               | 41               | 5.614                               | 0.06559                              | 0.00021 | 1.18490                             | 0.01616 | 0.13098                             | 0.00156 | 0.04226                              | 0.00032 | 793                                  | 6  | 794                                 | 4  | 793                                 | 4  |
| KT-05-36 | 127               | 62               | 2.048                               | 0.05299                              | 0.00036 | 0.37749                             | 0.00656 | 0.05165                             | 0.00054 | 0.01606                              | 0.00012 | 328                                  | 11 | 325                                 | 2  | 325                                 | 2  |
| KT-05-37 | 406               | 246              | 1.651                               | 0.05238                              | 0.00019 | 0.34677                             | 0.00806 | 0.04800                             | 0.00106 | 0.01492                              | 0.00021 | 302                                  | 12 | 302                                 | 3  | 302                                 | 3  |
| KT-05-38 | 228               | 97               | 2.343                               | 0.05732                              | 0.00023 | 0.64503                             | 0.00984 | 0.08159                             | 0.00104 | 0.02529                              | 0.00022 | 504                                  | 8  | 505                                 | 3  | 506                                 | 3  |
| KT-05-39 | 449               | 223              | 2.016                               | 0.05132                              | 0.00019 | 0.28830                             | 0.00462 | 0.04073                             | 0.00054 | 0.01223                              | 0.00009 | 255                                  | 8  | 257                                 | 2  | 257                                 | 2  |
| KT-05-40 | 87                | 90               | 0.970                               | 0.05106                              | 0.00043 | 0.20189                             | 0.00390 | 0.02867                             | 0.00032 | 0.00928                              | 0.00007 | 244                                  | 12 | 187                                 | 2  | 182                                 | 1  |

| Sample   | Content (μg/g)    |                  | <sup>232</sup> Th/ <sup>238</sup> U | Isotope ratio                        |         |                                     |         |                                     |         |                                      |         | Ages (Ma)                            |    |                                     |    |                                     |    |
|----------|-------------------|------------------|-------------------------------------|--------------------------------------|---------|-------------------------------------|---------|-------------------------------------|---------|--------------------------------------|---------|--------------------------------------|----|-------------------------------------|----|-------------------------------------|----|
|          | <sup>232</sup> Th | <sup>238</sup> U |                                     | <sup>207</sup> Pb/ <sup>206</sup> Pb | 1σ      | <sup>207</sup> Pb/ <sup>235</sup> U | 1σ      | <sup>206</sup> Pb/ <sup>238</sup> U | 1σ      | <sup>208</sup> Pb/ <sup>232</sup> Th | 1σ      | <sup>207</sup> Pb/ <sup>206</sup> Pb | 1σ | <sup>207</sup> Pb/ <sup>235</sup> U | 1σ | <sup>206</sup> Pb/ <sup>238</sup> U | 1σ |
| KT-05-41 | 337               | 210              | 1.604                               | 0.05364                              | 0.00023 | 0.39287                             | 0.00414 | 0.05310                             | 0.00036 | 0.01619                              | 0.00010 | 356                                  | 6  | 336                                 | 2  | 334                                 | 1  |
| KT-05-42 | 227               | 112              | 2.022                               | 0.05279                              | 0.00031 | 0.36231                             | 0.00498 | 0.04977                             | 0.00046 | 0.01574                              | 0.00011 | 320                                  | 8  | 314                                 | 2  | 313                                 | 1  |
| KT-05-43 | 552               | 68               | 8.165                               | 0.05537                              | 0.00017 | 0.52329                             | 0.00552 | 0.06853                             | 0.00060 | 0.02141                              | 0.00017 | 427                                  | 5  | 427                                 | 2  | 427                                 | 2  |
| KT-05-44 | 477               | 207              | 2.308                               | 0.05262                              | 0.00020 | 0.30894                             | 0.00298 | 0.04257                             | 0.00030 | 0.01305                              | 0.00008 | 313                                  | 5  | 273                                 | 1  | 269                                 | 1  |
| KT-05-45 | 211               | 150              | 1.407                               | 0.05125                              | 0.00034 | 0.21463                             | 0.00312 | 0.03036                             | 0.00020 | 0.01038                              | 0.00006 | 252                                  | 11 | 197                                 | 1  | 193                                 | 1  |
| KT-05-46 | 327               | 338              | 0.968                               | 0.04942                              | 0.00026 | 0.18122                             | 0.00204 | 0.02659                             | 0.00020 | 0.00818                              | 0.00004 | 168                                  | 7  | 169                                 | 1  | 169                                 | 1  |
| KT-05-47 | 546               | 221              | 2.475                               | 0.04990                              | 0.00073 | 0.18793                             | 0.00518 | 0.02731                             | 0.00028 | 0.00862                              | 0.00004 | 190                                  | 35 | 175                                 | 2  | 174                                 | 1  |
| KT-05-48 | 254               | 115              | 2.205                               | 0.05308                              | 0.00025 | 0.35791                             | 0.00480 | 0.04889                             | 0.00046 | 0.01464                              | 0.00011 | 332                                  | 7  | 311                                 | 2  | 308                                 | 1  |
| KT-05-49 | 263               | 229              | 1.152                               | 0.05225                              | 0.00023 | 0.35368                             | 0.00616 | 0.04908                             | 0.00078 | 0.01548                              | 0.00016 | 297                                  | 9  | 307                                 | 2  | 309                                 | 2  |
| KT-05-50 | 188               | 138              | 1.363                               | 0.05805                              | 0.00023 | 0.67937                             | 0.00814 | 0.08484                             | 0.00074 | 0.02665                              | 0.00019 | 532                                  | 6  | 526                                 | 2  | 525                                 | 2  |
| KT-05-51 | 294               | 140              | 2.108                               | 0.05573                              | 0.00023 | 0.43080                             | 0.00430 | 0.05607                             | 0.00052 | 0.01699                              | 0.00025 | 442                                  | 5  | 364                                 | 2  | 352                                 | 2  |
| KT-05-52 | 123               | 79               | 1.543                               | 0.05108                              | 0.00037 | 0.27418                             | 0.00422 | 0.03892                             | 0.00026 | 0.01168                              | 0.00007 | 245                                  | 11 | 246                                 | 2  | 246                                 | 1  |
| KT-05-53 | 494               | 224              | 2.200                               | 0.05334                              | 0.00020 | 0.37722                             | 0.00468 | 0.05128                             | 0.00058 | 0.01532                              | 0.00020 | 343                                  | 6  | 325                                 | 2  | 322                                 | 2  |
| KT-05-54 | 404               | 416              | 0.971                               | 0.05358                              | 0.00023 | 0.39051                             | 0.00754 | 0.05282                             | 0.00082 | 0.01605                              | 0.00018 | 354                                  | 10 | 335                                 | 3  | 332                                 | 3  |
| KT-05-55 | 151               | 86               | 1.749                               | 0.05192                              | 0.00182 | 0.22146                             | 0.01504 | 0.03094                             | 0.00056 | 0.00972                              | 0.00007 | 282                                  | 82 | 203                                 | 6  | 196                                 | 2  |
| KT-05-56 | 291               | 446              | 0.652                               | 0.05136                              | 0.00043 | 0.18571                             | 0.00328 | 0.02621                             | 0.00018 | 0.00801                              | 0.00004 | 257                                  | 14 | 173                                 | 1  | 167                                 | 1  |
| KT-05-57 | 114               | 82               | 1.398                               | 0.05298                              | 0.00037 | 0.34484                             | 0.00548 | 0.04720                             | 0.00044 | 0.01550                              | 0.00009 | 328                                  | 10 | 301                                 | 2  | 297                                 | 1  |
| KT-05-58 | 286               | 165              | 1.735                               | 0.05027                              | 0.00028 | 0.18639                             | 0.00258 | 0.02689                             | 0.00028 | 0.00827                              | 0.00006 | 207                                  | 8  | 174                                 | 1  | 171                                 | 1  |
| KT-05-59 | 371               | 347              | 1.069                               | 0.05486                              | 0.00025 | 0.49785                             | 0.01274 | 0.06576                             | 0.00148 | 0.02095                              | 0.00038 | 406                                  | 13 | 410                                 | 4  | 411                                 | 4  |
| KT-05-60 | 558               | 229              | 2.440                               | 0.05005                              | 0.00065 | 0.20419                             | 0.00494 | 0.02959                             | 0.00028 | 0.00934                              | 0.00004 | 197                                  | 31 | 189                                 | 2  | 188                                 | 1  |
| KT-05-61 | 389               | 227              | 1.712                               | 0.04921                              | 0.00027 | 0.18454                             | 0.00260 | 0.02719                             | 0.00026 | 0.00865                              | 0.00006 | 158                                  | 8  | 172                                 | 1  | 173                                 | 1  |
| KT-05-62 | 116               | 66               | 1.767                               | 0.05294                              | 0.00032 | 0.37583                             | 0.00528 | 0.05147                             | 0.00040 | 0.01613                              | 0.00010 | 326                                  | 9  | 324                                 | 2  | 324                                 | 1  |
| KT-05-63 | 117               | 78               | 1.496                               | 0.05234                              | 0.00038 | 0.34500                             | 0.00570 | 0.04781                             | 0.00054 | 0.01511                              | 0.00012 | 300                                  | 9  | 301                                 | 2  | 301                                 | 2  |
| KT-05-64 | 218               | 153              | 1.424                               | 0.05009                              | 0.00034 | 0.19525                             | 0.00370 | 0.02826                             | 0.00036 | 0.00908                              | 0.00009 | 199                                  | 11 | 181                                 | 2  | 180                                 | 1  |

| Sample   | Content (μg/g)    |                  | <sup>232</sup> Th/ <sup>238</sup> U | Isotope ratio                        |         |                                     |         |                                     |         |                                      |         | Ages (Ma)                            |    |                                     |    |                                     |    |
|----------|-------------------|------------------|-------------------------------------|--------------------------------------|---------|-------------------------------------|---------|-------------------------------------|---------|--------------------------------------|---------|--------------------------------------|----|-------------------------------------|----|-------------------------------------|----|
|          | <sup>232</sup> Th | <sup>238</sup> U |                                     | <sup>207</sup> Pb/ <sup>206</sup> Pb | 1σ      | <sup>207</sup> Pb/ <sup>235</sup> U | 1σ      | <sup>206</sup> Pb/ <sup>238</sup> U | 1σ      | <sup>208</sup> Pb/ <sup>232</sup> Th | 1σ      | <sup>207</sup> Pb/ <sup>206</sup> Pb | 1σ | <sup>207</sup> Pb/ <sup>235</sup> U | 1σ | <sup>206</sup> Pb/ <sup>238</sup> U | 1σ |
| KT-05-65 | 227               | 312              | 0.728                               | 0.05245                              | 0.00027 | 0.34824                             | 0.00578 | 0.04815                             | 0.00068 | 0.01440                              | 0.00012 | 305                                  | 8  | 303                                 | 2  | 303                                 | 2  |
| KT-05-66 | 184               | 169              | 1.092                               | 0.04987                              | 0.00031 | 0.18055                             | 0.00292 | 0.02625                             | 0.00028 | 0.00806                              | 0.00006 | 189                                  | 9  | 169                                 | 1  | 167                                 | 1  |
| KT-05-67 | 441               | 246              | 1.794                               | 0.05540                              | 0.00019 | 0.52714                             | 0.00776 | 0.06899                             | 0.00090 | 0.02158                              | 0.00018 | 428                                  | 7  | 430                                 | 3  | 430                                 | 3  |
| KT-05-68 | 150               | 86               | 1.751                               | 0.05303                              | 0.00036 | 0.38132                             | 0.00502 | 0.05217                             | 0.00044 | 0.01668                              | 0.00012 | 330                                  | 8  | 328                                 | 2  | 328                                 | 1  |
| KT-05-69 | 246               | 175              | 1.408                               | 0.05286                              | 0.00028 | 0.37926                             | 0.00614 | 0.05203                             | 0.00068 | 0.01635                              | 0.00015 | 323                                  | 8  | 326                                 | 2  | 327                                 | 2  |
| KT-05-70 | 148               | 172              | 0.860                               | 0.04987                              | 0.00042 | 0.18626                             | 0.00320 | 0.02710                             | 0.00024 | 0.00845                              | 0.00005 | 189                                  | 12 | 173                                 | 1  | 172                                 | 1  |
| KT-05-71 | 108               | 80               | 1.348                               | 0.05381                              | 0.00049 | 0.31367                             | 0.00824 | 0.04226                             | 0.00080 | 0.01261                              | 0.00016 | 363                                  | 14 | 277                                 | 3  | 267                                 | 2  |
| KT-05-72 | 145               | 119              | 1.221                               | 0.04952                              | 0.00039 | 0.18751                             | 0.00380 | 0.02745                             | 0.00032 | 0.00873                              | 0.00008 | 173                                  | 13 | 175                                 | 2  | 175                                 | 1  |
| KT-05-73 | 352               | 145              | 2.430                               | 0.05674                              | 0.00022 | 0.60929                             | 0.00792 | 0.07786                             | 0.00084 | 0.02443                              | 0.00019 | 482                                  | 6  | 483                                 | 3  | 483                                 | 3  |
| KT-05-74 | 321               | 208              | 1.544                               | 0.04953                              | 0.00028 | 0.18906                             | 0.00242 | 0.02768                             | 0.00018 | 0.00869                              | 0.00005 | 173                                  | 9  | 176                                 | 1  | 176                                 | 1  |
| KT-05-75 | 377               | 527              | 0.715                               | 0.05259                              | 0.00063 | 0.17902                             | 0.00376 | 0.02476                             | 0.00042 | 0.00743                              | 0.00010 | 311                                  | 11 | 167                                 | 2  | 158                                 | 1  |
| KT-05-76 | 446               | 184              | 2.421                               | 0.05334                              | 0.00017 | 0.39215                             | 0.00390 | 0.05330                             | 0.00038 | 0.01692                              | 0.00009 | 343                                  | 5  | 336                                 | 1  | 335                                 | 1  |
| KT-05-77 | 531               | 361              | 1.470                               | 0.05063                              | 0.00023 | 0.19734                             | 0.00210 | 0.02826                             | 0.00020 | 0.00908                              | 0.00005 | 224                                  | 6  | 183                                 | 1  | 180                                 | 1  |
| KT-05-78 | 166               | 196              | 0.849                               | 0.04996                              | 0.00034 | 0.18673                             | 0.00320 | 0.02710                             | 0.00028 | 0.00867                              | 0.00005 | 193                                  | 11 | 174                                 | 1  | 172                                 | 1  |
| KT-05-79 | 451               | 601              | 0.751                               | 0.05036                              | 0.00022 | 0.18623                             | 0.00200 | 0.02681                             | 0.00018 | 0.00826                              | 0.00006 | 212                                  | 6  | 173                                 | 1  | 171                                 | 1  |
| KT-05-80 | 200               | 160              | 1.249                               | 0.04937                              | 0.00037 | 0.18669                             | 0.00412 | 0.02740                             | 0.00038 | 0.00885                              | 0.00009 | 166                                  | 13 | 174                                 | 2  | 174                                 | 1  |
| KT-05-81 | 120               | 75               | 1.601                               | 0.05348                              | 0.00031 | 0.40911                             | 0.00614 | 0.05550                             | 0.00072 | 0.01671                              | 0.00012 | 349                                  | 8  | 348                                 | 2  | 348                                 | 2  |
| KT-05-82 | 340               | 215              | 1.584                               | 0.05308                              | 0.00026 | 0.38295                             | 0.00758 | 0.05231                             | 0.00088 | 0.01665                              | 0.00021 | 332                                  | 10 | 329                                 | 3  | 329                                 | 3  |
| KT-05-83 | 99                | 72               | 1.379                               | 0.08390                              | 0.00026 | 2.56600                             | 0.04180 | 0.22170                             | 0.00312 | 0.07211                              | 0.00042 | 1290                                 | 7  | 1291                                | 6  | 1291                                | 8  |
| KT-05-84 | 194               | 90               | 2.156                               | 0.05317                              | 0.00071 | 0.20482                             | 0.00810 | 0.02783                             | 0.00048 | 0.00969                              | 0.00016 | 336                                  | 29 | 189                                 | 3  | 177                                 | 1  |
| KT-05-85 | 148               | 86               | 1.713                               | 0.05344                              | 0.00033 | 0.40238                             | 0.00592 | 0.05462                             | 0.00058 | 0.01769                              | 0.00013 | 347                                  | 8  | 343                                 | 2  | 343                                 | 2  |
| KT-05-86 | 179               | 137              | 1.312                               | 0.04970                              | 0.00037 | 0.19260                             | 0.00358 | 0.02811                             | 0.00036 | 0.00892                              | 0.00007 | 181                                  | 11 | 179                                 | 2  | 179                                 | 1  |
| KT-05-87 | 393               | 378              | 1.040                               | 0.05930                              | 0.00017 | 0.72166                             | 0.00892 | 0.08824                             | 0.00100 | 0.02758                              | 0.00029 | 578                                  | 6  | 552                                 | 3  | 545                                 | 3  |
| KT-05-88 | 541               | 495              | 1.093                               | 0.04961                              | 0.00022 | 0.19211                             | 0.00338 | 0.02807                             | 0.00040 | 0.00869                              | 0.00006 | 177                                  | 9  | 178                                 | 1  | 178                                 | 1  |



| Sample    | Content (μg/g)    |                  | <sup>232</sup> Th/ <sup>238</sup> U | Isotope ratio                        |         |                                     |         |                                     |         |                                      |         | Ages (Ma)                            |     |                                     |    |                                     |    |
|-----------|-------------------|------------------|-------------------------------------|--------------------------------------|---------|-------------------------------------|---------|-------------------------------------|---------|--------------------------------------|---------|--------------------------------------|-----|-------------------------------------|----|-------------------------------------|----|
|           | <sup>232</sup> Th | <sup>238</sup> U |                                     | <sup>207</sup> Pb/ <sup>206</sup> Pb | 1σ      | <sup>207</sup> Pb/ <sup>235</sup> U | 1σ      | <sup>206</sup> Pb/ <sup>238</sup> U | 1σ      | <sup>208</sup> Pb/ <sup>232</sup> Th | 1σ      | <sup>207</sup> Pb/ <sup>206</sup> Pb | 1σ  | <sup>207</sup> Pb/ <sup>235</sup> U | 1σ | <sup>206</sup> Pb/ <sup>238</sup> U | 1σ |
| KT-05-89  | 326               | 235              | 1.385                               | 0.05250                              | 0.00022 | 0.34952                             | 0.00414 | 0.04826                             | 0.00038 | 0.01557                              | 0.00008 | 307                                  | 7   | 304                                 | 2  | 304                                 | 1  |
| KT-05-90  | 178               | 99               | 1.794                               | 0.05059                              | 0.00032 | 0.19456                             | 0.00286 | 0.02789                             | 0.00022 | 0.00951                              | 0.00007 | 222                                  | 10  | 181                                 | 1  | 177                                 | 1  |
| KT-05-91  | 514               | 355              | 1.447                               | 0.05015                              | 0.00025 | 0.19119                             | 0.00400 | 0.02762                             | 0.00042 | 0.00905                              | 0.00011 | 202                                  | 12  | 178                                 | 2  | 176                                 | 1  |
| KT-05-92  | 496               | 372              | 1.331                               | 0.05315                              | 0.00021 | 0.38805                             | 0.00670 | 0.05293                             | 0.00078 | 0.01699                              | 0.00017 | 335                                  | 9   | 333                                 | 2  | 332                                 | 2  |
| KT-05-93  | 148               | 107              | 1.377                               | 0.05366                              | 0.00224 | 0.26082                             | 0.02702 | 0.03499                             | 0.00036 | 0.01160                              | 0.00027 | 357                                  | 109 | 235                                 | 11 | 222                                 | 1  |
| KT-05-94  | 61                | 23               | 2.676                               | 0.05306                              | 0.00049 | 0.36165                             | 0.00802 | 0.04941                             | 0.00056 | 0.01679                              | 0.00014 | 331                                  | 15  | 313                                 | 3  | 311                                 | 2  |
| KT-05-95  | 66                | 46               | 1.415                               | 0.05099                              | 0.00100 | 0.19098                             | 0.00730 | 0.02717                             | 0.00024 | 0.00855                              | 0.00003 | 240                                  | 46  | 177                                 | 3  | 173                                 | 1  |
| KT-05-96  | 325               | 281              | 1.158                               | 0.05254                              | 0.00021 | 0.36926                             | 0.00388 | 0.05098                             | 0.00046 | 0.01682                              | 0.00011 | 309                                  | 5   | 319                                 | 1  | 321                                 | 1  |
| KT-05-97  | 94                | 53               | 1.773                               | 0.05269                              | 0.00044 | 0.35172                             | 0.00698 | 0.04841                             | 0.00058 | 0.01550                              | 0.00013 | 316                                  | 12  | 306                                 | 3  | 305                                 | 2  |
| KT-05-98  | 224               | 74               | 3.016                               | 0.05542                              | 0.00020 | 0.53604                             | 0.01068 | 0.07011                             | 0.00124 | 0.02184                              | 0.00030 | 429                                  | 10  | 436                                 | 4  | 437                                 | 4  |
| KT-05-99  | 246               | 163              | 1.508                               | 0.05923                              | 0.00032 | 0.69340                             | 0.01074 | 0.08486                             | 0.00078 | 0.02549                              | 0.00020 | 576                                  | 9   | 535                                 | 3  | 525                                 | 2  |
| KT-05-100 | 133               | 110              | 1.206                               | 0.05014                              | 0.00045 | 0.20134                             | 0.00352 | 0.02914                             | 0.00030 | 0.00930                              | 0.00007 | 202                                  | 11  | 186                                 | 1  | 185                                 | 1  |
| KT-06     |                   |                  |                                     |                                      |         |                                     |         |                                     |         |                                      |         |                                      |     |                                     |    |                                     |    |
| KT-06-1   | 158               | 70               | 2.249                               | 0.05395                              | 0.00041 | 0.49262                             | 0.01238 | 0.06624                             | 0.00120 | 0.01925                              | 0.00016 | 369                                  | 14  | 407                                 | 4  | 413                                 | 4  |
| KT-06-2   | 157               | 92               | 1.699                               | 0.05410                              | 0.00042 | 0.47137                             | 0.00916 | 0.06322                             | 0.00066 | 0.01934                              | 0.00014 | 375                                  | 13  | 392                                 | 3  | 395                                 | 2  |
| KT-06-3   | 219               | 79               | 2.786                               | 0.05414                              | 0.00040 | 0.47404                             | 0.00892 | 0.06352                             | 0.00068 | 0.01916                              | 0.00015 | 377                                  | 12  | 394                                 | 3  | 397                                 | 2  |
| KT-06-4   | 156               | 130              | 1.193                               | 0.05480                              | 0.00044 | 0.51775                             | 0.01108 | 0.06854                             | 0.00092 | 0.02101                              | 0.00027 | 404                                  | 13  | 424                                 | 4  | 427                                 | 3  |
| KT-06-5   | 122               | 84               | 1.441                               | 0.05294                              | 0.00051 | 0.34539                             | 0.00930 | 0.04735                             | 0.00094 | 0.01534                              | 0.00023 | 326                                  | 15  | 301                                 | 4  | 298                                 | 3  |
| KT-06-6   | 151               | 99               | 1.531                               | 0.05214                              | 0.00050 | 0.32508                             | 0.00744 | 0.04523                             | 0.00056 | 0.01406                              | 0.00014 | 292                                  | 15  | 286                                 | 3  | 285                                 | 2  |
| KT-06-7   | 99                | 67               | 1.470                               | 0.05468                              | 0.00052 | 0.50639                             | 0.01448 | 0.06720                             | 0.00148 | 0.02007                              | 0.00023 | 399                                  | 15  | 416                                 | 5  | 419                                 | 4  |
| KT-06-8   | 300               | 144              | 2.093                               | 0.05409                              | 0.00039 | 0.45272                             | 0.00868 | 0.06072                             | 0.00076 | 0.01849                              | 0.00018 | 375                                  | 11  | 379                                 | 3  | 380                                 | 2  |
| KT-06-9   | 218               | 47               | 4.678                               | 0.05485                              | 0.00035 | 0.50119                             | 0.01514 | 0.06628                             | 0.00182 | 0.02015                              | 0.00027 | 406                                  | 15  | 413                                 | 5  | 414                                 | 6  |
| KT-06-10  | 695               | 259              | 2.690                               | 0.05264                              | 0.00025 | 0.35300                             | 0.00462 | 0.04864                             | 0.00042 | 0.01519                              | 0.00009 | 313                                  | 8   | 307                                 | 2  | 306                                 | 1  |
| KT-06-11  | 286               | 176              | 1.623                               | 0.05466                              | 0.00022 | 0.48034                             | 0.00740 | 0.06372                             | 0.00078 | 0.01995                              | 0.00015 | 399                                  | 8   | 398                                 | 3  | 398                                 | 2  |

| Sample   | Content (μg/g)    |                  | <sup>232</sup> Th/ <sup>238</sup> U | Isotope ratio                        |         |                                     |         |                                     |         |                                      |         | Ages (Ma)                            |    |                                     |    |                                     |    |
|----------|-------------------|------------------|-------------------------------------|--------------------------------------|---------|-------------------------------------|---------|-------------------------------------|---------|--------------------------------------|---------|--------------------------------------|----|-------------------------------------|----|-------------------------------------|----|
|          | <sup>232</sup> Th | <sup>238</sup> U |                                     | <sup>207</sup> Pb/ <sup>206</sup> Pb | 1σ      | <sup>207</sup> Pb/ <sup>235</sup> U | 1σ      | <sup>206</sup> Pb/ <sup>238</sup> U | 1σ      | <sup>208</sup> Pb/ <sup>232</sup> Th | 1σ      | <sup>207</sup> Pb/ <sup>206</sup> Pb | 1σ | <sup>207</sup> Pb/ <sup>235</sup> U | 1σ | <sup>206</sup> Pb/ <sup>238</sup> U | 1σ |
| KT-06-12 | 305               | 112              | 2.716                               | 0.05507                              | 0.00022 | 0.56223                             | 0.03712 | 0.07405                             | 0.00486 | 0.02159                              | 0.00057 | 415                                  | 34 | 453                                 | 12 | 461                                 | 15 |
| KT-06-13 | 276               | 43               | 6.355                               | 0.05536                              | 0.00021 | 0.52401                             | 0.01174 | 0.06864                             | 0.00144 | 0.02136                              | 0.00030 | 427                                  | 11 | 428                                 | 4  | 428                                 | 4  |
| KT-06-14 | 355               | 30               | 11.764                              | 0.05475                              | 0.00017 | 0.49201                             | 0.01032 | 0.06517                             | 0.00132 | 0.02033                              | 0.00025 | 402                                  | 11 | 406                                 | 4  | 407                                 | 4  |
| KT-06-15 | 838               | 65               | 12.903                              | 0.05756                              | 0.00067 | 0.60146                             | 0.01068 | 0.07579                             | 0.00114 | 0.02352                              | 0.00017 | 513                                  | 26 | 478                                 | 3  | 471                                 | 3  |
| KT-06-16 | 143               | 128              | 1.119                               | 0.05250                              | 0.00030 | 0.31340                             | 0.00564 | 0.04328                             | 0.00052 | 0.01336                              | 0.00011 | 307                                  | 10 | 277                                 | 2  | 273                                 | 2  |
| KT-06-17 | 51                | 21               | 2.398                               | 0.05496                              | 0.00113 | 0.50970                             | 0.01946 | 0.06726                             | 0.00102 | 0.02099                              | 0.00014 | 411                                  | 47 | 418                                 | 7  | 420                                 | 3  |
| KT-06-18 | 127               | 59               | 2.159                               | 0.05314                              | 0.00027 | 0.36312                             | 0.00700 | 0.04955                             | 0.00078 | 0.01562                              | 0.00015 | 335                                  | 10 | 315                                 | 3  | 312                                 | 2  |
| KT-06-19 | 175               | 67               | 2.595                               | 0.05294                              | 0.00028 | 0.38078                             | 0.00976 | 0.05222                             | 0.00136 | 0.01660                              | 0.00024 | 326                                  | 13 | 328                                 | 4  | 328                                 | 4  |
| KT-06-20 | 158               | 91               | 1.734                               | 0.06241                              | 0.00199 | 0.45300                             | 0.04050 | 0.05182                             | 0.00218 | 0.02150                              | 0.00094 | 688                                  | 60 | 379                                 | 14 | 326                                 | 7  |
| KT-06-21 | 372               | 45               | 8.189                               | 0.05464                              | 0.00016 | 0.48117                             | 0.01586 | 0.06386                             | 0.00208 | 0.01898                              | 0.00022 | 398                                  | 17 | 399                                 | 5  | 399                                 | 6  |
| KT-06-22 | 267               | 199              | 1.344                               | 0.05160                              | 0.00045 | 0.26127                             | 0.01178 | 0.03658                             | 0.00126 | 0.01170                              | 0.00023 | 268                                  | 24 | 236                                 | 5  | 232                                 | 4  |
| KT-06-23 | 69                | 33               | 2.059                               | 0.05292                              | 0.00041 | 0.36609                             | 0.00630 | 0.05017                             | 0.00040 | 0.01629                              | 0.00012 | 325                                  | 12 | 317                                 | 2  | 316                                 | 1  |
| KT-06-24 | 204               | 158              | 1.293                               | 0.05759                              | 0.00024 | 0.64839                             | 0.01076 | 0.08166                             | 0.00126 | 0.02547                              | 0.00024 | 514                                  | 8  | 507                                 | 3  | 506                                 | 4  |
| KT-06-25 | 521               | 692              | 0.753                               | 0.05192                              | 0.00017 | 0.31585                             | 0.00394 | 0.04411                             | 0.00046 | 0.01378                              | 0.00010 | 282                                  | 6  | 279                                 | 2  | 278                                 | 1  |
| KT-06-26 | 132               | 53               | 2.518                               | 0.05520                              | 0.00028 | 0.51679                             | 0.00874 | 0.06791                             | 0.00102 | 0.02071                              | 0.00016 | 420                                  | 8  | 423                                 | 3  | 424                                 | 3  |
| KT-06-27 | 52                | 23               | 2.231                               | 0.05297                              | 0.00043 | 0.35139                             | 0.00654 | 0.04810                             | 0.00046 | 0.01667                              | 0.00015 | 328                                  | 13 | 306                                 | 2  | 303                                 | 1  |
| KT-06-28 | 179               | 22               | 8.156                               | 0.05461                              | 0.00021 | 0.48335                             | 0.00894 | 0.06417                             | 0.00104 | 0.02072                              | 0.00019 | 396                                  | 9  | 400                                 | 3  | 401                                 | 3  |
| KT-06-29 | 19                | 18               | 1.038                               | 0.05504                              | 0.00096 | 0.32529                             | 0.01380 | 0.04282                             | 0.00094 | 0.01338                              | 0.00019 | 414                                  | 28 | 286                                 | 5  | 270                                 | 3  |
| KT-06-30 | 155               | 100              | 1.555                               | 0.05246                              | 0.00026 | 0.34368                             | 0.00610 | 0.04750                             | 0.00072 | 0.01532                              | 0.00012 | 306                                  | 9  | 300                                 | 2  | 299                                 | 2  |
| KT-06-31 | 69                | 33               | 2.118                               | 0.05222                              | 0.00046 | 0.32310                             | 0.00628 | 0.04488                             | 0.00046 | 0.01408                              | 0.00011 | 295                                  | 13 | 284                                 | 2  | 283                                 | 1  |
| KT-06-32 | 95                | 67               | 1.410                               | 0.05461                              | 0.00028 | 0.47473                             | 0.00736 | 0.06304                             | 0.00078 | 0.01986                              | 0.00015 | 396                                  | 8  | 394                                 | 3  | 394                                 | 2  |
| KT-06-33 | 119               | 75               | 1.585                               | 0.05494                              | 0.00020 | 0.49709                             | 0.00578 | 0.06561                             | 0.00062 | 0.02065                              | 0.00018 | 410                                  | 6  | 410                                 | 2  | 410                                 | 2  |
| KT-06-34 | 35                | 10               | 3.323                               | 0.05622                              | 0.00050 | 0.56073                             | 0.01054 | 0.07239                             | 0.00096 | 0.02464                              | 0.00030 | 461                                  | 10 | 452                                 | 3  | 451                                 | 3  |
| KT-06-35 | 113               | 10               | 11.115                              | 0.05944                              | 0.00025 | 0.77293                             | 0.01010 | 0.09431                             | 0.00104 | 0.03440                              | 0.00041 | 583                                  | 6  | 581                                 | 3  | 581                                 | 3  |

| Sample   | Content (μg/g)    |                  | <sup>232</sup> Th/ <sup>238</sup> U | Isotope ratio                        |         |                                     |         |                                     |         |                                      |         | Ages (Ma)                            |    |                                     |    |                                     |    |
|----------|-------------------|------------------|-------------------------------------|--------------------------------------|---------|-------------------------------------|---------|-------------------------------------|---------|--------------------------------------|---------|--------------------------------------|----|-------------------------------------|----|-------------------------------------|----|
|          | <sup>232</sup> Th | <sup>238</sup> U |                                     | <sup>207</sup> Pb/ <sup>206</sup> Pb | 1σ      | <sup>207</sup> Pb/ <sup>235</sup> U | 1σ      | <sup>206</sup> Pb/ <sup>238</sup> U | 1σ      | <sup>208</sup> Pb/ <sup>232</sup> Th | 1σ      | <sup>207</sup> Pb/ <sup>206</sup> Pb | 1σ | <sup>207</sup> Pb/ <sup>235</sup> U | 1σ | <sup>206</sup> Pb/ <sup>238</sup> U | 1σ |
| KT-06-36 | 288               | 123              | 2.335                               | 0.05572                              | 0.00020 | 0.52734                             | 0.00860 | 0.06861                             | 0.00092 | 0.02252                              | 0.00030 | 441                                  | 8  | 430                                 | 3  | 428                                 | 3  |
| KT-06-37 | 495               | 244              | 2.027                               | 0.05295                              | 0.00018 | 0.34379                             | 0.00354 | 0.04709                             | 0.00042 | 0.01509                              | 0.00008 | 327                                  | 5  | 300                                 | 1  | 297                                 | 1  |
| KT-06-38 | 279               | 79               | 3.515                               | 0.05283                              | 0.00020 | 0.36429                             | 0.00780 | 0.04999                             | 0.00096 | 0.01586                              | 0.00018 | 321                                  | 11 | 315                                 | 3  | 314                                 | 3  |
| KT-06-39 | 278               | 302              | 0.919                               | 0.05289                              | 0.00022 | 0.32717                             | 0.00620 | 0.04485                             | 0.00074 | 0.01410                              | 0.00016 | 324                                  | 10 | 287                                 | 2  | 283                                 | 2  |
| KT-06-40 | 347               | 152              | 2.279                               | 0.05272                              | 0.00018 | 0.34301                             | 0.00410 | 0.04718                             | 0.00048 | 0.01500                              | 0.00010 | 317                                  | 6  | 299                                 | 2  | 297                                 | 2  |
| KT-06-41 | 207               | 162              | 1.276                               | 0.05320                              | 0.00023 | 0.35225                             | 0.00384 | 0.04801                             | 0.00036 | 0.01531                              | 0.00008 | 338                                  | 6  | 306                                 | 1  | 302                                 | 1  |
| KT-06-42 | 317               | 76               | 4.181                               | 0.05181                              | 0.00021 | 0.31663                             | 0.00608 | 0.04433                             | 0.00082 | 0.01388                              | 0.00018 | 277                                  | 10 | 279                                 | 2  | 280                                 | 3  |
| KT-06-43 | 173               | 116              | 1.497                               | 0.05276                              | 0.00027 | 0.33861                             | 0.00496 | 0.04653                             | 0.00048 | 0.01437                              | 0.00010 | 319                                  | 8  | 296                                 | 2  | 293                                 | 1  |
| KT-06-44 | 141               | 81               | 1.746                               | 0.05255                              | 0.00025 | 0.33006                             | 0.00574 | 0.04554                             | 0.00062 | 0.01392                              | 0.00012 | 309                                  | 9  | 290                                 | 2  | 287                                 | 2  |
| KT-06-45 | 332               | 143              | 2.313                               | 0.05478                              | 0.00017 | 0.48816                             | 0.01076 | 0.06462                             | 0.00136 | 0.01989                              | 0.00032 | 403                                  | 11 | 404                                 | 4  | 404                                 | 4  |
| KT-06-46 | 24                | 6                | 3.760                               | 0.05291                              | 0.00073 | 0.33358                             | 0.00900 | 0.04583                             | 0.00074 | 0.01596                              | 0.00059 | 325                                  | 17 | 292                                 | 3  | 289                                 | 2  |
| KT-06-47 | 76                | 50               | 1.506                               | 0.05530                              | 0.00031 | 0.50092                             | 0.00730 | 0.06570                             | 0.00064 | 0.02031                              | 0.00017 | 424                                  | 8  | 412                                 | 2  | 410                                 | 2  |
| KT-06-48 | 324               | 107              | 3.036                               | 0.05290                              | 0.00020 | 0.36333                             | 0.00586 | 0.04981                             | 0.00070 | 0.01493                              | 0.00015 | 324                                  | 8  | 315                                 | 2  | 313                                 | 2  |
| KT-06-49 | 129               | 67               | 1.919                               | 0.05570                              | 0.00027 | 0.56410                             | 0.00912 | 0.07343                             | 0.00088 | 0.02335                              | 0.00026 | 440                                  | 9  | 454                                 | 3  | 457                                 | 3  |
| KT-06-50 | 210               | 117              | 1.787                               | 0.05499                              | 0.00029 | 0.52850                             | 0.01628 | 0.06963                             | 0.00184 | 0.02083                              | 0.00031 | 412                                  | 15 | 431                                 | 5  | 434                                 | 6  |
| KT-06-51 | 102               | 91               | 1.111                               | 0.05274                              | 0.00035 | 0.34248                             | 0.00592 | 0.04708                             | 0.00050 | 0.01441                              | 0.00011 | 318                                  | 11 | 299                                 | 2  | 297                                 | 2  |
| KT-06-52 | 136               | 8                | 16.880                              | 0.05235                              | 0.00030 | 0.35110                             | 0.00618 | 0.04863                             | 0.00060 | 0.01594                              | 0.00043 | 301                                  | 10 | 306                                 | 2  | 306                                 | 2  |
| KT-06-53 | 426               | 98               | 4.340                               | 0.05193                              | 0.00020 | 0.29378                             | 0.00386 | 0.04102                             | 0.00042 | 0.01263                              | 0.00012 | 282                                  | 7  | 262                                 | 2  | 259                                 | 1  |
| KT-06-54 | 29                | 23               | 1.260                               | 0.05364                              | 0.00073 | 0.36247                             | 0.01238 | 0.04899                             | 0.00096 | 0.01506                              | 0.00020 | 356                                  | 22 | 314                                 | 5  | 308                                 | 3  |
| KT-06-55 | 139               | 50               | 2.775                               | 0.05480                              | 0.00026 | 0.49406                             | 0.00688 | 0.06541                             | 0.00090 | 0.01988                              | 0.00020 | 404                                  | 7  | 408                                 | 2  | 408                                 | 3  |
| KT-06-56 | 165               | 63               | 2.614                               | 0.05260                              | 0.00023 | 0.36748                             | 0.00732 | 0.05065                             | 0.00092 | 0.01630                              | 0.00021 | 312                                  | 10 | 318                                 | 3  | 319                                 | 3  |
| KT-06-57 | 181               | 100              | 1.808                               | 0.05306                              | 0.00023 | 0.37038                             | 0.00408 | 0.05062                             | 0.00040 | 0.01569                              | 0.00011 | 331                                  | 6  | 320                                 | 2  | 318                                 | 1  |
| KT-06-58 | 72                | 27               | 2.720                               | 0.05570                              | 0.00036 | 0.53545                             | 0.00824 | 0.06972                             | 0.00072 | 0.02150                              | 0.00022 | 441                                  | 9  | 435                                 | 3  | 434                                 | 2  |
| KT-06-59 | 128               | 126              | 1.016                               | 0.05306                              | 0.00034 | 0.35953                             | 0.00568 | 0.04913                             | 0.00040 | 0.01504                              | 0.00010 | 331                                  | 11 | 312                                 | 2  | 309                                 | 1  |

| Sample   | Content (μg/g)    |                  | <sup>232</sup> Th/ <sup>238</sup> U | Isotope ratio                        |         |                                     |         |                                     |         |                                      |         | Ages (Ma)                            |    |                                     |    |                                     |    |
|----------|-------------------|------------------|-------------------------------------|--------------------------------------|---------|-------------------------------------|---------|-------------------------------------|---------|--------------------------------------|---------|--------------------------------------|----|-------------------------------------|----|-------------------------------------|----|
|          | <sup>232</sup> Th | <sup>238</sup> U |                                     | <sup>207</sup> Pb/ <sup>206</sup> Pb | 1σ      | <sup>207</sup> Pb/ <sup>235</sup> U | 1σ      | <sup>206</sup> Pb/ <sup>238</sup> U | 1σ      | <sup>208</sup> Pb/ <sup>232</sup> Th | 1σ      | <sup>207</sup> Pb/ <sup>206</sup> Pb | 1σ | <sup>207</sup> Pb/ <sup>235</sup> U | 1σ | <sup>206</sup> Pb/ <sup>238</sup> U | 1σ |
| KT-06-60 | 98                | 39               | 2.524                               | 0.05275                              | 0.00036 | 0.33838                             | 0.00538 | 0.04652                             | 0.00044 | 0.01444                              | 0.00012 | 318                                  | 10 | 296                                 | 2  | 293                                 | 1  |
| KT-06-61 | 342               | 238              | 1.437                               | 0.05587                              | 0.00018 | 0.55067                             | 0.00782 | 0.07146                             | 0.00090 | 0.02179                              | 0.00020 | 447                                  | 7  | 445                                 | 3  | 445                                 | 3  |
| KT-06-62 | 154               | 60               | 2.567                               | 0.05578                              | 0.00024 | 0.52284                             | 0.00582 | 0.06797                             | 0.00052 | 0.02107                              | 0.00016 | 443                                  | 6  | 427                                 | 2  | 424                                 | 2  |
| KT-06-63 | 77                | 60               | 1.288                               | 0.05404                              | 0.00037 | 0.39877                             | 0.00590 | 0.05351                             | 0.00036 | 0.01660                              | 0.00013 | 373                                  | 11 | 341                                 | 2  | 336                                 | 1  |
| KT-06-64 | 248               | 301              | 0.824                               | 0.05209                              | 0.00021 | 0.32588                             | 0.00428 | 0.04538                             | 0.00056 | 0.01392                              | 0.00012 | 289                                  | 7  | 286                                 | 2  | 286                                 | 2  |
| KT-06-65 | 9                 | 8                | 1.198                               | 0.05483                              | 0.00120 | 0.37744                             | 0.01794 | 0.04996                             | 0.00100 | 0.01619                              | 0.00046 | 405                                  | 35 | 325                                 | 7  | 314                                 | 3  |
| KT-06-66 | 236               | 136              | 1.731                               | 0.05726                              | 0.00021 | 0.57697                             | 0.00576 | 0.07306                             | 0.00050 | 0.02180                              | 0.00017 | 502                                  | 5  | 463                                 | 2  | 455                                 | 1  |
| KT-06-67 | 114               | 70               | 1.634                               | 0.05596                              | 0.00029 | 0.53942                             | 0.00704 | 0.06989                             | 0.00056 | 0.02160                              | 0.00019 | 451                                  | 8  | 438                                 | 2  | 435                                 | 2  |
| KT-06-68 | 364               | 135              | 2.692                               | 0.05361                              | 0.00069 | 0.38195                             | 0.00918 | 0.05167                             | 0.00048 | 0.01617                              | 0.00007 | 355                                  | 30 | 328                                 | 3  | 325                                 | 1  |
| KT-06-69 | 256               | 65               | 3.949                               | 0.05479                              | 0.00019 | 0.48782                             | 0.00690 | 0.06455                             | 0.00080 | 0.01955                              | 0.00019 | 404                                  | 7  | 403                                 | 2  | 403                                 | 2  |
| KT-06-70 | 92                | 46               | 1.987                               | 0.05308                              | 0.00034 | 0.38225                             | 0.00878 | 0.05222                             | 0.00102 | 0.01649                              | 0.00030 | 332                                  | 12 | 329                                 | 3  | 328                                 | 3  |
| KT-06-71 | 356               | 177              | 2.012                               | 0.05276                              | 0.00018 | 0.37991                             | 0.00758 | 0.05220                             | 0.00098 | 0.01623                              | 0.00019 | 319                                  | 10 | 327                                 | 3  | 328                                 | 3  |
| KT-06-72 | 205               | 99               | 2.076                               | 0.05499                              | 0.00022 | 0.50394                             | 0.00956 | 0.06645                             | 0.00120 | 0.01941                              | 0.00020 | 412                                  | 10 | 414                                 | 3  | 415                                 | 4  |
| KT-06-73 | 44                | 17               | 2.645                               | 0.05249                              | 0.00056 | 0.34220                             | 0.00746 | 0.04729                             | 0.00048 | 0.01469                              | 0.00021 | 307                                  | 16 | 299                                 | 3  | 298                                 | 1  |
| KT-06-74 | 328               | 204              | 1.610                               | 0.05116                              | 0.00021 | 0.25893                             | 0.00258 | 0.03670                             | 0.00028 | 0.01122                              | 0.00008 | 248                                  | 5  | 234                                 | 1  | 232                                 | 1  |
| KT-06-75 | 102               | 61               | 1.676                               | 0.05257                              | 0.00030 | 0.34948                             | 0.00548 | 0.04821                             | 0.00060 | 0.01491                              | 0.00013 | 310                                  | 8  | 304                                 | 2  | 304                                 | 2  |
| KT-06-76 | 129               | 79               | 1.636                               | 0.05477                              | 0.00029 | 0.48386                             | 0.00746 | 0.06406                             | 0.00070 | 0.01955                              | 0.00016 | 403                                  | 8  | 401                                 | 3  | 400                                 | 2  |
| KT-06-77 | 86                | 65               | 1.320                               | 0.05288                              | 0.00039 | 0.35927                             | 0.00646 | 0.04928                             | 0.00062 | 0.01521                              | 0.00012 | 324                                  | 10 | 312                                 | 2  | 310                                 | 2  |
| KT-06-78 | 443               | 348              | 1.274                               | 0.05477                              | 0.00020 | 0.49230                             | 0.00640 | 0.06519                             | 0.00076 | 0.02001                              | 0.00015 | 403                                  | 7  | 406                                 | 2  | 407                                 | 2  |
| KT-06-79 | 173               | 141              | 1.225                               | 0.05201                              | 0.00026 | 0.34013                             | 0.00686 | 0.04741                             | 0.00082 | 0.01458                              | 0.00016 | 286                                  | 10 | 297                                 | 3  | 299                                 | 3  |
| KT-06-80 | 71                | 56               | 1.269                               | 0.05530                              | 0.00035 | 0.51689                             | 0.00748 | 0.06780                             | 0.00066 | 0.02152                              | 0.00015 | 424                                  | 8  | 423                                 | 3  | 423                                 | 2  |
| KT-06-81 | 121               | 66               | 1.830                               | 0.05278                              | 0.00025 | 0.36273                             | 0.00556 | 0.04985                             | 0.00068 | 0.01554                              | 0.00013 | 319                                  | 8  | 314                                 | 2  | 314                                 | 2  |
| KT-06-82 | 256               | 257              | 0.997                               | 0.05110                              | 0.00024 | 0.25398                             | 0.00400 | 0.03605                             | 0.00050 | 0.01099                              | 0.00008 | 245                                  | 8  | 230                                 | 2  | 228                                 | 2  |
| KT-06-83 | 105               | 47               | 2.235                               | 0.05499                              | 0.00032 | 0.49653                             | 0.00764 | 0.06548                             | 0.00074 | 0.02058                              | 0.00014 | 412                                  | 8  | 409                                 | 3  | 409                                 | 2  |

| Sample    | Content (μg/g)    |                  | <sup>232</sup> Th/ <sup>238</sup> U | Isotope ratio                        |         |                                     |         |                                     |         |                                      |         | Ages (Ma)                            |    |                                     |    |                                     |    |
|-----------|-------------------|------------------|-------------------------------------|--------------------------------------|---------|-------------------------------------|---------|-------------------------------------|---------|--------------------------------------|---------|--------------------------------------|----|-------------------------------------|----|-------------------------------------|----|
|           | <sup>232</sup> Th | <sup>238</sup> U |                                     | <sup>207</sup> Pb/ <sup>206</sup> Pb | 1σ      | <sup>207</sup> Pb/ <sup>235</sup> U | 1σ      | <sup>206</sup> Pb/ <sup>238</sup> U | 1σ      | <sup>208</sup> Pb/ <sup>232</sup> Th | 1σ      | <sup>207</sup> Pb/ <sup>206</sup> Pb | 1σ | <sup>207</sup> Pb/ <sup>235</sup> U | 1σ | <sup>206</sup> Pb/ <sup>238</sup> U | 1σ |
| KT-06-84  | 243               | 59               | 4.128                               | 0.05485                              | 0.00021 | 0.49908                             | 0.00846 | 0.06599                             | 0.00102 | 0.02004                              | 0.00024 | 406                                  | 8  | 411                                 | 3  | 412                                 | 3  |
| KT-06-85  | 76                | 21               | 3.682                               | 0.05260                              | 0.00040 | 0.32567                             | 0.00550 | 0.04492                             | 0.00046 | 0.01422                              | 0.00013 | 312                                  | 10 | 286                                 | 2  | 283                                 | 1  |
| KT-06-86  | 212               | 157              | 1.347                               | 0.05096                              | 0.00024 | 0.26139                             | 0.00380 | 0.03720                             | 0.00042 | 0.01153                              | 0.00008 | 239                                  | 8  | 236                                 | 2  | 235                                 | 1  |
| KT-06-87  | 428               | 182              | 2.351                               | 0.05308                              | 0.00017 | 0.37404                             | 0.00432 | 0.05110                             | 0.00048 | 0.01601                              | 0.00010 | 332                                  | 6  | 323                                 | 2  | 321                                 | 1  |
| KT-06-88  | 241               | 106              | 2.272                               | 0.05310                              | 0.00024 | 0.35761                             | 0.00496 | 0.04884                             | 0.00054 | 0.01510                              | 0.00011 | 333                                  | 7  | 310                                 | 2  | 307                                 | 2  |
| KT-06-89  | 129               | 95               | 1.356                               | 0.05577                              | 0.00024 | 0.50074                             | 0.00740 | 0.06510                             | 0.00074 | 0.01911                              | 0.00013 | 443                                  | 8  | 412                                 | 3  | 407                                 | 2  |
| KT-06-90  | 33                | 16               | 2.121                               | 0.05743                              | 0.00044 | 0.59035                             | 0.01130 | 0.07457                             | 0.00090 | 0.02303                              | 0.00020 | 508                                  | 11 | 471                                 | 4  | 464                                 | 3  |
| KT-06-91  | 40                | 28               | 1.421                               | 0.05357                              | 0.00048 | 0.32368                             | 0.00640 | 0.04383                             | 0.00050 | 0.01344                              | 0.00010 | 353                                  | 12 | 285                                 | 2  | 277                                 | 2  |
| KT-06-92  | 293               | 183              | 1.603                               | 0.05580                              | 0.00019 | 0.54259                             | 0.00608 | 0.07052                             | 0.00066 | 0.02151                              | 0.00013 | 444                                  | 6  | 440                                 | 2  | 439                                 | 2  |
| KT-06-93  | 100               | 51               | 1.950                               | 0.05236                              | 0.00030 | 0.33507                             | 0.00756 | 0.04641                             | 0.00094 | 0.01444                              | 0.00018 | 301                                  | 11 | 293                                 | 3  | 292                                 | 3  |
| KT-06-94  | 241               | 84               | 2.869                               | 0.05237                              | 0.00022 | 0.33054                             | 0.00464 | 0.04576                             | 0.00052 | 0.01410                              | 0.00010 | 302                                  | 7  | 290                                 | 2  | 288                                 | 2  |
| KT-06-95  | 257               | 106              | 2.415                               | 0.05305                              | 0.00022 | 0.36006                             | 0.00440 | 0.04922                             | 0.00050 | 0.01522                              | 0.00010 | 331                                  | 6  | 312                                 | 2  | 310                                 | 2  |
| KT-06-96  | 214               | 136              | 1.575                               | 0.05486                              | 0.00021 | 0.48270                             | 0.00524 | 0.06380                             | 0.00054 | 0.01940                              | 0.00011 | 407                                  | 6  | 400                                 | 2  | 399                                 | 2  |
| KT-06-97  | 207               | 108              | 1.921                               | 0.05517                              | 0.00021 | 0.51185                             | 0.00578 | 0.06727                             | 0.00058 | 0.02090                              | 0.00012 | 419                                  | 6  | 420                                 | 2  | 420                                 | 2  |
| KT-06-98  | 87                | 33               | 2.609                               | 0.05514                              | 0.00038 | 0.49399                             | 0.00724 | 0.06500                             | 0.00070 | 0.02067                              | 0.00014 | 418                                  | 8  | 408                                 | 2  | 406                                 | 2  |
| KT-06-99  | 133               | 86               | 1.537                               | 0.05252                              | 0.00025 | 0.34756                             | 0.00506 | 0.04799                             | 0.00054 | 0.01456                              | 0.00009 | 308                                  | 8  | 303                                 | 2  | 302                                 | 2  |
| KT-06-100 | 450               | 72               | 6.282                               | 0.05493                              | 0.00015 | 0.48457                             | 0.00366 | 0.06398                             | 0.00042 | 0.02115                              | 0.00014 | 409                                  | 4  | 401                                 | 1  | 400                                 | 1  |
| KT-07     |                   |                  |                                     |                                      |         |                                     |         |                                     |         |                                      |         |                                      |    |                                     |    |                                     |    |
| KT-07-1   | 106               | 69               | 1.532                               | 0.05161                              | 0.00063 | 0.19876                             | 0.00506 | 0.02796                             | 0.00024 | 0.00883                              | 0.00008 | 268                                  | 21 | 184                                 | 2  | 178                                 | 1  |
| KT-07-2   | 42                | 52               | 0.818                               | 0.05066                              | 0.00082 | 0.24398                             | 0.00810 | 0.03500                             | 0.00052 | 0.01085                              | 0.00012 | 226                                  | 25 | 222                                 | 3  | 222                                 | 2  |
| KT-07-3   | 216               | 158              | 1.367                               | 0.05320                              | 0.00040 | 0.38995                             | 0.00786 | 0.05320                             | 0.00060 | 0.01628                              | 0.00016 | 337                                  | 13 | 334                                 | 3  | 334                                 | 2  |
| KT-07-4   | 503               | 451              | 1.115                               | 0.05348                              | 0.00038 | 0.41902                             | 0.00876 | 0.05686                             | 0.00066 | 0.01741                              | 0.00018 | 349                                  | 14 | 355                                 | 3  | 357                                 | 2  |
| KT-07-5   | 202               | 91               | 2.221                               | 0.05250                              | 0.00043 | 0.39527                             | 0.00924 | 0.05465                             | 0.00066 | 0.01729                              | 0.00020 | 307                                  | 16 | 338                                 | 3  | 343                                 | 2  |
| KT-07-6   | 117               | 51               | 2.303                               | 0.05119                              | 0.00059 | 0.35003                             | 0.01192 | 0.04966                             | 0.00114 | 0.01607                              | 0.00028 | 249                                  | 20 | 305                                 | 4  | 312                                 | 4  |

| Sample   | Content (μg/g)    |                  | <sup>232</sup> Th/ <sup>238</sup> U | Isotope ratio                        |         |                                     |         |                                     |         |                                      |         | Ages (Ma)                            |    |                                     |    |                                     |    |
|----------|-------------------|------------------|-------------------------------------|--------------------------------------|---------|-------------------------------------|---------|-------------------------------------|---------|--------------------------------------|---------|--------------------------------------|----|-------------------------------------|----|-------------------------------------|----|
|          | <sup>232</sup> Th | <sup>238</sup> U |                                     | <sup>207</sup> Pb/ <sup>206</sup> Pb | 1σ      | <sup>207</sup> Pb/ <sup>235</sup> U | 1σ      | <sup>206</sup> Pb/ <sup>238</sup> U | 1σ      | <sup>208</sup> Pb/ <sup>232</sup> Th | 1σ      | <sup>207</sup> Pb/ <sup>206</sup> Pb | 1σ | <sup>207</sup> Pb/ <sup>235</sup> U | 1σ | <sup>206</sup> Pb/ <sup>238</sup> U | 1σ |
| KT-07-7  | 195               | 76               | 2.565                               | 0.05177                              | 0.00055 | 0.34210                             | 0.01042 | 0.04798                             | 0.00080 | 0.01447                              | 0.00019 | 275                                  | 20 | 299                                 | 4  | 302                                 | 2  |
| KT-07-8  | 196               | 89               | 2.200                               | 0.05137                              | 0.00058 | 0.32956                             | 0.01016 | 0.04658                             | 0.00064 | 0.01511                              | 0.00023 | 257                                  | 23 | 289                                 | 4  | 293                                 | 2  |
| KT-07-9  | 157               | 107              | 1.464                               | 0.05101                              | 0.00065 | 0.34921                             | 0.01066 | 0.04974                             | 0.00042 | 0.01594                              | 0.00022 | 241                                  | 27 | 304                                 | 4  | 313                                 | 1  |
| KT-07-10 | 58                | 46               | 1.265                               | 0.04967                              | 0.00114 | 0.18907                             | 0.00962 | 0.02765                             | 0.00034 | 0.00875                              | 0.00014 | 180                                  | 48 | 176                                 | 4  | 176                                 | 1  |
| KT-07-11 | 202               | 185              | 1.094                               | 0.05165                              | 0.00068 | 0.36502                             | 0.01312 | 0.05132                             | 0.00090 | 0.01609                              | 0.00028 | 270                                  | 25 | 316                                 | 5  | 323                                 | 3  |
| KT-07-12 | 250               | 168              | 1.488                               | 0.05198                              | 0.00061 | 0.36089                             | 0.01090 | 0.05042                             | 0.00058 | 0.01601                              | 0.00023 | 285                                  | 24 | 313                                 | 4  | 317                                 | 2  |
| KT-07-13 | 224               | 116              | 1.938                               | 0.05342                              | 0.00055 | 0.45493                             | 0.01236 | 0.06183                             | 0.00068 | 0.01970                              | 0.00025 | 347                                  | 21 | 381                                 | 4  | 387                                 | 2  |
| KT-07-14 | 169               | 88               | 1.930                               | 0.04969                              | 0.00059 | 0.20779                             | 0.00622 | 0.03035                             | 0.00038 | 0.01017                              | 0.00014 | 180                                  | 23 | 192                                 | 3  | 193                                 | 1  |
| KT-07-15 | 106               | 102              | 1.035                               | 0.05194                              | 0.00052 | 0.37066                             | 0.01074 | 0.05178                             | 0.00090 | 0.01609                              | 0.00022 | 283                                  | 18 | 320                                 | 4  | 325                                 | 3  |
| KT-07-16 | 407               | 344              | 1.186                               | 0.05260                              | 0.00035 | 0.38910                             | 0.00832 | 0.05369                             | 0.00078 | 0.01648                              | 0.00016 | 311                                  | 12 | 334                                 | 3  | 337                                 | 2  |
| KT-07-17 | 75                | 48               | 1.566                               | 0.05109                              | 0.00048 | 0.34875                             | 0.00728 | 0.04954                             | 0.00040 | 0.01582                              | 0.00013 | 245                                  | 16 | 304                                 | 3  | 312                                 | 1  |
| KT-07-18 | 41                | 22               | 1.904                               | 0.05118                              | 0.00064 | 0.36810                             | 0.01074 | 0.05215                             | 0.00064 | 0.01633                              | 0.00020 | 249                                  | 22 | 318                                 | 4  | 328                                 | 2  |
| KT-07-19 | 45                | 25               | 1.840                               | 0.04953                              | 0.00088 | 0.20771                             | 0.00754 | 0.03043                             | 0.00030 | 0.00996                              | 0.00010 | 173                                  | 33 | 192                                 | 3  | 193                                 | 1  |
| KT-07-20 | 179               | 93               | 1.916                               | 0.05174                              | 0.00029 | 0.31106                             | 0.00524 | 0.04360                             | 0.00058 | 0.01397                              | 0.00013 | 274                                  | 9  | 275                                 | 2  | 275                                 | 2  |
| KT-07-21 | 112               | 85               | 1.320                               | 0.05272                              | 0.00038 | 0.39372                             | 0.00806 | 0.05418                             | 0.00090 | 0.01741                              | 0.00018 | 317                                  | 11 | 337                                 | 3  | 340                                 | 3  |
| KT-07-22 | 193               | 132              | 1.466                               | 0.05418                              | 0.00096 | 0.42279                             | 0.01598 | 0.05657                             | 0.00056 | 0.01858                              | 0.00018 | 379                                  | 33 | 358                                 | 6  | 355                                 | 2  |
| KT-07-23 | 256               | 233              | 1.097                               | 0.04972                              | 0.00032 | 0.19955                             | 0.00522 | 0.02911                             | 0.00070 | 0.00930                              | 0.00013 | 182                                  | 14 | 185                                 | 2  | 185                                 | 2  |
| KT-07-24 | 166               | 83               | 1.997                               | 0.05316                              | 0.00027 | 0.39673                             | 0.00722 | 0.05411                             | 0.00078 | 0.01778                              | 0.00018 | 336                                  | 9  | 339                                 | 3  | 340                                 | 2  |
| KT-07-25 | 181               | 124              | 1.467                               | 0.05215                              | 0.00038 | 0.30421                             | 0.00516 | 0.04228                             | 0.00028 | 0.01365                              | 0.00010 | 292                                  | 13 | 270                                 | 2  | 267                                 | 1  |
| KT-07-26 | 70                | 45               | 1.537                               | 0.05790                              | 0.00041 | 0.68783                             | 0.01144 | 0.08614                             | 0.00084 | 0.02747                              | 0.00016 | 526                                  | 10 | 531                                 | 3  | 533                                 | 2  |
| KT-07-27 | 404               | 762              | 0.530                               | 0.05085                              | 0.00025 | 0.24720                             | 0.00278 | 0.03525                             | 0.00022 | 0.01035                              | 0.00005 | 234                                  | 7  | 224                                 | 1  | 223                                 | 1  |
| KT-07-28 | 855               | 801              | 1.067                               | 0.04997                              | 0.00020 | 0.19749                             | 0.00266 | 0.02865                             | 0.00032 | 0.00911                              | 0.00008 | 194                                  | 7  | 183                                 | 1  | 182                                 | 1  |
| KT-07-29 | 244               | 221              | 1.102                               | 0.05251                              | 0.00026 | 0.34134                             | 0.00490 | 0.04712                             | 0.00050 | 0.01459                              | 0.00011 | 308                                  | 8  | 298                                 | 2  | 297                                 | 2  |
| KT-07-30 | 212               | 144              | 1.475                               | 0.05255                              | 0.00028 | 0.34963                             | 0.00596 | 0.04824                             | 0.00068 | 0.01517                              | 0.00013 | 310                                  | 9  | 304                                 | 2  | 304                                 | 2  |

| Sample   | Content (µg/g)    |                  | <sup>232</sup> Th/ <sup>238</sup> U | Isotope ratio                        |         |                                     |         |                                     |         |                                      |         | Ages (Ma)                            |    |                                     |    |                                     |    |
|----------|-------------------|------------------|-------------------------------------|--------------------------------------|---------|-------------------------------------|---------|-------------------------------------|---------|--------------------------------------|---------|--------------------------------------|----|-------------------------------------|----|-------------------------------------|----|
|          | <sup>232</sup> Th | <sup>238</sup> U |                                     | <sup>207</sup> Pb/ <sup>206</sup> Pb | 1σ      | <sup>207</sup> Pb/ <sup>235</sup> U | 1σ      | <sup>206</sup> Pb/ <sup>238</sup> U | 1σ      | <sup>208</sup> Pb/ <sup>232</sup> Th | 1σ      | <sup>207</sup> Pb/ <sup>206</sup> Pb | 1σ | <sup>207</sup> Pb/ <sup>235</sup> U | 1σ | <sup>206</sup> Pb/ <sup>238</sup> U | 1σ |
| KT-07-31 | 53                | 44               | 1.219                               | 0.05401                              | 0.00067 | 0.35812                             | 0.01012 | 0.04805                             | 0.00056 | 0.01587                              | 0.00011 | 371                                  | 21 | 311                                 | 4  | 303                                 | 2  |
| KT-07-32 | 127               | 60               | 2.103                               | 0.05280                              | 0.00037 | 0.41132                             | 0.00598 | 0.05649                             | 0.00046 | 0.01530                              | 0.00011 | 320                                  | 9  | 350                                 | 2  | 354                                 | 1  |
| KT-07-33 | 216               | 135              | 1.602                               | 0.05270                              | 0.00030 | 0.36991                             | 0.00568 | 0.05091                             | 0.00064 | 0.01591                              | 0.00012 | 316                                  | 8  | 320                                 | 2  | 320                                 | 2  |
| KT-07-34 | 111               | 49               | 2.284                               | 0.05332                              | 0.00036 | 0.42127                             | 0.00800 | 0.05729                             | 0.00078 | 0.01804                              | 0.00017 | 342                                  | 10 | 357                                 | 3  | 359                                 | 2  |
| KT-07-35 | 207               | 214              | 0.968                               | 0.05097                              | 0.00030 | 0.27029                             | 0.00444 | 0.03844                             | 0.00042 | 0.01209                              | 0.00008 | 239                                  | 10 | 243                                 | 2  | 243                                 | 1  |
| KT-07-36 | 168               | 90               | 1.868                               | 0.05237                              | 0.00027 | 0.35916                             | 0.00746 | 0.04970                             | 0.00080 | 0.01555                              | 0.00016 | 302                                  | 11 | 312                                 | 3  | 313                                 | 2  |
| KT-07-37 | 196               | 146              | 1.342                               | 0.05299                              | 0.00028 | 0.39937                             | 0.00764 | 0.05464                             | 0.00090 | 0.01705                              | 0.00018 | 329                                  | 10 | 341                                 | 3  | 343                                 | 3  |
| KT-07-38 | 169               | 59               | 2.868                               | 0.05308                              | 0.00028 | 0.39037                             | 0.00756 | 0.05333                             | 0.00088 | 0.01723                              | 0.00021 | 332                                  | 10 | 335                                 | 3  | 335                                 | 3  |
| KT-07-39 | 646               | 275              | 2.352                               | 0.05235                              | 0.00017 | 0.36664                             | 0.00622 | 0.05079                             | 0.00082 | 0.01612                              | 0.00016 | 301                                  | 9  | 317                                 | 2  | 319                                 | 3  |
| KT-07-40 | 82                | 58               | 1.411                               | 0.05207                              | 0.00045 | 0.33503                             | 0.00898 | 0.04665                             | 0.00094 | 0.01453                              | 0.00017 | 288                                  | 14 | 293                                 | 3  | 294                                 | 3  |
| KT-07-41 | 165               | 81               | 2.028                               | 0.05314                              | 0.00030 | 0.41097                             | 0.00740 | 0.05607                             | 0.00074 | 0.01825                              | 0.00017 | 335                                  | 10 | 350                                 | 3  | 352                                 | 2  |
| KT-07-42 | 82                | 57               | 1.437                               | 0.05225                              | 0.00045 | 0.36573                             | 0.00960 | 0.05074                             | 0.00094 | 0.01586                              | 0.00015 | 296                                  | 15 | 316                                 | 4  | 319                                 | 3  |
| KT-07-43 | 665               | 205              | 3.237                               | 0.04955                              | 0.00020 | 0.18800                             | 0.00404 | 0.02751                             | 0.00056 | 0.00882                              | 0.00012 | 174                                  | 11 | 175                                 | 2  | 175                                 | 2  |
| KT-07-44 | 579               | 272              | 2.126                               | 0.04909                              | 0.00021 | 0.17848                             | 0.00366 | 0.02637                             | 0.00052 | 0.00834                              | 0.00011 | 152                                  | 11 | 167                                 | 2  | 168                                 | 2  |
| KT-07-45 | 99                | 58               | 1.711                               | 0.05623                              | 0.00034 | 0.56264                             | 0.00976 | 0.07258                             | 0.00104 | 0.02249                              | 0.00018 | 461                                  | 9  | 453                                 | 3  | 452                                 | 3  |
| KT-07-46 | 310               | 163              | 1.904                               | 0.04919                              | 0.00026 | 0.17204                             | 0.00298 | 0.02536                             | 0.00038 | 0.00797                              | 0.00008 | 157                                  | 9  | 161                                 | 1  | 161                                 | 1  |
| KT-07-47 | 98                | 45               | 2.162                               | 0.05298                              | 0.00037 | 0.38363                             | 0.00804 | 0.05253                             | 0.00090 | 0.01653                              | 0.00019 | 328                                  | 11 | 330                                 | 3  | 330                                 | 3  |
| KT-07-48 | 184               | 115              | 1.601                               | 0.05222                              | 0.00029 | 0.32757                             | 0.00518 | 0.04549                             | 0.00056 | 0.01433                              | 0.00012 | 295                                  | 8  | 288                                 | 2  | 287                                 | 2  |
| KT-07-49 | 236               | 137              | 1.717                               | 0.05231                              | 0.00025 | 0.33755                             | 0.00570 | 0.04681                             | 0.00074 | 0.01464                              | 0.00015 | 299                                  | 9  | 295                                 | 2  | 295                                 | 2  |
| KT-07-50 | 208               | 150              | 1.386                               | 0.05066                              | 0.00031 | 0.26262                             | 0.00568 | 0.03758                             | 0.00062 | 0.01192                              | 0.00013 | 225                                  | 12 | 237                                 | 2  | 238                                 | 2  |
| KT-07-51 | 111               | 89               | 1.248                               | 0.05299                              | 0.00033 | 0.37896                             | 0.00756 | 0.05186                             | 0.00084 | 0.01648                              | 0.00018 | 328                                  | 10 | 326                                 | 3  | 326                                 | 3  |
| KT-07-52 | 482               | 556              | 0.866                               | 0.04950                              | 0.00026 | 0.16802                             | 0.00194 | 0.02462                             | 0.00024 | 0.00757                              | 0.00005 | 172                                  | 6  | 158                                 | 1  | 157                                 | 1  |
| KT-07-53 | 379               | 389              | 0.973                               | 0.05242                              | 0.00023 | 0.31022                             | 0.00364 | 0.04292                             | 0.00044 | 0.01374                              | 0.00009 | 304                                  | 6  | 274                                 | 1  | 271                                 | 1  |
| KT-07-54 | 193               | 249              | 0.777                               | 0.05243                              | 0.00039 | 0.29693                             | 0.00600 | 0.04109                             | 0.00070 | 0.01248                              | 0.00012 | 304                                  | 10 | 264                                 | 2  | 260                                 | 2  |

| Sample   | Content (μg/g)    |                  | <sup>232</sup> Th/ <sup>238</sup> U | Isotope ratio                        |         |                                     |         |                                     |         |                                      |         | Ages (Ma)                            |    |                                     |    |                                     |    |
|----------|-------------------|------------------|-------------------------------------|--------------------------------------|---------|-------------------------------------|---------|-------------------------------------|---------|--------------------------------------|---------|--------------------------------------|----|-------------------------------------|----|-------------------------------------|----|
|          | <sup>232</sup> Th | <sup>238</sup> U |                                     | <sup>207</sup> Pb/ <sup>206</sup> Pb | 1σ      | <sup>207</sup> Pb/ <sup>235</sup> U | 1σ      | <sup>206</sup> Pb/ <sup>238</sup> U | 1σ      | <sup>208</sup> Pb/ <sup>232</sup> Th | 1σ      | <sup>207</sup> Pb/ <sup>206</sup> Pb | 1σ | <sup>207</sup> Pb/ <sup>235</sup> U | 1σ | <sup>206</sup> Pb/ <sup>238</sup> U | 1σ |
| KT-07-55 | 340               | 289              | 1.179                               | 0.04980                              | 0.00031 | 0.19651                             | 0.00328 | 0.02861                             | 0.00034 | 0.00905                              | 0.00007 | 186                                  | 9  | 182                                 | 1  | 182                                 | 1  |
| KT-07-56 | 194               | 58               | 3.331                               | 0.05084                              | 0.00028 | 0.30211                             | 0.00422 | 0.04308                             | 0.00040 | 0.01345                              | 0.00010 | 234                                  | 8  | 268                                 | 2  | 272                                 | 1  |
| KT-07-57 | 43                | 35               | 1.225                               | 0.05089                              | 0.00071 | 0.25153                             | 0.00806 | 0.03582                             | 0.00052 | 0.01108                              | 0.00012 | 236                                  | 24 | 228                                 | 3  | 227                                 | 2  |
| KT-07-58 | 66                | 34               | 1.934                               | 0.05210                              | 0.00050 | 0.33998                             | 0.00932 | 0.04734                             | 0.00104 | 0.01482                              | 0.00020 | 290                                  | 14 | 297                                 | 4  | 298                                 | 3  |
| KT-07-59 | 26                | 12               | 2.120                               | 0.05224                              | 0.00084 | 0.34315                             | 0.01300 | 0.04762                             | 0.00090 | 0.01495                              | 0.00027 | 296                                  | 26 | 300                                 | 5  | 300                                 | 3  |
| KT-07-60 | 258               | 192              | 1.346                               | 0.04986                              | 0.00031 | 0.19910                             | 0.00398 | 0.02895                             | 0.00046 | 0.00894                              | 0.00009 | 189                                  | 11 | 184                                 | 2  | 184                                 | 1  |
| KT-07-61 | 173               | 90               | 1.922                               | 0.05333                              | 0.00034 | 0.39945                             | 0.00756 | 0.05430                             | 0.00076 | 0.01719                              | 0.00021 | 343                                  | 10 | 341                                 | 3  | 341                                 | 2  |
| KT-07-62 | 338               | 188              | 1.798                               | 0.05272                              | 0.00023 | 0.36568                             | 0.00520 | 0.05028                             | 0.00054 | 0.01549                              | 0.00012 | 317                                  | 8  | 316                                 | 2  | 316                                 | 2  |
| KT-07-63 | 467               | 415              | 1.125                               | 0.05266                              | 0.00020 | 0.36649                             | 0.00658 | 0.05047                             | 0.00088 | 0.01555                              | 0.00016 | 314                                  | 9  | 317                                 | 2  | 317                                 | 3  |
| KT-07-64 | 99                | 67               | 1.482                               | 0.05629                              | 0.00032 | 0.57963                             | 0.01126 | 0.07469                             | 0.00132 | 0.02317                              | 0.00029 | 464                                  | 10 | 464                                 | 4  | 464                                 | 4  |
| KT-07-65 | 178               | 88               | 2.021                               | 0.05205                              | 0.00030 | 0.32532                             | 0.00722 | 0.04535                             | 0.00094 | 0.01499                              | 0.00022 | 287                                  | 11 | 286                                 | 3  | 286                                 | 3  |
| KT-07-66 | 89                | 34               | 2.603                               | 0.05284                              | 0.00038 | 0.37483                             | 0.00672 | 0.05144                             | 0.00056 | 0.01654                              | 0.00015 | 322                                  | 11 | 323                                 | 2  | 323                                 | 2  |
| KT-07-67 | 38                | 38               | 1.006                               | 0.05027                              | 0.00088 | 0.20896                             | 0.00750 | 0.03015                             | 0.00034 | 0.00904                              | 0.00009 | 207                                  | 31 | 193                                 | 3  | 191                                 | 1  |
| KT-07-68 | 81                | 34               | 2.396                               | 0.05313                              | 0.00045 | 0.38674                             | 0.00684 | 0.05280                             | 0.00052 | 0.01640                              | 0.00013 | 334                                  | 11 | 332                                 | 3  | 332                                 | 2  |
| KT-07-69 | 136               | 90               | 1.505                               | 0.04958                              | 0.00043 | 0.18674                             | 0.00408 | 0.02732                             | 0.00042 | 0.00861                              | 0.00008 | 175                                  | 13 | 174                                 | 2  | 174                                 | 1  |
| KT-07-70 | 239               | 143              | 1.671                               | 0.05223                              | 0.00024 | 0.34885                             | 0.00568 | 0.04842                             | 0.00064 | 0.01468                              | 0.00012 | 295                                  | 8  | 304                                 | 2  | 305                                 | 2  |
| KT-07-71 | 82                | 62               | 1.315                               | 0.05192                              | 0.00036 | 0.36335                             | 0.00718 | 0.05071                             | 0.00064 | 0.01570                              | 0.00015 | 282                                  | 12 | 315                                 | 3  | 319                                 | 2  |
| KT-07-72 | 225               | 73               | 3.062                               | 0.05290                              | 0.00024 | 0.42348                             | 0.00526 | 0.05803                             | 0.00048 | 0.01793                              | 0.00011 | 325                                  | 7  | 359                                 | 2  | 364                                 | 1  |
| KT-07-73 | 416               | 379              | 1.099                               | 0.05221                              | 0.00017 | 0.37404                             | 0.00458 | 0.05195                             | 0.00058 | 0.01608                              | 0.00013 | 295                                  | 6  | 323                                 | 2  | 326                                 | 2  |
| KT-07-74 | 143               | 41               | 3.451                               | 0.05335                              | 0.00032 | 0.40956                             | 0.00732 | 0.05565                             | 0.00070 | 0.01721                              | 0.00015 | 344                                  | 10 | 349                                 | 3  | 349                                 | 2  |
| KT-07-75 | 371               | 311              | 1.192                               | 0.05110                              | 0.00022 | 0.27899                             | 0.00520 | 0.03960                             | 0.00070 | 0.01206                              | 0.00012 | 245                                  | 10 | 250                                 | 2  | 250                                 | 2  |
| KT-07-76 | 53                | 82               | 0.649                               | 0.04991                              | 0.00066 | 0.20041                             | 0.00580 | 0.02912                             | 0.00040 | 0.00921                              | 0.00008 | 191                                  | 21 | 185                                 | 2  | 185                                 | 1  |
| KT-07-77 | 220               | 124              | 1.780                               | 0.04972                              | 0.00037 | 0.19892                             | 0.00380 | 0.02902                             | 0.00040 | 0.00898                              | 0.00007 | 182                                  | 11 | 184                                 | 2  | 184                                 | 1  |
| KT-07-78 | 160               | 62               | 2.573                               | 0.05324                              | 0.00030 | 0.38516                             | 0.00628 | 0.05245                             | 0.00064 | 0.01664                              | 0.00013 | 339                                  | 9  | 331                                 | 2  | 330                                 | 2  |



| Sample    | Content (μg/g)    |                  | $^{232}\text{Th}/^{238}\text{U}$ | Isotope ratio                     |         |                                  |         |                                  |         |                                   |         | Ages (Ma)                         |     |                                  |    |                                  |    |
|-----------|-------------------|------------------|----------------------------------|-----------------------------------|---------|----------------------------------|---------|----------------------------------|---------|-----------------------------------|---------|-----------------------------------|-----|----------------------------------|----|----------------------------------|----|
|           | $^{232}\text{Th}$ | $^{238}\text{U}$ |                                  | $^{207}\text{Pb}/^{206}\text{Pb}$ | 1σ      | $^{207}\text{Pb}/^{235}\text{U}$ | 1σ      | $^{206}\text{Pb}/^{238}\text{U}$ | 1σ      | $^{208}\text{Pb}/^{232}\text{Th}$ | 1σ      | $^{207}\text{Pb}/^{206}\text{Pb}$ | 1σ  | $^{207}\text{Pb}/^{235}\text{U}$ | 1σ | $^{206}\text{Pb}/^{238}\text{U}$ | 1σ |
| KT-07-79  | 460               | 135              | 3.418                            | 0.04960                           | 0.00027 | 0.19154                          | 0.00394 | 0.02799                          | 0.00046 | 0.00882                           | 0.00009 | 176                               | 11  | 178                              | 2  | 178                              | 1  |
| KT-07-80  | 102               | 60               | 1.707                            | 0.05320                           | 0.00259 | 0.38041                          | 0.03608 | 0.05186                          | 0.00116 | 0.01625                           | 0.00014 | 337                               | 113 | 327                              | 13 | 326                              | 4  |
| KT-07-81  | 181               | 144              | 1.261                            | 0.05004                           | 0.00035 | 0.19436                          | 0.00370 | 0.02817                          | 0.00040 | 0.00884                           | 0.00008 | 197                               | 10  | 180                              | 2  | 179                              | 1  |
| KT-07-82  | 313               | 198              | 1.581                            | 0.05683                           | 0.00021 | 0.63730                          | 0.01456 | 0.08130                          | 0.00170 | 0.02566                           | 0.00042 | 485                               | 11  | 501                              | 5  | 504                              | 5  |
| KT-07-83  | 119               | 51               | 2.351                            | 0.04993                           | 0.00049 | 0.19456                          | 0.00414 | 0.02828                          | 0.00038 | 0.00898                           | 0.00008 | 192                               | 13  | 181                              | 2  | 180                              | 1  |
| KT-07-84  | 162               | 123              | 1.322                            | 0.05249                           | 0.00032 | 0.35474                          | 0.00712 | 0.04900                          | 0.00076 | 0.01545                           | 0.00016 | 307                               | 11  | 308                              | 3  | 308                              | 2  |
| KT-07-85  | 30                | 12               | 2.620                            | 0.05239                           | 0.00076 | 0.34795                          | 0.01048 | 0.04821                          | 0.00068 | 0.01570                           | 0.00024 | 302                               | 21  | 303                              | 4  | 304                              | 2  |
| KT-07-86  | 110               | 60               | 1.814                            | 0.05216                           | 0.00031 | 0.34661                          | 0.00618 | 0.04820                          | 0.00070 | 0.01470                           | 0.00011 | 292                               | 9   | 302                              | 2  | 303                              | 2  |
| KT-07-87  | 70                | 26               | 2.716                            | 0.05208                           | 0.00049 | 0.32506                          | 0.00656 | 0.04528                          | 0.00046 | 0.01436                           | 0.00012 | 289                               | 14  | 286                              | 3  | 285                              | 1  |
| KT-07-88  | 141               | 147              | 0.956                            | 0.04944                           | 0.00049 | 0.18810                          | 0.00536 | 0.02760                          | 0.00060 | 0.00875                           | 0.00012 | 169                               | 15  | 175                              | 2  | 176                              | 2  |
| KT-07-89  | 85                | 117              | 0.723                            | 0.04955                           | 0.00054 | 0.18060                          | 0.00436 | 0.02644                          | 0.00034 | 0.00821                           | 0.00007 | 174                               | 16  | 169                              | 2  | 168                              | 1  |
| KT-07-90  | 97                | 66               | 1.472                            | 0.05189                           | 0.00037 | 0.33641                          | 0.00700 | 0.04705                          | 0.00088 | 0.01488                           | 0.00017 | 281                               | 11  | 294                              | 3  | 296                              | 3  |
| KT-07-91  | 71                | 28               | 2.556                            | 0.05296                           | 0.00043 | 0.35663                          | 0.00658 | 0.04884                          | 0.00052 | 0.01545                           | 0.00015 | 327                               | 12  | 310                              | 2  | 307                              | 2  |
| KT-07-92  | 90                | 21               | 4.200                            | 0.07052                           | 0.00029 | 1.55896                          | 0.03676 | 0.16031                          | 0.00356 | 0.05000                           | 0.00082 | 944                               | 11  | 954                              | 7  | 958                              | 10 |
| KT-07-93  | 34                | 37               | 0.909                            | 0.04974                           | 0.00090 | 0.19331                          | 0.00694 | 0.02825                          | 0.00046 | 0.00878                           | 0.00009 | 183                               | 26  | 179                              | 3  | 180                              | 1  |
| KT-07-94  | 120               | 131              | 0.918                            | 0.05099                           | 0.00036 | 0.25531                          | 0.00418 | 0.03632                          | 0.00038 | 0.01126                           | 0.00007 | 241                               | 10  | 231                              | 2  | 230                              | 1  |
| KT-07-95  | 146               | 94               | 1.562                            | 0.04965                           | 0.00075 | 0.18061                          | 0.00762 | 0.02631                          | 0.00048 | 0.00832                           | 0.00014 | 179                               | 32  | 169                              | 3  | 167                              | 2  |
| KT-07-96  | 133               | 87               | 1.532                            | 0.05286                           | 0.00030 | 0.37814                          | 0.00586 | 0.05189                          | 0.00060 | 0.01609                           | 0.00013 | 323                               | 8   | 326                              | 2  | 326                              | 2  |
| KT-07-97  | 120               | 77               | 1.553                            | 0.05096                           | 0.00043 | 0.26007                          | 0.00486 | 0.03702                          | 0.00044 | 0.01143                           | 0.00009 | 239                               | 11  | 235                              | 2  | 234                              | 1  |
| KT-07-98  | 48                | 43               | 1.134                            | 0.05083                           | 0.00087 | 0.18337                          | 0.00590 | 0.02622                          | 0.00036 | 0.00814                           | 0.00008 | 233                               | 24  | 171                              | 3  | 167                              | 1  |
| KT-07-99  | 134               | 50               | 2.671                            | 0.05601                           | 0.00028 | 0.56841                          | 0.01156 | 0.07363                          | 0.00148 | 0.02240                           | 0.00027 | 453                               | 10  | 457                              | 4  | 458                              | 4  |
| KT-07-100 | 156               | 71               | 2.189                            | 0.05251                           | 0.00033 | 0.34283                          | 0.00514 | 0.04734                          | 0.00042 | 0.01427                           | 0.00009 | 308                               | 9   | 299                              | 2  | 298                              | 1  |

Table S2. Detrital zircon Hf isotope data and two-stage model ages of the samples.

| Sample   | T (Ma) | $^{176}\text{Yb}/^{177}\text{Hf}$ (corr) | $2\sigma$ | $^{176}\text{Lu}/^{177}\text{Hf}$ (corr) | $2\sigma$ | $^{176}\text{Hf}/^{177}\text{Hf}$ (corr) | $2\sigma$ | Hf       | $\varepsilon\text{Hf}$ (t) | $\pm 1\sigma$ | T(DM1) (Ga) | $\pm 1\sigma$ | T (DM2) (Ga) | $\pm 1\sigma$ |
|----------|--------|------------------------------------------|-----------|------------------------------------------|-----------|------------------------------------------|-----------|----------|----------------------------|---------------|-------------|---------------|--------------|---------------|
| KT-01    |        |                                          |           |                                          |           |                                          |           |          |                            |               |             |               |              |               |
| KT-01-1  | 322    | 5.03E-02                                 | 2.34E-03  | 1.77E-03                                 | 7.20E-05  | 0.282997                                 | 0.000028  | 0.282986 | 14.66                      | 0.98          | 0.37        | 0.04          | 0.40         | 0.04          |
| KT-01-2  | 342    | 3.62E-02                                 | 8.90E-04  | 1.28E-03                                 | 2.60E-05  | 0.282972                                 | 0.000025  | 0.282964 | 14.31                      | 0.88          | 0.40        | 0.04          | 0.43         | 0.04          |
| KT-01-4  | 360    | 2.76E-02                                 | 2.40E-03  | 9.29E-04                                 | 7.10E-05  | 0.282965                                 | 0.000027  | 0.282959 | 14.52                      | 0.95          | 0.41        | 0.04          | 0.43         | 0.04          |
| KT-01-7  | 297    | 4.17E-02                                 | 1.07E-03  | 1.40E-03                                 | 4.10E-05  | 0.282955                                 | 0.000026  | 0.282947 | 12.73                      | 0.91          | 0.43        | 0.04          | 0.50         | 0.04          |
| KT-01-11 | 310    | 2.75E-02                                 | 2.18E-04  | 9.23E-04                                 | 3.00E-06  | 0.28291                                  | 0.000034  | 0.282905 | 11.51                      | 1.19          | 0.48        | 0.05          | 0.59         | 0.05          |
| KT-01-14 | 283    | 3.65E-02                                 | 2.08E-04  | 1.22E-03                                 | 7.00E-06  | 0.282937                                 | 0.000024  | 0.282931 | 11.83                      | 0.84          | 0.45        | 0.03          | 0.55         | 0.03          |
| KT-01-26 | 406    | 6.19E-02                                 | 1.85E-03  | 2.20E-03                                 | 5.10E-05  | 0.282886                                 | 0.000029  | 0.282869 | 12.38                      | 1.02          | 0.54        | 0.04          | 0.61         | 0.04          |
| KT-01-28 | 245    | 4.54E-02                                 | 4.06E-04  | 1.53E-03                                 | 2.50E-05  | 0.282955                                 | 0.000022  | 0.282948 | 11.61                      | 0.77          | 0.43        | 0.03          | 0.53         | 0.03          |
| KT-01-33 | 304    | 5.20E-02                                 | 2.74E-03  | 1.76E-03                                 | 8.70E-05  | 0.282965                                 | 0.000026  | 0.282955 | 13.16                      | 0.91          | 0.42        | 0.04          | 0.48         | 0.04          |
| KT-01-37 | 333    | 2.33E-02                                 | 3.26E-04  | 8.64E-04                                 | 1.10E-05  | 0.282942                                 | 0.00002   | 0.282937 | 13.15                      | 0.70          | 0.44        | 0.03          | 0.50         | 0.03          |
| KT-01-39 | 453    | 3.52E-02                                 | 8.14E-04  | 1.24E-03                                 | 3.60E-05  | 0.282923                                 | 0.000027  | 0.282913 | 14.95                      | 0.95          | 0.47        | 0.04          | 0.48         | 0.04          |
| KT-01-44 | 351    | 3.35E-02                                 | 6.38E-04  | 1.21E-03                                 | 2.90E-05  | 0.283005                                 | 0.000021  | 0.282997 | 15.68                      | 0.74          | 0.35        | 0.03          | 0.35         | 0.03          |
| KT-01-48 | 316    | 3.92E-02                                 | 1.02E-03  | 1.47E-03                                 | 3.60E-05  | 0.282834                                 | 0.00003   | 0.282825 | 8.83                       | 1.05          | 0.60        | 0.04          | 0.76         | 0.04          |
| KT-01-49 | 384    | 1.17E-02                                 | 3.78E-04  | 5.41E-04                                 | 1.60E-05  | 0.282999                                 | 0.000021  | 0.282995 | 16.34                      | 0.74          | 0.35        | 0.03          | 0.34         | 0.03          |
| KT-01-52 | 338    | 3.43E-02                                 | 9.60E-04  | 1.29E-03                                 | 4.80E-05  | 0.283009                                 | 0.000024  | 0.283001 | 15.53                      | 0.84          | 0.35        | 0.03          | 0.35         | 0.03          |
| KT-01-53 | 347    | 5.10E-02                                 | 9.96E-04  | 1.67E-03                                 | 3.00E-05  | 0.282979                                 | 0.000022  | 0.282968 | 14.57                      | 0.77          | 0.39        | 0.03          | 0.42         | 0.03          |
| KT-01-54 | 369    | 5.81E-02                                 | 1.57E-03  | 1.88E-03                                 | 4.00E-05  | 0.282994                                 | 0.000027  | 0.282981 | 15.51                      | 0.95          | 0.37        | 0.04          | 0.38         | 0.04          |
| KT-01-57 | 235    | 3.12E-02                                 | 3.52E-04  | 1.08E-03                                 | 1.90E-05  | 0.282989                                 | 0.000025  | 0.282984 | 12.67                      | 0.88          | 0.37        | 0.04          | 0.46         | 0.04          |
| KT-01-60 | 403    | 4.65E-02                                 | 9.58E-04  | 1.66E-03                                 | 4.60E-05  | 0.283006                                 | 0.000022  | 0.282993 | 16.70                      | 0.77          | 0.35        | 0.03          | 0.33         | 0.03          |
| KT-01-65 | 352    | 4.28E-02                                 | 2.66E-03  | 1.48E-03                                 | 9.10E-05  | 0.282944                                 | 0.000026  | 0.282934 | 13.48                      | 0.91          | 0.44        | 0.04          | 0.49         | 0.04          |
| KT-01-83 | 300    | 2.26E-02                                 | 1.75E-03  | 8.16E-04                                 | 5.60E-05  | 0.282987                                 | 0.000033  | 0.282982 | 14.04                      | 1.16          | 0.37        | 0.05          | 0.42         | 0.05          |
| KT-01-86 | 295    | 2.62E-02                                 | 3.20E-04  | 9.57E-04                                 | 1.20E-05  | 0.282917                                 | 0.000028  | 0.282912 | 11.43                      | 0.98          | 0.47        | 0.04          | 0.58         | 0.04          |
| KT-02    |        |                                          |           |                                          |           |                                          |           |          |                            |               |             |               |              |               |

| Sample   | T (Ma) | $^{176}\text{Yb}/^{177}\text{Hf}$ (corr) | $2\sigma$ | $^{176}\text{Lu}/^{177}\text{Hf}$ (corr) | $2\sigma$ | $^{176}\text{Hf}/^{177}\text{Hf}$ (corr) | $2\sigma$ | Hf       | $\varepsilon\text{Hf}$ (t) | $\pm 1\sigma$ | T(DM1) (Ga) | $\pm 1\sigma$ | T (DM2) (Ga) | $\pm 1\sigma$ |
|----------|--------|------------------------------------------|-----------|------------------------------------------|-----------|------------------------------------------|-----------|----------|----------------------------|---------------|-------------|---------------|--------------|---------------|
| KT-02-1  | 320    | 2.69E-02                                 | 7.86E-04  | 1.07E-03                                 | 3.00E-05  | 0.282974                                 | 0.000029  | 0.282968 | 13.96                      | 1.02          | 0.39        | 0.04          | 0.44         | 0.04          |
| KT-02-2  | 409    | 1.48E-02                                 | 5.42E-04  | 6.86E-04                                 | 2.70E-05  | 0.282752                                 | 0.000026  | 0.282747 | 8.10                       | 0.91          | 0.70        | 0.04          | 0.88         | 0.04          |
| KT-02-6  | 430    | 6.33E-02                                 | 5.22E-03  | 2.19E-03                                 | 1.73E-04  | 0.282646                                 | 0.000029  | 0.282628 | 4.38                       | 1.02          | 0.89        | 0.04          | 1.13         | 0.04          |
| KT-02-8  | 504    | 1.58E-02                                 | 3.32E-04  | 5.40E-04                                 | 9.00E-06  | 0.282195                                 | 0.000021  | 0.28219  | -9.51                      | 0.74          | 1.47        | 0.03          | 2.07         | 0.03          |
| KT-02-9  | 270    | 5.20E-02                                 | 1.74E-04  | 1.86E-03                                 | 1.30E-05  | 0.282904                                 | 0.00003   | 0.282895 | 10.27                      | 1.05          | 0.51        | 0.04          | 0.64         | 0.04          |
| KT-02-10 | 303    | 3.42E-02                                 | 8.00E-04  | 1.13E-03                                 | 2.20E-05  | 0.282771                                 | 0.000025  | 0.282765 | 6.40                       | 0.88          | 0.68        | 0.04          | 0.91         | 0.04          |
| KT-02-12 | 449    | 4.14E-02                                 | 9.08E-04  | 1.47E-03                                 | 3.70E-05  | 0.282617                                 | 0.000028  | 0.282605 | 3.96                       | 0.98          | 0.91        | 0.04          | 1.18         | 0.04          |
| KT-02-15 | 401    | 3.99E-02                                 | 1.63E-03  | 1.48E-03                                 | 5.50E-05  | 0.282622                                 | 0.00003   | 0.282611 | 3.12                       | 1.05          | 0.90        | 0.04          | 1.19         | 0.04          |
| KT-02-17 | 343    | 3.54E-02                                 | 3.94E-04  | 1.35E-03                                 | 2.00E-05  | 0.282931                                 | 0.000034  | 0.282922 | 12.86                      | 1.19          | 0.46        | 0.05          | 0.53         | 0.05          |
| KT-02-19 | 420    | 3.87E-02                                 | 6.98E-04  | 1.45E-03                                 | 2.30E-05  | 0.282641                                 | 0.000032  | 0.28263  | 4.20                       | 1.12          | 0.88        | 0.05          | 1.14         | 0.05          |
| KT-02-20 | 379    | 9.10E-02                                 | 1.93E-03  | 3.16E-03                                 | 5.90E-05  | 0.282877                                 | 0.000036  | 0.282855 | 11.26                      | 1.26          | 0.56        | 0.05          | 0.66         | 0.05          |
| KT-02-21 | 289    | 2.37E-02                                 | 5.36E-04  | 8.20E-04                                 | 1.50E-05  | 0.2828                                   | 0.000029  | 0.282796 | 7.18                       | 1.02          | 0.64        | 0.04          | 0.85         | 0.04          |
| KT-02-23 | 410    | 3.59E-02                                 | 8.28E-04  | 1.30E-03                                 | 3.20E-05  | 0.282622                                 | 0.000032  | 0.282612 | 3.36                       | 1.12          | 0.90        | 0.05          | 1.18         | 0.05          |
| KT-02-26 | 412    | 2.63E-02                                 | 5.28E-04  | 9.65E-04                                 | 1.50E-05  | 0.282608                                 | 0.000031  | 0.282601 | 3.00                       | 1.09          | 0.91        | 0.04          | 1.21         | 0.04          |
| KT-02-27 | 396    | 3.49E-02                                 | 5.64E-04  | 1.27E-03                                 | 2.20E-05  | 0.282651                                 | 0.000022  | 0.282642 | 4.10                       | 0.77          | 0.86        | 0.03          | 1.13         | 0.03          |
| KT-02-28 | 285    | 2.52E-02                                 | 1.10E-04  | 8.95E-04                                 | 2.00E-06  | 0.282968                                 | 0.000033  | 0.282963 | 13.03                      | 1.16          | 0.40        | 0.05          | 0.47         | 0.05          |
| KT-02-29 | 291    | 2.87E-02                                 | 4.64E-04  | 9.86E-04                                 | 1.60E-05  | 0.282839                                 | 0.000025  | 0.282834 | 8.57                       | 0.88          | 0.59        | 0.04          | 0.76         | 0.04          |
| KT-02-32 | 310    | 6.59E-02                                 | 2.60E-03  | 2.29E-03                                 | 9.50E-05  | 0.282898                                 | 0.000036  | 0.282885 | 10.80                      | 1.26          | 0.52        | 0.05          | 0.63         | 0.05          |
| KT-02-33 | 496    | 4.08E-02                                 | 8.46E-04  | 1.42E-03                                 | 3.20E-05  | 0.282597                                 | 0.000026  | 0.282584 | 4.26                       | 0.91          | 0.94        | 0.04          | 1.19         | 0.04          |
| KT-02-35 | 386    | 3.39E-02                                 | 8.20E-04  | 1.19E-03                                 | 2.10E-05  | 0.282669                                 | 0.000027  | 0.28266  | 4.54                       | 0.95          | 0.83        | 0.04          | 1.09         | 0.04          |
| KT-02-37 | 425    | 4.41E-02                                 | 2.90E-04  | 1.53E-03                                 | 5.00E-06  | 0.282765                                 | 0.000025  | 0.282753 | 8.67                       | 0.88          | 0.70        | 0.04          | 0.86         | 0.04          |
| KT-02-48 | 437    | 5.05E-02                                 | 2.12E-03  | 1.80E-03                                 | 6.40E-05  | 0.282625                                 | 0.000025  | 0.28261  | 3.89                       | 0.88          | 0.91        | 0.04          | 1.17         | 0.04          |
| KT-02-51 | 331    | 3.44E-02                                 | 1.07E-03  | 1.21E-03                                 | 4.40E-05  | 0.282789                                 | 0.000026  | 0.282782 | 7.61                       | 0.91          | 0.66        | 0.04          | 0.85         | 0.04          |
| KT-02-59 | 317    | 2.95E-02                                 | 8.54E-04  | 1.04E-03                                 | 2.80E-05  | 0.282817                                 | 0.00002   | 0.282811 | 8.34                       | 0.70          | 0.62        | 0.03          | 0.80         | 0.03          |
| KT-02-67 | 276    | 5.32E-02                                 | 2.12E-03  | 1.92E-03                                 | 7.10E-05  | 0.282825                                 | 0.000032  | 0.282815 | 7.59                       | 1.12          | 0.62        | 0.05          | 0.81         | 0.05          |

| Sample   | T (Ma) | $^{176}\text{Yb}/^{177}\text{Hf}$ (corr) | $2\sigma$ | $^{176}\text{Lu}/^{177}\text{Hf}$ (corr) | $2\sigma$ | $^{176}\text{Hf}/^{177}\text{Hf}$ (corr) | $2\sigma$ | Hf       | $\varepsilon\text{Hf}$ (t) | $\pm 1\sigma$ | T(DM1) (Ga) | $\pm 1\sigma$ | T (DM2) (Ga) | $\pm 1\sigma$ |
|----------|--------|------------------------------------------|-----------|------------------------------------------|-----------|------------------------------------------|-----------|----------|----------------------------|---------------|-------------|---------------|--------------|---------------|
| KT-02-68 | 528    | 1.65E-02                                 | 4.70E-04  | 7.63E-04                                 | 1.90E-05  | 0.282816                                 | 0.00002   | 0.282808 | 12.92                      | 0.70          | 0.61        | 0.03          | 0.67         | 0.03          |
| KT-02-69 | 298    | 3.86E-02                                 | 4.02E-03  | 1.47E-03                                 | 1.40E-04  | 0.282822                                 | 0.000023  | 0.282814 | 8.03                       | 0.81          | 0.62        | 0.03          | 0.80         | 0.03          |
| KT-02-70 | 477    | 4.82E-02                                 | 1.22E-03  | 1.79E-03                                 | 4.40E-05  | 0.282611                                 | 0.000027  | 0.282595 | 4.24                       | 0.95          | 0.93        | 0.04          | 1.18         | 0.04          |
| KT-02-71 | 325    | 2.53E-02                                 | 1.80E-04  | 8.73E-04                                 | 4.00E-06  | 0.282835                                 | 0.000021  | 0.28283  | 9.18                       | 0.74          | 0.59        | 0.03          | 0.75         | 0.03          |
| KT-02-76 | 845    | 2.14E-02                                 | 1.01E-03  | 9.16E-04                                 | 4.30E-05  | 0.282073                                 | 0.000022  | 0.282058 | -6.60                      | 0.77          | 1.66        | 0.03          | 2.14         | 0.03          |
| KT-02-84 | 382    | 3.14E-02                                 | 9.94E-04  | 1.17E-03                                 | 3.60E-05  | 0.282654                                 | 0.000025  | 0.282646 | 3.93                       | 0.88          | 0.85        | 0.04          | 1.13         | 0.04          |
| KT-02-89 | 332    | 2.90E-02                                 | 6.30E-04  | 1.16E-03                                 | 2.40E-05  | 0.282967                                 | 0.000031  | 0.28296  | 13.94                      | 1.09          | 0.41        | 0.04          | 0.45         | 0.04          |
| KT-02-91 | 258    | 2.68E-02                                 | 3.50E-04  | 1.01E-03                                 | 1.10E-05  | 0.282858                                 | 0.000025  | 0.282853 | 8.54                       | 0.88          | 0.56        | 0.04          | 0.74         | 0.04          |
| KT-02-93 | 397    | 4.34E-02                                 | 4.94E-04  | 1.69E-03                                 | 2.40E-05  | 0.282679                                 | 0.000027  | 0.282666 | 5.00                       | 0.95          | 0.83        | 0.04          | 1.07         | 0.04          |
| KT-02-96 | 395    | 3.87E-02                                 | 8.62E-04  | 1.54E-03                                 | 4.40E-05  | 0.282671                                 | 0.00002   | 0.28266  | 4.71                       | 0.70          | 0.84        | 0.03          | 1.09         | 0.03          |
| KT-02-97 | 391    | 2.20E-02                                 | 1.41E-03  | 9.04E-04                                 | 5.40E-05  | 0.282615                                 | 0.000022  | 0.282608 | 2.81                       | 0.77          | 0.90        | 0.03          | 1.20         | 0.03          |
| KT-02-99 | 493    | 6.34E-02                                 | 2.36E-03  | 2.52E-03                                 | 8.30E-05  | 0.282736                                 | 0.000038  | 0.282713 | 8.76                       | 1.33          | 0.76        | 0.06          | 0.90         | 0.06          |
| KT-03    |        |                                          |           |                                          |           |                                          |           |          |                            |               |             |               |              |               |
| KT-03-1  | 296    | 3.62E-02                                 | 1.41E-03  | 1.31E-03                                 | 5.30E-05  | 0.2829                                   | 0.000024  | 0.282893 | 10.78                      | 0.84          | 0.50        | 0.03          | 0.62         | 0.03          |
| KT-03-2  | 264    | 1.83E-02                                 | 1.65E-04  | 6.99E-04                                 | 6.00E-06  | 0.282931                                 | 0.000026  | 0.282928 | 11.30                      | 0.91          | 0.45        | 0.04          | 0.57         | 0.04          |
| KT-03-3  | 320    | 1.89E-02                                 | 2.62E-04  | 7.64E-04                                 | 1.20E-05  | 0.282833                                 | 0.000027  | 0.282828 | 9.03                       | 0.95          | 0.59        | 0.04          | 0.75         | 0.04          |
| KT-03-4  | 311    | 1.00E-02                                 | 1.96E-04  | 3.68E-04                                 | 6.00E-06  | 0.282926                                 | 0.000027  | 0.282924 | 12.21                      | 0.95          | 0.45        | 0.04          | 0.54         | 0.04          |
| KT-03-6  | 437    | 2.55E-02                                 | 7.80E-05  | 9.58E-04                                 | 2.00E-06  | 0.282909                                 | 0.000026  | 0.282901 | 14.19                      | 0.91          | 0.49        | 0.04          | 0.52         | 0.04          |
| KT-03-7  | 258    | 3.73E-02                                 | 3.36E-04  | 1.31E-03                                 | 1.20E-05  | 0.282995                                 | 0.00003   | 0.282989 | 13.33                      | 1.05          | 0.37        | 0.04          | 0.43         | 0.04          |
| KT-03-8  | 306    | 1.66E-02                                 | 1.45E-04  | 6.19E-04                                 | 6.00E-06  | 0.282905                                 | 0.000028  | 0.282901 | 11.31                      | 0.98          | 0.49        | 0.04          | 0.60         | 0.04          |
| KT-03-9  | 300    | 3.99E-02                                 | 2.86E-04  | 1.40E-03                                 | 1.00E-05  | 0.282962                                 | 0.000023  | 0.282954 | 13.04                      | 0.81          | 0.42        | 0.03          | 0.48         | 0.03          |
| KT-03-10 | 290    | 2.27E-02                                 | 8.02E-04  | 8.44E-04                                 | 2.60E-05  | 0.282882                                 | 0.000026  | 0.282877 | 10.10                      | 0.91          | 0.52        | 0.04          | 0.66         | 0.04          |
| KT-03-11 | 285    | 1.87E-02                                 | 3.30E-04  | 7.05E-04                                 | 1.20E-05  | 0.282899                                 | 0.000021  | 0.282895 | 10.62                      | 0.74          | 0.50        | 0.03          | 0.62         | 0.03          |
| KT-03-14 | 338    | 3.16E-02                                 | 1.14E-03  | 1.17E-03                                 | 4.20E-05  | 0.282962                                 | 0.000024  | 0.282955 | 13.89                      | 0.84          | 0.41        | 0.03          | 0.46         | 0.03          |
| KT-03-19 | 345    | 1.38E-02                                 | 5.30E-04  | 5.71E-04                                 | 2.00E-05  | 0.282913                                 | 0.000019  | 0.282909 | 12.44                      | 0.67          | 0.48        | 0.03          | 0.56         | 0.03          |

| Sample   | T (Ma) | $^{176}\text{Yb}/^{177}\text{Hf}$ (corr) | $2\sigma$ | $^{176}\text{Lu}/^{177}\text{Hf}$ (corr) | $2\sigma$ | $^{176}\text{Hf}/^{177}\text{Hf}$ (corr) | $2\sigma$ | Hf       | $\varepsilon\text{Hf}$ (t) | $\pm 1\sigma$ | T(DM1) (Ga) | $\pm 1\sigma$ | T (DM2) (Ga) | $\pm 1\sigma$ |
|----------|--------|------------------------------------------|-----------|------------------------------------------|-----------|------------------------------------------|-----------|----------|----------------------------|---------------|-------------|---------------|--------------|---------------|
| KT-03-20 | 330    | 1.72E-02                                 | 2.76E-04  | 6.70E-04                                 | 1.10E-05  | 0.282879                                 | 0.00002   | 0.282875 | 10.89                      | 0.70          | 0.52        | 0.03          | 0.64         | 0.03          |
| KT-03-21 | 316    | 2.32E-02                                 | 5.96E-04  | 8.02E-04                                 | 2.30E-05  | 0.282911                                 | 0.00003   | 0.282906 | 11.70                      | 1.05          | 0.48        | 0.04          | 0.58         | 0.04          |
| KT-03-22 | 439    | 3.35E-02                                 | 2.14E-04  | 1.24E-03                                 | 8.00E-06  | 0.282882                                 | 0.00002   | 0.282872 | 13.20                      | 0.70          | 0.53        | 0.03          | 0.58         | 0.03          |
| KT-03-30 | 350    | 2.52E-02                                 | 5.12E-04  | 9.69E-04                                 | 2.10E-05  | 0.28282                                  | 0.000032  | 0.282814 | 9.17                       | 1.12          | 0.61        | 0.05          | 0.77         | 0.05          |
| KT-03-33 | 419    | 2.85E-02                                 | 6.34E-04  | 1.03E-03                                 | 1.90E-05  | 0.282859                                 | 0.000024  | 0.282851 | 12.01                      | 0.84          | 0.56        | 0.03          | 0.64         | 0.03          |
| KT-03-34 | 356    | 2.80E-02                                 | 1.47E-03  | 1.05E-03                                 | 4.60E-05  | 0.282923                                 | 0.000023  | 0.282916 | 12.92                      | 0.81          | 0.47        | 0.03          | 0.53         | 0.03          |
| KT-03-36 | 279    | 4.30E-02                                 | 1.66E-03  | 1.53E-03                                 | 5.10E-05  | 0.28293                                  | 0.000023  | 0.282922 | 11.44                      | 0.81          | 0.46        | 0.03          | 0.57         | 0.03          |
| KT-03-40 | 457    | 2.08E-02                                 | 1.88E-04  | 7.99E-04                                 | 9.00E-06  | 0.282883                                 | 0.000021  | 0.282876 | 13.75                      | 0.74          | 0.52        | 0.03          | 0.56         | 0.03          |
| KT-03-43 | 367    | 4.22E-02                                 | 3.52E-04  | 1.67E-03                                 | 1.30E-05  | 0.282943                                 | 0.000027  | 0.282932 | 13.72                      | 0.95          | 0.45        | 0.04          | 0.49         | 0.04          |
| KT-03-48 | 451    | 1.86E-02                                 | 3.40E-04  | 6.84E-04                                 | 9.00E-06  | 0.282887                                 | 0.000024  | 0.282881 | 13.79                      | 0.84          | 0.51        | 0.03          | 0.55         | 0.03          |
| KT-03-56 | 362    | 1.05E-02                                 | 1.91E-04  | 3.90E-04                                 | 5.00E-06  | 0.282911                                 | 0.000027  | 0.282908 | 12.79                      | 0.95          | 0.48        | 0.04          | 0.55         | 0.04          |
| KT-03-61 | 400    | 1.37E-01                                 | 1.79E-03  | 4.49E-03                                 | 3.70E-05  | 0.282855                                 | 0.00003   | 0.282821 | 10.55                      | 1.05          | 0.62        | 0.05          | 0.72         | 0.05          |
| KT-03-64 | 416    | 2.51E-02                                 | 1.85E-03  | 8.56E-04                                 | 5.10E-05  | 0.28301                                  | 0.000028  | 0.283003 | 17.34                      | 0.98          | 0.34        | 0.04          | 0.30         | 0.04          |
| KT-03-67 | 273    | 4.25E-02                                 | 5.30E-04  | 1.52E-03                                 | 2.30E-05  | 0.282915                                 | 0.000026  | 0.282907 | 10.78                      | 0.91          | 0.48        | 0.04          | 0.61         | 0.04          |
| KT-03-86 | 423    | 2.20E-02                                 | 2.50E-04  | 8.40E-04                                 | 6.00E-06  | 0.282628                                 | 0.000021  | 0.282621 | 3.97                       | 0.74          | 0.88        | 0.03          | 1.15         | 0.03          |
| KT-03-93 | 370    | 4.00E-02                                 | 5.54E-04  | 1.51E-03                                 | 7.00E-06  | 0.282939                                 | 0.000028  | 0.282929 | 13.68                      | 0.98          | 0.45        | 0.04          | 0.50         | 0.04          |
| KT-05    |        |                                          |           |                                          |           |                                          |           |          |                            |               |             |               |              |               |
| KT-05-1  | 179    | 2.32E-02                                 | 1.46E-04  | 9.47E-04                                 | 5.00E-06  | 0.282864                                 | 0.000024  | 0.282861 | 7.07                       | 0.84          | 0.55        | 0.03          | 0.77         | 0.03          |
| KT-05-6  | 177    | 1.66E-02                                 | 3.92E-04  | 7.49E-04                                 | 1.60E-05  | 0.282912                                 | 0.000019  | 0.28291  | 8.75                       | 0.67          | 0.48        | 0.03          | 0.66         | 0.03          |
| KT-05-12 | 165    | 4.99E-02                                 | 1.37E-03  | 2.04E-03                                 | 5.20E-05  | 0.28278                                  | 0.000025  | 0.282774 | 3.68                       | 0.88          | 0.69        | 0.04          | 0.98         | 0.04          |
| KT-05-17 | 306    | 2.98E-02                                 | 8.41E-04  | 1.12E-03                                 | 2.70E-05  | 0.282873                                 | 0.000035  | 0.282867 | 10.07                      | 1.23          | 0.54        | 0.05          | 0.68         | 0.05          |
| KT-05-23 | 306    | 3.89E-02                                 | 3.22E-04  | 1.70E-03                                 | 1.40E-05  | 0.282896                                 | 0.000016  | 0.282886 | 10.77                      | 0.56          | 0.51        | 0.02          | 0.63         | 0.02          |
| KT-05-29 | 325    | 4.36E-02                                 | 6.11E-04  | 1.76E-03                                 | 2.20E-05  | 0.28287                                  | 0.000038  | 0.282859 | 10.23                      | 1.33          | 0.55        | 0.06          | 0.68         | 0.06          |
| KT-05-33 | 378    | 2.15E-02                                 | 1.32E-04  | 9.48E-04                                 | 7.00E-06  | 0.282797                                 | 0.000025  | 0.28279  | 8.96                       | 0.88          | 0.64        | 0.04          | 0.80         | 0.04          |
| KT-05-35 | 793    | 8.41E-02                                 | 1.16E-03  | 3.36E-03                                 | 4.50E-05  | 0.282614                                 | 0.000028  | 0.282564 | 10.16                      | 0.98          | 0.96        | 0.04          | 1.05         | 0.04          |

| Sample   | T (Ma) | $^{176}\text{Yb}/^{177}\text{Hf}$ (corr) | $2\sigma$ | $^{176}\text{Lu}/^{177}\text{Hf}$ (corr) | $2\sigma$ | $^{176}\text{Hf}/^{177}\text{Hf}$ (corr) | $2\sigma$ | Hf       | $\varepsilon\text{Hf}$ (t) | $\pm 1\sigma$ | T(DM1) (Ga) | $\pm 1\sigma$ | T (DM2) (Ga) | $\pm 1\sigma$ |
|----------|--------|------------------------------------------|-----------|------------------------------------------|-----------|------------------------------------------|-----------|----------|----------------------------|---------------|-------------|---------------|--------------|---------------|
| KT-05-38 | 506    | 3.21E-02                                 | 2.32E-04  | 1.49E-03                                 | 1.00E-05  | 0.282697                                 | 0.000023  | 0.282683 | 7.99                       | 0.81          | 0.80        | 0.03          | 0.96         | 0.03          |
| KT-05-39 | 257    | 3.21E-02                                 | 2.69E-04  | 1.39E-03                                 | 1.40E-05  | 0.282736                                 | 0.000024  | 0.282729 | 4.13                       | 0.84          | 0.74        | 0.03          | 1.02         | 0.03          |
| KT-05-42 | 313    | 2.84E-02                                 | 1.13E-04  | 1.12E-03                                 | 4.00E-06  | 0.282932                                 | 0.000024  | 0.282925 | 12.31                      | 0.84          | 0.46        | 0.03          | 0.54         | 0.03          |
| KT-05-44 | 269    | 2.65E-02                                 | 1.11E-04  | 1.09E-03                                 | 3.00E-06  | 0.282868                                 | 0.000025  | 0.282863 | 9.11                       | 0.88          | 0.55        | 0.04          | 0.71         | 0.04          |
| KT-05-47 | 174    | 3.84E-02                                 | 3.15E-04  | 1.50E-03                                 | 1.00E-05  | 0.282888                                 | 0.000023  | 0.282883 | 7.74                       | 0.81          | 0.52        | 0.03          | 0.72         | 0.03          |
| KT-05-48 | 308    | 5.84E-02                                 | 2.38E-04  | 2.32E-03                                 | 8.00E-06  | 0.282948                                 | 0.000024  | 0.282935 | 12.52                      | 0.84          | 0.45        | 0.04          | 0.52         | 0.04          |
| KT-05-49 | 309    | 6.02E-02                                 | 3.78E-04  | 2.34E-03                                 | 1.30E-05  | 0.28289                                  | 0.00003   | 0.282876 | 10.49                      | 1.05          | 0.53        | 0.04          | 0.65         | 0.04          |
| KT-05-52 | 246    | 4.54E-02                                 | 5.92E-04  | 1.72E-03                                 | 2.50E-05  | 0.282904                                 | 0.000028  | 0.282896 | 9.79                       | 0.98          | 0.50        | 0.04          | 0.65         | 0.04          |
| KT-05-58 | 171    | 3.02E-02                                 | 4.29E-04  | 1.23E-03                                 | 1.40E-05  | 0.282999                                 | 0.000021  | 0.282995 | 11.64                      | 0.74          | 0.36        | 0.03          | 0.47         | 0.03          |
| KT-05-59 | 411    | 1.82E-02                                 | 3.63E-04  | 8.05E-04                                 | 1.40E-05  | 0.282615                                 | 0.000022  | 0.282609 | 3.27                       | 0.77          | 0.90        | 0.03          | 1.19         | 0.03          |
| KT-05-71 | 267    | 1.79E-02                                 | 1.31E-04  | 8.01E-04                                 | 5.00E-06  | 0.282672                                 | 0.000029  | 0.282668 | 2.18                       | 1.02          | 0.82        | 0.04          | 1.15         | 0.04          |
| KT-05-72 | 175    | 2.00E-02                                 | 7.70E-05  | 8.13E-04                                 | 3.00E-06  | 0.282836                                 | 0.000023  | 0.282833 | 6.01                       | 0.81          | 0.59        | 0.03          | 0.83         | 0.03          |
| KT-05-76 | 335    | 2.41E-02                                 | 3.03E-04  | 1.09E-03                                 | 1.20E-05  | 0.283024                                 | 0.000028  | 0.283017 | 16.04                      | 0.98          | 0.32        | 0.04          | 0.32         | 0.04          |
| KT-05-78 | 172    | 3.38E-02                                 | 3.83E-04  | 1.40E-03                                 | 1.40E-05  | 0.282873                                 | 0.000027  | 0.282868 | 7.20                       | 0.95          | 0.54        | 0.04          | 0.76         | 0.04          |
| KT-05-79 | 171    | 6.21E-02                                 | 6.41E-04  | 2.43E-03                                 | 2.50E-05  | 0.282796                                 | 0.000037  | 0.282788 | 4.32                       | 1.30          | 0.67        | 0.05          | 0.94         | 0.05          |
| KT-05-81 | 348    | 4.50E-02                                 | 3.43E-04  | 1.74E-03                                 | 1.30E-05  | 0.282805                                 | 0.000022  | 0.282794 | 8.42                       | 0.77          | 0.65        | 0.03          | 0.81         | 0.03          |
| KT-05-84 | 177    | 3.05E-02                                 | 3.50E-04  | 1.24E-03                                 | 1.30E-05  | 0.282815                                 | 0.000036  | 0.282811 | 5.26                       | 1.26          | 0.62        | 0.05          | 0.88         | 0.05          |
| KT-05-88 | 178    | 4.31E-02                                 | 2.66E-04  | 1.79E-03                                 | 1.00E-05  | 0.28276                                  | 0.000024  | 0.282754 | 3.27                       | 0.84          | 0.71        | 0.03          | 1.01         | 0.03          |
| KT-05-92 | 332    | 1.89E-02                                 | 1.54E-04  | 7.28E-04                                 | 6.00E-06  | 0.282748                                 | 0.000021  | 0.282743 | 6.29                       | 0.74          | 0.71        | 0.03          | 0.94         | 0.03          |
| KT-05-97 | 305    | 1.95E-02                                 | 1.98E-04  | 7.82E-04                                 | 6.00E-06  | 0.282552                                 | 0.000042  | 0.282548 | -1.24                      | 1.47          | 0.99        | 0.06          | 1.39         | 0.06          |
| KT-05-99 | 525    | 2.75E-02                                 | 2.69E-04  | 1.16E-03                                 | 1.00E-05  | 0.282399                                 | 0.000028  | 0.282388 | -2.05                      | 0.98          | 1.21        | 0.04          | 1.61         | 0.04          |
| KT-06    |        |                                          |           |                                          |           |                                          |           |          |                            |               |             |               |              |               |
| KT-06-1  | 413    | 4.53E-02                                 | 6.72E-04  | 1.64E-03                                 | 2.40E-05  | 0.282641                                 | 0.000029  | 0.282628 | 4.00                       | 1.02          | 0.88        | 0.04          | 1.15         | 0.04          |
| KT-06-2  | 395    | 2.56E-02                                 | 6.32E-04  | 9.54E-04                                 | 2.60E-05  | 0.282654                                 | 0.000023  | 0.282647 | 4.26                       | 0.81          | 0.85        | 0.03          | 1.11         | 0.03          |
| KT-06-4  | 427    | 2.26E-02                                 | 5.28E-04  | 9.82E-04                                 | 2.10E-05  | 0.282914                                 | 0.000026  | 0.282906 | 14.14                      | 0.91          | 0.48        | 0.04          | 0.51         | 0.04          |

| Sample   | T (Ma) | $^{176}\text{Yb}/^{177}\text{Hf}$ (corr) | $2\sigma$ | $^{176}\text{Lu}/^{177}\text{Hf}$ (corr) | $2\sigma$ | $^{176}\text{Hf}/^{177}\text{Hf}$ (corr) | $2\sigma$ | Hf       | $\varepsilon\text{Hf}$ (t) | $\pm 1\sigma$ | T(DM1) (Ga) | $\pm 1\sigma$ | T (DM2) (Ga) | $\pm 1\sigma$ |
|----------|--------|------------------------------------------|-----------|------------------------------------------|-----------|------------------------------------------|-----------|----------|----------------------------|---------------|-------------|---------------|--------------|---------------|
| KT-06-5  | 298    | 4.29E-02                                 | 1.04E-03  | 1.54E-03                                 | 3.30E-05  | 0.282934                                 | 0.000029  | 0.282925 | 11.98                      | 1.02          | 0.46        | 0.04          | 0.55         | 0.04          |
| KT-06-6  | 285    | 2.89E-02                                 | 2.32E-03  | 1.06E-03                                 | 8.20E-05  | 0.282914                                 | 0.000024  | 0.282908 | 11.09                      | 0.84          | 0.48        | 0.03          | 0.60         | 0.03          |
| KT-06-7  | 419    | 1.54E-02                                 | 1.85E-04  | 5.60E-04                                 | 6.00E-06  | 0.282654                                 | 0.000021  | 0.28265  | 4.89                       | 0.74          | 0.84        | 0.03          | 1.09         | 0.03          |
| KT-06-8  | 380    | 3.25E-02                                 | 5.12E-04  | 1.22E-03                                 | 2.30E-05  | 0.282564                                 | 0.000026  | 0.282555 | 0.69                       | 0.91          | 0.98        | 0.04          | 1.33         | 0.04          |
| KT-06-10 | 306    | 3.05E-02                                 | 2.34E-04  | 1.15E-03                                 | 1.30E-05  | 0.282897                                 | 0.000027  | 0.28289  | 10.92                      | 0.95          | 0.51        | 0.04          | 0.62         | 0.04          |
| KT-06-12 | 461    | 5.15E-02                                 | 2.70E-03  | 1.83E-03                                 | 1.00E-04  | 0.282667                                 | 0.000031  | 0.282651 | 5.87                       | 1.09          | 0.85        | 0.04          | 1.06         | 0.04          |
| KT-06-14 | 407    | 6.45E-02                                 | 3.14E-03  | 2.25E-03                                 | 9.50E-05  | 0.282695                                 | 0.000024  | 0.282678 | 5.62                       | 0.84          | 0.82        | 0.04          | 1.04         | 0.04          |
| KT-06-15 | 471    | 9.90E-03                                 | 3.36E-04  | 3.78E-04                                 | 1.20E-05  | 0.282414                                 | 0.000023  | 0.282411 | -2.42                      | 0.81          | 1.17        | 0.03          | 1.60         | 0.03          |
| KT-06-16 | 273    | 3.56E-02                                 | 4.56E-04  | 1.26E-03                                 | 1.60E-05  | 0.282831                                 | 0.000031  | 0.282825 | 7.86                       | 1.09          | 0.60        | 0.04          | 0.79         | 0.04          |
| KT-06-18 | 312    | 4.89E-02                                 | 1.33E-03  | 1.75E-03                                 | 5.00E-05  | 0.282914                                 | 0.00003   | 0.282904 | 11.52                      | 1.05          | 0.49        | 0.04          | 0.59         | 0.04          |
| KT-06-19 | 328    | 5.84E-02                                 | 4.48E-04  | 2.03E-03                                 | 2.00E-05  | 0.282967                                 | 0.000035  | 0.282955 | 13.67                      | 1.23          | 0.42        | 0.05          | 0.46         | 0.05          |
| KT-06-21 | 399    | 4.73E-02                                 | 1.38E-03  | 1.58E-03                                 | 5.10E-05  | 0.282664                                 | 0.000025  | 0.282652 | 4.54                       | 0.88          | 0.85        | 0.04          | 1.10         | 0.04          |
| KT-06-22 | 232    | 2.43E-02                                 | 4.28E-04  | 8.28E-04                                 | 1.40E-05  | 0.282726                                 | 0.000028  | 0.282722 | 3.34                       | 0.98          | 0.74        | 0.04          | 1.05         | 0.04          |
| KT-06-24 | 506    | 2.58E-02                                 | 1.29E-03  | 1.01E-03                                 | 5.40E-05  | 0.282557                                 | 0.000025  | 0.282547 | 3.19                       | 0.88          | 0.98        | 0.04          | 1.27         | 0.04          |
| KT-06-34 | 451    | 2.01E-02                                 | 8.88E-04  | 8.42E-04                                 | 3.20E-05  | 0.282892                                 | 0.000025  | 0.282885 | 13.92                      | 0.88          | 0.51        | 0.04          | 0.54         | 0.04          |
| KT-06-35 | 581    | 3.53E-02                                 | 4.04E-03  | 1.43E-03                                 | 1.60E-04  | 0.281581                                 | 0.000032  | 0.281565 | -29.92                     | 1.12          | 2.37        | 0.04          | 3.39         | 0.04          |
| KT-06-43 | 293    | 2.50E-02                                 | 3.56E-04  | 8.86E-04                                 | 7.00E-06  | 0.282956                                 | 0.00003   | 0.282951 | 12.78                      | 1.05          | 0.42        | 0.04          | 0.49         | 0.04          |
| KT-06-49 | 457    | 3.41E-02                                 | 8.66E-04  | 1.44E-03                                 | 3.10E-05  | 0.282919                                 | 0.000026  | 0.282907 | 14.83                      | 0.91          | 0.48        | 0.04          | 0.49         | 0.04          |
| KT-06-50 | 434    | 4.13E-02                                 | 1.32E-03  | 1.50E-03                                 | 5.30E-05  | 0.282676                                 | 0.000021  | 0.282664 | 5.72                       | 0.74          | 0.83        | 0.03          | 1.05         | 0.03          |
| KT-06-53 | 259    | 5.76E-02                                 | 1.64E-03  | 2.14E-03                                 | 6.10E-05  | 0.282824                                 | 0.000023  | 0.282814 | 7.16                       | 0.81          | 0.63        | 0.03          | 0.83         | 0.03          |
| KT-06-61 | 445    | 6.48E-02                                 | 1.96E-03  | 2.38E-03                                 | 7.60E-05  | 0.282946                                 | 0.000025  | 0.282926 | 15.25                      | 0.88          | 0.45        | 0.04          | 0.45         | 0.04          |
| KT-06-62 | 424    | 5.66E-02                                 | 1.02E-03  | 2.02E-03                                 | 3.20E-05  | 0.282623                                 | 0.000023  | 0.282607 | 3.49                       | 0.81          | 0.92        | 0.03          | 1.19         | 0.03          |
| KT-06-63 | 336    | 3.06E-02                                 | 6.14E-04  | 1.12E-03                                 | 2.60E-05  | 0.282917                                 | 0.000026  | 0.28291  | 12.27                      | 0.91          | 0.48        | 0.04          | 0.56         | 0.04          |
| KT-06-82 | 228    | 5.04E-02                                 | 3.60E-03  | 1.83E-03                                 | 1.16E-04  | 0.282821                                 | 0.000027  | 0.282813 | 6.46                       | 0.95          | 0.63        | 0.04          | 0.85         | 0.04          |
| KT-06-90 | 464    | 1.54E-02                                 | 1.17E-04  | 7.53E-04                                 | 7.00E-06  | 0.282918                                 | 0.000026  | 0.282911 | 15.15                      | 0.91          | 0.47        | 0.04          | 0.47         | 0.04          |

| Sample   | T (Ma) | $^{176}\text{Yb}/^{177}\text{Hf}$ (corr) | $2\sigma$ | $^{176}\text{Lu}/^{177}\text{Hf}$ (corr) | $2\sigma$ | $^{176}\text{Hf}/^{177}\text{Hf}$ (corr) | $2\sigma$ | Hf       | $\varepsilon\text{Hf}$ (t) | $\pm 1\sigma$ | T(DM1) (Ga) | $\pm 1\sigma$ | T (DM2) (Ga) | $\pm 1\sigma$ |
|----------|--------|------------------------------------------|-----------|------------------------------------------|-----------|------------------------------------------|-----------|----------|----------------------------|---------------|-------------|---------------|--------------|---------------|
| KT-06-92 | 439    | 3.10E-02                                 | 8.70E-04  | 1.22E-03                                 | 3.40E-05  | 0.282909                                 | 0.000023  | 0.282899 | 14.16                      | 0.81          | 0.49        | 0.03          | 0.52         | 0.03          |
| KT-07    |        |                                          |           |                                          |           |                                          |           |          |                            |               |             |               |              |               |
| KT-07-3  | 334    | 2.60E-02                                 | 2.78E-04  | 9.34E-04                                 | 6.00E-06  | 0.282947                                 | 0.000034  | 0.282941 | 13.33                      | 1.19          | 0.43        | 0.05          | 0.49         | 0.05          |
| KT-07-4  | 357    | 6.55E-02                                 | 3.42E-03  | 2.28E-03                                 | 1.26E-04  | 0.282825                                 | 0.000037  | 0.28281  | 9.19                       | 1.30          | 0.63        | 0.05          | 0.77         | 0.05          |
| KT-07-5  | 343    | 2.58E-02                                 | 8.06E-04  | 1.01E-03                                 | 2.90E-05  | 0.282935                                 | 0.000032  | 0.282929 | 13.08                      | 1.12          | 0.45        | 0.05          | 0.51         | 0.05          |
| KT-07-6  | 312    | 4.44E-02                                 | 1.83E-03  | 1.51E-03                                 | 4.80E-05  | 0.282848                                 | 0.000029  | 0.282839 | 9.23                       | 1.02          | 0.58        | 0.04          | 0.73         | 0.04          |
| KT-07-8  | 293    | 3.67E-02                                 | 7.82E-04  | 1.39E-03                                 | 3.10E-05  | 0.28283                                  | 0.000036  | 0.282822 | 8.22                       | 1.26          | 0.61        | 0.05          | 0.78         | 0.05          |
| KT-07-10 | 176    | 1.78E-02                                 | 3.14E-04  | 6.21E-04                                 | 1.40E-05  | 0.282925                                 | 0.000031  | 0.282923 | 9.20                       | 1.09          | 0.46        | 0.04          | 0.63         | 0.04          |
| KT-07-11 | 323    | 5.95E-02                                 | 7.80E-04  | 2.02E-03                                 | 3.10E-05  | 0.282703                                 | 0.000038  | 0.282691 | 4.23                       | 1.33          | 0.80        | 0.06          | 1.06         | 0.06          |
| KT-07-13 | 387    | 3.37E-02                                 | 7.54E-04  | 1.20E-03                                 | 1.50E-05  | 0.282905                                 | 0.000033  | 0.282896 | 12.91                      | 1.16          | 0.50        | 0.05          | 0.56         | 0.05          |
| KT-07-14 | 193    | 4.18E-02                                 | 7.92E-04  | 1.45E-03                                 | 2.60E-05  | 0.282955                                 | 0.000027  | 0.28295  | 10.53                      | 0.95          | 0.43        | 0.04          | 0.56         | 0.04          |
| KT-07-20 | 275    | 1.78E-02                                 | 1.81E-04  | 6.67E-04                                 | 5.00E-06  | 0.282888                                 | 0.000026  | 0.282885 | 10.02                      | 0.91          | 0.51        | 0.04          | 0.66         | 0.04          |
| KT-07-22 | 355    | 2.88E-02                                 | 9.98E-04  | 9.51E-04                                 | 3.20E-05  | 0.282906                                 | 0.000036  | 0.2829   | 12.32                      | 1.26          | 0.49        | 0.05          | 0.57         | 0.05          |
| KT-07-23 | 185    | 3.24E-02                                 | 4.32E-04  | 1.17E-03                                 | 1.20E-05  | 0.282843                                 | 0.000029  | 0.282839 | 6.43                       | 1.02          | 0.58        | 0.04          | 0.82         | 0.04          |
| KT-07-26 | 533    | 1.80E-02                                 | 1.96E-04  | 6.89E-04                                 | 7.00E-06  | 0.282714                                 | 0.000028  | 0.282707 | 9.45                       | 0.98          | 0.76        | 0.04          | 0.89         | 0.04          |
| KT-07-27 | 223    | 2.72E-02                                 | 3.74E-04  | 1.11E-03                                 | 8.00E-06  | 0.282902                                 | 0.00002   | 0.282897 | 9.34                       | 0.70          | 0.50        | 0.03          | 0.66         | 0.03          |
| KT-07-30 | 304    | 3.15E-02                                 | 1.93E-04  | 1.14E-03                                 | 7.00E-06  | 0.282784                                 | 0.000025  | 0.282778 | 6.88                       | 0.88          | 0.67        | 0.04          | 0.88         | 0.04          |
| KT-07-35 | 243    | 4.82E-02                                 | 3.84E-04  | 1.74E-03                                 | 1.40E-05  | 0.282842                                 | 0.000031  | 0.282834 | 7.53                       | 1.09          | 0.59        | 0.04          | 0.79         | 0.04          |
| KT-07-44 | 168    | 5.40E-02                                 | 1.30E-03  | 1.88E-03                                 | 6.20E-05  | 0.282751                                 | 0.000039  | 0.282745 | 2.73                       | 1.37          | 0.73        | 0.06          | 1.04         | 0.06          |
| KT-07-45 | 452    | 1.46E-02                                 | 1.90E-04  | 5.00E-04                                 | 1.40E-05  | 0.282725                                 | 0.000029  | 0.282721 | 8.14                       | 1.02          | 0.74        | 0.04          | 0.91         | 0.04          |
| KT-07-46 | 161    | 3.13E-02                                 | 2.48E-04  | 1.15E-03                                 | 6.00E-06  | 0.282886                                 | 0.00003   | 0.282883 | 7.44                       | 1.05          | 0.52        | 0.04          | 0.73         | 0.04          |
| KT-07-50 | 238    | 2.28E-02                                 | 1.55E-03  | 7.20E-04                                 | 5.20E-05  | 0.282696                                 | 0.000033  | 0.282693 | 2.42                       | 1.16          | 0.78        | 0.05          | 1.11         | 0.05          |
| KT-07-52 | 157    | 8.92E-02                                 | 4.04E-03  | 2.85E-03                                 | 1.09E-04  | 0.282856                                 | 0.000034  | 0.282848 | 6.12                       | 1.19          | 0.59        | 0.05          | 0.81         | 0.05          |
| KT-07-54 | 260    | 8.08E-02                                 | 2.96E-03  | 2.73E-03                                 | 1.05E-04  | 0.282843                                 | 0.000034  | 0.28283  | 7.75                       | 1.19          | 0.61        | 0.05          | 0.79         | 0.05          |
| KT-07-64 | 464    | 1.74E-02                                 | 1.88E-04  | 5.98E-04                                 | 6.00E-06  | 0.282611                                 | 0.000024  | 0.282606 | 4.33                       | 0.84          | 0.90        | 0.03          | 1.16         | 0.03          |



| Sample   | T (Ma) | $^{176}\text{Yb}/^{177}\text{Hf}$ (corr) | $2\sigma$ | $^{176}\text{Lu}/^{177}\text{Hf}$ (corr) | $2\sigma$ | $^{176}\text{Hf}/^{177}\text{Hf}$ (corr) | $2\sigma$ | Hf       | $\varepsilon\text{Hf}(t)$ | $\pm 1\sigma$ | T(DM1) (Ga) | $\pm 1\sigma$ | T (DM2) (Ga) | $\pm 1\sigma$ |
|----------|--------|------------------------------------------|-----------|------------------------------------------|-----------|------------------------------------------|-----------|----------|---------------------------|---------------|-------------|---------------|--------------|---------------|
| KT-07-72 | 364    | 2.57E-02                                 | 7.84E-04  | 9.79E-04                                 | 2.50E-05  | 0.282881                                 | 0.000021  | 0.282874 | 11.63                     | 0.74          | 0.53        | 0.03          | 0.62         | 0.03          |
| KT-07-74 | 349    | 3.40E-02                                 | 5.14E-04  | 1.22E-03                                 | 2.30E-05  | 0.282913                                 | 0.000029  | 0.282905 | 12.38                     | 1.02          | 0.48        | 0.04          | 0.56         | 0.04          |
| KT-07-75 | 250    | 1.77E-02                                 | 4.98E-04  | 6.12E-04                                 | 1.40E-05  | 0.282678                                 | 0.000021  | 0.282675 | 2.06                      | 0.74          | 0.81        | 0.03          | 1.14         | 0.03          |
| KT-07-82 | 504    | 2.36E-02                                 | 5.90E-04  | 7.88E-04                                 | 1.80E-05  | 0.282492                                 | 0.000021  | 0.282485 | 0.92                      | 0.74          | 1.07        | 0.03          | 1.41         | 0.03          |
| KT-07-87 | 285    | 6.97E-02                                 | 5.26E-04  | 2.23E-03                                 | 2.00E-05  | 0.282999                                 | 0.000031  | 0.282987 | 13.87                     | 1.09          | 0.37        | 0.05          | 0.42         | 0.05          |
| KT-07-92 | 958    | 1.51E-02                                 | 8.44E-04  | 5.31E-04                                 | 2.70E-05  | 0.282161                                 | 0.000022  | 0.282151 | -0.78                     | 0.77          | 1.52        | 0.03          | 1.86         | 0.03          |
